# Supplementary material for: Powdery mildew resistance prediction in Barley (Hordeum Vulgare L) with emphasis on machine learning approaches
Source: Sci Rep. 2025 Jun 4;15:19556. doi: 10.1038/s41598-025-02939-3 (PMC12137941; doi:10.1038/s41598-025-02939-3)
Supplement: Supplementary file 1 — Supplementary Information 1. [file 41598_2025_2939_MOESM1_ESM.xlsx]

## Sheet: Genotypic Features
Line code	x1	x2	x3	x4	x5	x6	x7	x8	x9	x10	x11	x12	x13	x14	x15	x16	x17	x18	x19	x20	x21	x22	x23	x24	x25	x26	x27	x28	x29	x30	x31	x32	x33	x34	x35	x36	x37	x38	x39	x40	x41	x42	x43	x44	x45	x46	x47	x48	x49
1	4	3	3	2	3	1	3	4	1	2	4	3	1	4	1	1	1	3	1	2	4	3	1	4	4	1	2	1	4	2	3	1	3	1	2	2	2	1	1	4	2	1	1	3	1	2	3	4	1
2	4	1	1	4	3	2	1	4	2	2	2	1	1	4	1	1	2	1	1	2	4	3	1	4	4	1	2	3	2	1	1	1	3	1	2	2	2	2	1	4	1	1	3	3	1	2	3	2	1
3	4	3	3	4	1	1	1	4	1	2	4	1	2	4	1	3	1	3	1	4	4	1	1	4	4	1	4	3	2	1	3	1	1	1	2	1	2	1	1	4	2	1	1	3	1	2	3	2	1
4	4	1	1	2	3	1	3	2	1	1	4	1	1	4	1	1	1	3	1	2	4	3	1	4	4	1	4	1	2	2	1	1	3	1	2	2	2	1	3	4	1	1	3	1	1	2	1	2	3
5	2	1	3	2	1	2	3	4	2	1	2	1	2	4	3	1	1	1	1	2	4	3	3	4	4	1	2	3	4	1	1	1	3	1	2	1	2	1	3	2	1	1	3	1	1	2	3	2	3
6	2	3	1	2	3	1	1	4	2	2	4	1	2	2	1	3	2	1	1	4	4	3	3	4	4	1	2	3	2	2	3	1	3	1	4	1	2	2	3	2	1	2	3	3	2	2	3	2	1
7	2	1	1	2	3	1	1	4	2	1	2	1	1	2	1	1	2	1	1	4	2	3	3	2	4	1	2	1	4	1	3	1	1	1	2	2	4	2	1	2	1	2	3	1	1	1	1	2	3
8	2	3	3	2	3	1	1	2	1	2	2	1	2	4	1	1	1	1	1	2	2	3	3	4	4	1	4	3	2	1	3	1	1	1	4	1	2	1	3	2	1	1	3	3	2	2	3	2	1
9	2	1	1	2	3	2	3	4	2	2	2	1	2	2	1	3	1	1	1	2	2	3	3	4	4	1	2	1	2	2	3	1	3	1	2	1	2	2	1	4	1	1	3	1	1	1	3	4	3
10	2	3	1	2	1	1	1	4	1	1	4	1	1	2	1	3	2	3	1	2	4	3	1	4	4	1	2	1	2	2	3	1	3	1	2	1	4	1	1	4	1	1	3	1	1	1	3	4	1
11	2	3	3	2	1	2	3	4	2	2	4	3	1	2	1	3	2	3	1	4	4	1	1	4	4	1	4	1	2	2	1	1	1	1	4	2	2	1	1	4	2	1	3	3	2	2	3	4	3
12	2	3	3	2	3	2	1	4	2	2	2	1	2	2	1	3	2	1	1	4	4	1	1	4	4	1	2	1	2	2	3	1	1	1	4	1	2	1	3	2	1	1	3	3	2	2	3	2	3
13	4	3	3	2	3	2	3	4	1	1	4	3	2	4	1	3	2	3	1	2	4	3	1	4	4	1	2	3	4	2	3	1	3	1	4	2	2	1	1	4	1	1	3	3	2	2	3	4	3
14	4	1	3	2	3	1	3	2	1	2	2	1	2	4	3	1	1	1	1	2	4	1	3	4	4	1	4	1	4	1	3	1	3	1	4	1	2	1	3	4	2	1	3	3	2	2	1	2	1
15	4	3	3	2	1	1	3	4	2	2	2	1	1	4	3	1	2	1	1	2	4	3	3	4	2	1	2	3	4	1	1	1	3	1	2	2	2	1	3	2	1	1	3	1	1	1	3	2	1
16	2	3	1	2	3	1	1	4	1	1	2	1	2	4	1	1	1	3	1	2	4	3	1	4	4	1	4	3	4	1	3	1	3	1	2	1	2	1	1	2	1	2	1	3	1	2	3	2	1
17	4	3	3	2	1	2	1	4	1	2	2	1	2	4	1	3	2	3	1	2	4	1	3	4	4	1	2	1	2	1	3	2	3	1	2	1	2	2	1	4	1	1	1	3	1	1	3	2	1
18	4	3	3	2	3	2	1	2	2	2	2	3	2	4	1	3	2	1	1	4	4	3	3	4	4	1	2	3	2	1	3	2	3	1	2	1	4	1	3	4	1	1	3	1	1	2	3	2	1
19	2	3	3	2	3	1	1	4	1	1	2	1	2	4	3	1	1	3	1	2	2	3	3	4	4	1	2	1	4	1	3	1	3	1	4	2	2	1	3	2	2	1	3	1	2	2	3	2	1
20	4	1	1	2	3	2	3	4	2	1	2	1	2	4	3	3	1	1	1	2	4	3	3	4	4	1	4	3	2	2	3	2	3	1	2	2	4	1	3	4	1	2	3	3	1	2	3	4	1
21	4	3	1	4	3	2	1	4	2	1	4	1	1	4	3	1	2	3	1	2	4	3	3	4	4	1	4	3	2	1	3	2	3	1	2	1	4	1	3	4	2	1	1	3	1	2	3	2	1
22	4	3	1	2	3	1	3	4	1	2	4	1	1	2	3	1	1	3	1	4	4	3	3	4	4	2	2	3	4	2	3	1	3	1	2	1	4	1	3	4	1	1	1	3	1	1	3	4	1
23	4	1	1	2	3	1	1	4	1	1	2	1	1	4	3	1	2	1	1	2	4	3	3	4	4	1	4	1	2	1	3	1	3	1	2	1	4	2	3	4	1	1	1	1	1	1	1	2	1
24	4	3	3	2	3	1	1	2	1	1	4	3	1	4	1	1	2	3	1	4	2	3	1	4	2	1	2	3	4	1	3	1	1	1	2	2	4	1	1	4	1	1	1	1	1	1	3	2	1
25	4	3	3	2	3	1	3	4	1	2	2	1	2	4	3	3	1	1	1	2	4	3	3	4	4	1	4	1	4	2	3	1	3	1	4	2	4	1	3	4	1	1	3	3	1	2	3	2	1
26	4	1	1	2	3	2	1	4	1	1	4	3	2	4	3	3	1	3	1	2	4	1	3	4	4	1	4	1	2	2	1	2	3	1	4	1	2	1	3	4	1	1	3	3	2	2	1	2	1
27	4	3	1	4	3	2	3	4	2	2	4	3	1	4	1	3	2	1	2	2	4	1	1	4	2	1	4	1	2	2	3	1	1	2	4	2	4	1	1	2	2	1	3	3	2	2	1	4	1
28	4	3	3	4	3	1	3	4	2	1	2	3	1	4	1	3	2	1	1	4	4	1	1	4	4	1	4	3	2	2	3	2	1	1	4	2	4	2	1	2	2	1	3	3	2	2	3	2	1
29	4	1	1	4	3	2	3	4	1	2	2	1	2	2	3	3	1	1	1	2	4	1	3	4	4	1	4	3	2	2	1	1	3	1	4	1	4	1	1	4	1	1	3	3	1	2	3	4	3
30	4	3	3	4	3	1	3	2	1	1	2	1	2	4	3	1	1	1	1	2	4	1	3	4	4	1	4	3	2	1	3	1	3	1	4	2	4	2	1	4	1	1	3	3	1	2	3	4	1
31	2	3	3	4	3	1	1	4	2	2	2	3	2	2	1	1	2	3	1	4	4	1	3	4	4	1	4	3	4	1	1	1	3	1	4	2	4	1	1	2	2	2	1	3	2	2	3	2	1
32	4	1	1	4	3	1	3	2	1	1	2	3	1	4	1	1	2	1	1	2	4	1	1	4	4	1	4	3	2	1	3	1	1	1	4	2	2	1	1	4	1	1	3	3	1	2	3	2	3
33	4	3	3	4	3	2	3	4	2	2	4	1	1	4	3	3	1	1	1	2	4	1	3	4	4	2	4	1	2	2	3	2	3	1	4	1	2	1	1	4	2	1	3	3	2	2	3	4	1
34	2	1	1	4	3	1	3	4	2	2	4	3	2	4	1	1	2	3	1	2	4	1	3	4	4	1	4	1	2	2	3	1	3	1	4	2	4	2	1	2	2	1	3	1	2	2	3	4	3
35	4	1	1	4	3	1	3	4	1	1	2	3	1	4	1	3	2	1	1	2	4	1	1	4	4	1	4	1	2	1	3	2	1	1	2	1	2	1	1	4	1	1	3	1	1	2	3	4	1
36	2	3	3	2	3	1	3	4	1	1	2	3	2	4	1	3	1	1	1	2	4	1	1	4	4	1	2	3	2	2	3	1	1	1	4	1	2	2	1	2	1	1	3	1	1	2	3	4	3
37	2	3	3	2	3	1	3	4	1	2	2	1	2	4	1	1	1	1	1	2	4	3	1	4	4	2	2	3	2	2	3	1	1	1	4	2	4	2	3	2	1	1	3	3	1	2	3	2	1
38	4	3	3	4	3	1	1	4	1	2	4	1	1	2	1	1	2	3	1	2	4	1	1	4	4	2	4	1	2	2	3	1	1	1	4	1	4	1	3	4	2	1	3	3	2	1	3	4	1
39	4	1	1	4	3	1	1	4	1	1	4	3	1	2	1	3	2	3	1	2	4	3	3	4	4	1	4	1	2	2	3	2	3	1	4	2	4	1	1	4	1	1	3	1	1	2	3	4	3
40	4	3	3	4	3	2	3	4	2	2	4	3	2	4	1	1	1	3	1	4	4	1	3	4	4	2	4	1	4	2	3	2	3	1	2	2	4	1	1	4	1	1	1	3	1	2	3	4	3
41	2	1	1	4	3	1	3	2	2	2	4	3	2	4	3	3	2	1	1	2	4	1	3	4	4	1	4	3	2	1	3	1	1	1	4	2	2	1	1	2	2	1	3	1	2	1	3	2	3
42	4	1	1	4	3	1	3	4	1	2	4	1	1	4	3	3	1	1	1	2	4	1	3	4	4	1	4	1	2	1	3	2	3	1	4	1	2	1	1	4	2	1	3	3	2	2	3	4	1
43	4	1	1	4	3	1	3	4	1	2	2	3	1	4	1	3	2	1	1	2	4	3	1	4	4	1	4	3	2	2	3	2	1	1	4	2	4	1	1	4	2	1	3	3	2	2	3	4	3
44	4	3	3	4	3	2	3	2	2	2	2	3	1	4	1	3	2	1	1	2	4	3	3	4	4	1	2	3	2	2	3	1	1	1	4	1	2	1	3	4	2	1	3	3	2	2	3	2	3
45	4	1	1	4	3	2	3	4	2	2	2	3	2	4	3	3	1	3	1	4	4	1	3	4	4	1	2	1	4	2	3	1	3	1	4	2	2	1	3	2	1	1	3	3	1	2	3	4	1
46	2	1	3	4	3	2	1	4	2	2	4	1	2	4	1	1	2	1	1	2	4	3	1	4	4	1	4	3	2	2	3	2	1	1	2	2	4	1	1	2	1	1	3	3	1	1	3	2	3
47	4	3	3	4	1	1	1	2	1	1	2	3	1	4	1	1	2	1	1	2	4	3	1	4	4	1	2	1	2	1	3	2	1	1	4	1	2	1	1	4	1	2	3	1	1	1	1	4	1
48	4	3	3	4	1	2	3	2	2	2	4	1	2	4	3	3	2	3	2	2	4	3	3	4	4	2	4	3	2	2	3	1	3	2	2	2	2	1	3	2	2	1	3	3	2	2	1	2	3
49	4	1	1	4	3	2	3	2	2	2	4	3	2	2	1	1	1	3	2	2	4	3	1	4	4	1	4	1	2	1	1	1	3	2	4	2	2	2	1	2	2	1	3	3	2	2	3	4	1
50	4	3	3	4	3	1	3	2	1	2	2	3	2	4	3	3	1	1	1	2	4	3	3	4	4	1	2	3	2	1	3	1	1	1	4	2	2	1	3	2	1	1	3	3	1	2	3	2	1
51	2	1	1	4	3	1	1	2	1	1	2	1	2	4	3	3	2	1	2	2	4	3	1	4	4	1	2	3	2	2	3	1	3	2	4	2	2	1	3	2	1	1	3	3	1	1	1	2	3
52	4	3	3	4	1	1	3	4	2	2	4	1	1	4	1	1	2	3	2	4	2	3	3	4	4	2	4	3	4	1	1	1	3	2	4	1	2	1	1	4	2	1	3	3	2	2	3	4	3
53	2	1	1	4	3	2	3	4	2	1	2	3	2	2	3	1	2	1	1	2	4	3	1	4	4	2	4	3	2	1	3	1	3	1	4	2	2	1	1	2	2	2	3	3	2	2	3	2	3
54	2	1	1	4	3	1	3	2	2	2	2	1	1	4	3	1	2	1	1	2	4	3	3	4	4	2	4	1	2	2	1	1	3	1	2	2	2	1	3	2	1	1	3	3	1	1	3	4	1
55	4	1	1	2	3	1	1	4	2	1	2	3	2	4	3	3	1	1	2	2	4	3	3	4	4	2	4	1	2	1	3	1	3	2	4	1	2	1	1	2	2	1	3	3	2	2	3	4	1
56	4	1	1	2	3	2	3	4	2	2	4	1	2	4	1	1	1	3	1	2	4	3	3	4	4	2	4	1	2	2	3	1	3	1	4	2	4	1	1	2	2	1	3	3	2	1	1	2	1
57	4	3	1	4	3	1	1	4	1	1	2	3	2	4	3	1	2	1	2	2	4	3	3	4	4	2	4	3	2	2	1	1	3	2	2	1	4	1	3	2	2	1	3	3	2	2	3	4	1
58	2	1	1	4	3	2	1	4	2	2	2	3	2	2	1	3	1	1	1	2	4	3	3	4	2	2	2	1	2	1	3	1	1	1	2	2	2	1	1	2	2	1	3	3	2	2	3	2	1
59	2	1	1	4	1	1	1	4	2	1	2	3	2	2	3	3	2	3	2	2	4	3	3	4	2	2	2	3	4	1	1	1	1	2	2	2	4	1	1	2	2	2	1	3	2	1	3	2	3
60	4	1	3	4	3	2	3	2	2	2	2	3	1	4	3	3	1	1	1	2	4	3	3	4	4	2	2	3	2	1	3	2	3	1	2	1	2	2	3	4	2	1	3	3	2	1	3	2	1
61	4	3	1	2	3	1	3	2	1	1	2	1	2	4	1	3	2	1	1	2	4	3	1	4	4	2	2	3	2	2	3	1	1	1	2	2	4	1	1	2	2	1	3	3	2	2	3	2	1
62	2	1	1	4	3	2	3	2	2	2	2	3	2	4	3	3	2	1	1	2	4	3	3	4	2	2	2	1	2	2	3	1	3	1	4	2	2	1	3	2	2	1	3	3	2	2	3	2	1
63	2	1	1	4	3	2	3	2	2	1	2	3	2	4	3	3	2	1	1	4	4	1	3	4	4	2	2	3	2	2	3	1	3	1	4	2	2	1	3	2	2	1	3	3	2	2	3	2	1
64	2	1	1	4	3	2	3	2	2	1	4	3	2	2	3	3	2	1	2	4	4	3	3	4	4	2	4	3	2	2	3	1	1	2	4	2	4	1	3	2	2	2	3	3	2	2	3	4	3
65	4	1	3	4	3	2	3	2	2	2	2	3	1	4	3	3	1	1	2	2	4	1	3	4	2	2	2	3	4	1	3	1	3	2	2	2	2	1	1	2	2	2	3	3	2	2	3	2	3
66	4	3	3	4	1	1	1	4	2	1	2	1	1	4	1	3	1	3	2	2	4	1	1	4	2	2	2	1	2	1	1	1	3	2	2	2	4	1	3	2	2	1	1	3	1	2	3	2	3
67	4	1	1	2	3	1	3	4	1	1	2	3	1	4	3	3	1	1	1	2	4	3	3	4	4	2	2	3	2	2	3	1	3	1	2	1	2	1	1	4	1	2	3	3	1	2	3	4	3
68	4	3	3	4	3	2	3	2	2	1	2	3	1	4	3	3	2	1	1	2	4	3	3	4	2	2	4	1	2	2	1	2	3	1	2	2	2	1	1	2	2	1	3	3	2	1	3	2	3
69	4	1	3	2	3	2	1	4	2	1	2	3	1	4	3	3	2	3	1	4	2	3	3	4	2	2	4	3	2	2	3	2	1	1	2	1	4	1	3	4	2	1	3	3	2	2	1	2	1
70	4	1	3	2	3	1	3	4	2	2	2	3	2	2	3	1	2	3	2	2	4	3	3	4	2	2	2	1	2	1	3	2	3	2	2	2	2	1	1	2	2	1	3	3	2	1	3	2	1
71	4	3	3	2	3	2	1	4	2	1	2	3	2	2	3	1	1	3	2	2	4	1	3	4	4	2	2	1	2	2	1	1	3	2	4	2	2	1	3	2	2	1	1	3	2	1	3	2	1
72	4	1	3	2	1	2	1	4	2	2	4	3	1	2	3	1	1	3	2	4	4	3	3	4	4	2	2	1	4	2	1	1	1	2	2	2	2	1	3	2	2	1	1	3	2	2	3	2	1
73	4	3	3	2	3	2	3	4	2	1	2	3	2	2	3	3	1	3	2	4	2	3	3	2	4	2	2	3	4	2	3	1	1	2	4	2	2	1	3	2	2	1	3	3	2	2	1	2	1
74	2	1	3	4	3	2	3	4	2	2	2	3	2	4	1	3	2	3	2	2	4	3	3	2	2	2	2	1	2	1	3	2	3	2	2	2	4	2	3	2	2	1	3	3	2	1	1	2	3
75	4	1	1	4	3	2	3	4	2	2	2	1	1	2	3	1	2	3	1	4	4	3	3	2	2	2	2	1	2	2	1	2	3	1	4	2	4	2	3	2	2	1	1	3	2	2	3	2	1
76	2	3	3	4	3	2	1	4	2	2	2	3	2	4	3	1	2	1	1	2	2	3	3	4	4	2	2	3	4	1	3	2	3	1	2	1	2	2	3	2	2	1	3	1	2	2	3	2	1
77	4	1	3	2	3	2	3	2	2	2	2	3	2	2	3	3	2	1	2	2	4	3	3	4	4	2	2	3	4	2	1	2	3	2	2	1	2	2	3	2	2	1	3	1	2	2	3	2	1
78	4	3	3	4	3	2	1	4	2	2	2	1	2	4	3	3	2	3	2	2	4	1	3	4	2	2	2	1	2	2	1	2	3	2	2	1	2	1	1	2	2	1	1	1	2	2	3	2	1
79	4	3	1	2	1	2	3	4	2	1	4	3	2	2	3	3	1	1	1	2	2	3	3	2	2	2	2	3	4	2	1	1	3	1	4	1	4	1	1	2	2	1	3	1	2	2	3	2	1
80	4	1	1	2	3	2	3	4	2	2	2	1	1	2	3	3	2	1	2	2	4	3	1	4	2	2	4	3	4	2	3	2	1	2	4	1	4	1	1	4	2	2	3	1	2	2	3	4	3
81	4	3	3	4	3	2	1	2	2	2	2	1	2	2	1	1	1	1	2	4	4	3	3	4	4	2	4	3	4	2	1	2	3	2	4	1	4	2	3	2	2	1	3	1	2	2	1	4	3
82	2	1	3	4	3	2	3	4	2	2	2	1	2	4	3	3	2	3	2	2	4	1	1	4	4	2	4	3	2	2	1	2	3	2	4	1	4	1	1	2	2	2	3	1	2	2	3	4	1
83	4	1	1	2	1	2	3	4	2	1	4	1	1	2	1	1	1	3	2	2	4	1	1	4	4	2	4	1	4	2	1	1	1	2	4	1	2	1	1	2	2	1	3	1	2	1	3	4	1
84	4	3	1	4	3	2	3	2	2	2	2	1	1	2	1	1	1	1	2	4	4	1	1	4	2	2	4	1	4	2	3	2	1	2	4	1	4	2	1	4	2	1	1	1	2	2	1	4	3
85	4	3	3	4	1	2	3	2	2	1	2	1	2	4	1	3	2	1	2	4	4	3	3	4	4	2	4	3	2	2	1	2	3	2	4	1	2	2	1	2	2	1	3	1	2	2	1	4	3
86	4	3	3	4	3	1	3	2	1	2	2	1	2	4	3	1	2	3	1	4	4	3	1	4	2	2	4	3	4	2	3	2	3	1	4	1	2	1	1	2	2	2	3	1	2	2	3	2	3
87	2	3	3	4	3	2	1	4	2	2	2	1	2	4	1	3	1	1	2	2	4	3	1	4	2	2	4	3	2	2	1	2	3	2	2	1	4	1	1	2	2	1	3	1	1	2	3	2	1
88	2	3	3	4	3	2	3	4	2	2	2	1	2	2	3	3	2	3	2	2	4	1	1	4	4	2	4	3	2	2	3	2	3	2	4	1	2	2	1	2	2	1	3	1	2	2	3	4	1
89	4	3	1	4	3	2	3	4	2	1	2	1	1	2	3	3	2	3	2	2	2	1	1	4	2	2	4	1	2	2	3	2	1	2	4	1	4	1	1	4	2	1	1	1	2	2	3	4	1
90	4	1	3	4	3	2	3	4	2	1	4	1	2	2	3	3	1	1	2	4	2	1	3	4	4	2	4	3	2	2	3	1	3	2	4	1	2	1	1	2	2	1	3	1	2	2	3	4	3
91	4	3	3	4	1	2	3	2	2	1	2	3	1	4	1	1	2	1	2	2	4	3	1	4	4	2	4	1	4	2	3	1	1	2	4	1	2	1	1	4	2	1	3	1	2	1	3	4	3
92	2	1	1	4	3	2	3	4	2	1	2	1	2	4	1	1	1	1	2	2	2	3	1	4	4	2	4	3	2	2	3	1	3	2	4	1	2	1	1	2	2	1	3	1	2	2	3	4	3
93	4	3	3	2	3	2	3	2	2	2	2	1	1	4	1	1	2	1	2	2	4	3	3	4	4	2	2	3	4	2	3	2	1	2	4	2	2	1	1	4	2	1	1	3	2	2	3	4	3
94	4	3	3	2	3	2	3	4	2	1	2	1	2	4	1	1	2	1	2	2	4	1	3	4	4	2	2	1	2	2	3	2	3	2	4	1	4	1	3	4	2	1	1	3	2	2	3	4	3
95	4	1	3	2	1	2	1	4	2	2	4	1	1	4	1	1	2	1	2	2	2	1	3	4	2	2	2	3	2	2	3	2	3	2	4	2	2	1	1	4	2	2	3	3	2	2	3	4	1
96	4	3	3	2	1	2	3	4	2	2	4	1	1	2	3	3	1	3	2	2	4	1	3	2	4	2	2	3	2	2	1	2	1	2	4	1	2	2	3	4	2	1	1	3	2	2	3	4	3
97	4	1	3	4	4	1	3	2	1	2	4	1	2	2	3	3	1	1	1	2	4	3	1	4	4	1	4	1	4	1	1	2	1	1	2	2	4	2	1	4	1	2	1	1	1	2	3	4	3
98	2	1	3	4	2	1	3	2	1	2	2	3	2	4	1	3	2	1	1	2	2	1	1	4	4	1	4	1	2	1	1	2	1	1	2	2	4	1	1	2	1	1	3	1	1	1	1	4	1
99	2	3	1	4	4	2	3	4	2	2	2	1	1	2	1	3	2	3	2	4	2	1	3	4	4	2	4	1	2	2	1	2	1	2	4	2	4	1	1	2	2	1	3	3	2	1	3	4	1
100	2	3	3	4	4	2	1	2	2	2	2	3	1	2	3	3	1	1	2	2	2	1	3	4	2	2	4	1	4	2	3	2	1	2	4	1	4	2	3	4	2	1	1	3	2	2	3	4	1
101	2	3	3	4	2	2	1	2	2	2	4	1	2	2	3	1	1	3	2	4	4	1	3	4	4	2	4	3	2	2	3	1	3	1	4	2	4	1	3	4	2	2	1	3	2	2	3	4	1
102	2	3	3	4	2	1	3	2	1	2	4	3	2	4	3	1	1	1	1	2	4	1	3	2	2	1	4	1	4	1	1	2	3	1	4	2	4	1	1	4	1	2	3	3	1	2	3	4	1
103	2	3	1	4	2	1	1	2	1	2	4	1	2	2	1	1	1	3	1	4	4	1	1	2	2	1	4	3	4	1	1	2	3	1	2	2	4	2	3	4	1	1	3	3	1	1	1	4	1
1	4	3	3	2	3	1	3	4	1	2	4	3	1	4	1	1	1	3	1	2	4	3	1	4	4	1	2	1	4	2	3	1	3	1	2	2	2	1	1	4	2	1	1	3	1	2	3	4	1
2	4	1	1	4	3	2	1	4	2	2	2	1	1	4	1	1	2	1	1	2	4	3	1	4	4	1	2	3	2	1	1	1	3	1	2	2	2	2	1	4	1	1	3	3	1	2	3	2	1
3	4	3	3	4	1	1	1	4	1	2	4	1	2	4	1	3	1	3	1	4	4	1	1	4	4	1	4	3	2	1	3	1	1	1	2	1	2	1	1	4	2	1	1	3	1	2	3	2	1
4	4	1	1	2	3	1	3	2	1	1	4	1	1	4	1	1	1	3	1	2	4	3	1	4	4	1	4	1	2	2	1	1	3	1	2	2	2	1	3	4	1	1	3	1	1	2	1	2	3
5	2	1	3	2	1	2	3	4	2	1	2	1	2	4	3	1	1	1	1	2	4	3	3	4	4	1	2	3	4	1	1	1	3	1	2	1	2	1	3	2	1	1	3	1	1	2	3	2	3
6	2	3	1	2	3	1	1	4	2	2	4	1	2	2	1	3	2	1	1	4	4	3	3	4	4	1	2	3	2	2	3	1	3	1	4	1	2	2	3	2	1	2	3	3	2	2	3	2	1
7	2	1	1	2	3	1	1	4	2	1	2	1	1	2	1	1	2	1	1	4	2	3	3	2	4	1	2	1	4	1	3	1	1	1	2	2	4	2	1	2	1	2	3	1	1	1	1	2	3
8	2	3	3	2	3	1	1	2	1	2	2	1	2	4	1	1	1	1	1	2	2	3	3	4	4	1	4	3	2	1	3	1	1	1	4	1	2	1	3	2	1	1	3	3	2	2	3	2	1
9	2	1	1	2	3	2	3	4	2	2	2	1	2	2	1	3	1	1	1	2	2	3	3	4	4	1	2	1	2	2	3	1	3	1	2	1	2	2	1	4	1	1	3	1	1	1	3	4	3
10	2	3	1	2	1	1	1	4	1	1	4	1	1	2	1	3	2	3	1	2	4	3	1	4	4	1	2	1	2	2	3	1	3	1	2	1	4	1	1	4	1	1	3	1	1	1	3	4	1
11	2	3	3	2	1	2	3	4	2	2	4	3	1	2	1	3	2	3	1	4	4	1	1	4	4	1	4	1	2	2	1	1	1	1	4	2	2	1	1	4	2	1	3	3	2	2	3	4	3
12	2	3	3	2	3	2	1	4	2	2	2	1	2	2	1	3	2	1	1	4	4	1	1	4	4	1	2	1	2	2	3	1	1	1	4	1	2	1	3	2	1	1	3	3	2	2	3	2	3
13	4	3	3	2	3	2	3	4	1	1	4	3	2	4	1	3	2	3	1	2	4	3	1	4	4	1	2	3	4	2	3	1	3	1	4	2	2	1	1	4	1	1	3	3	2	2	3	4	3
14	4	1	3	2	3	1	3	2	1	2	2	1	2	4	3	1	1	1	1	2	4	1	3	4	4	1	4	1	4	1	3	1	3	1	4	1	2	1	3	4	2	1	3	3	2	2	1	2	1
15	4	3	3	2	1	1	3	4	2	2	2	1	1	4	3	1	2	1	1	2	4	3	3	4	2	1	2	3	4	1	1	1	3	1	2	2	2	1	3	2	1	1	3	1	1	1	3	2	1
16	2	3	1	2	3	1	1	4	1	1	2	1	2	4	1	1	1	3	1	2	4	3	1	4	4	1	4	3	4	1	3	1	3	1	2	1	2	1	1	2	1	2	1	3	1	2	3	2	1
17	4	3	3	2	1	2	1	4	1	2	2	1	2	4	1	3	2	3	1	2	4	1	3	4	4	1	2	1	2	1	3	2	3	1	2	1	2	2	1	4	1	1	1	3	1	1	3	2	1
18	4	3	3	2	3	2	1	2	2	2	2	3	2	4	1	3	2	1	1	4	4	3	3	4	4	1	2	3	2	1	3	2	3	1	2	1	4	1	3	4	1	1	3	1	1	2	3	2	1
19	2	3	3	2	3	1	1	4	1	1	2	1	2	4	3	1	1	3	1	2	2	3	3	4	4	1	2	1	4	1	3	1	3	1	4	2	2	1	3	2	2	1	3	1	2	2	3	2	1
20	4	1	1	2	3	2	3	4	2	1	2	1	2	4	3	3	1	1	1	2	4	3	3	4	4	1	4	3	2	2	3	2	3	1	2	2	4	1	3	4	1	2	3	3	1	2	3	4	1
21	4	3	1	4	3	2	1	4	2	1	4	1	1	4	3	1	2	3	1	2	4	3	3	4	4	1	4	3	2	1	3	2	3	1	2	1	4	1	3	4	2	1	1	3	1	2	3	2	1
22	4	3	1	2	3	1	3	4	1	2	4	1	1	2	3	1	1	3	1	4	4	3	3	4	4	2	2	3	4	2	3	1	3	1	2	1	4	1	3	4	1	1	1	3	1	1	3	4	1
23	4	1	1	2	3	1	1	4	1	1	2	1	1	4	3	1	2	1	1	2	4	3	3	4	4	1	4	1	2	1	3	1	3	1	2	1	4	2	3	4	1	1	1	1	1	1	1	2	1
24	4	3	3	2	3	1	1	2	1	1	4	3	1	4	1	1	2	3	1	4	2	3	1	4	2	1	2	3	4	1	3	1	1	1	2	2	4	1	1	4	1	1	1	1	1	1	3	2	1
25	4	3	3	2	3	1	3	4	1	2	2	1	2	4	3	3	1	1	1	2	4	3	3	4	4	1	4	1	4	2	3	1	3	1	4	2	4	1	3	4	1	1	3	3	1	2	3	2	1
26	4	1	1	2	3	2	1	4	1	1	4	3	2	4	3	3	1	3	1	2	4	1	3	4	4	1	4	1	2	2	1	2	3	1	4	1	2	1	3	4	1	1	3	3	2	2	1	2	1
27	4	3	1	4	3	2	3	4	2	2	4	3	1	4	1	3	2	1	2	2	4	1	1	4	2	1	4	1	2	2	3	1	1	2	4	2	4	1	1	2	2	1	3	3	2	2	1	4	1
28	4	3	3	4	3	1	3	4	2	1	2	3	1	4	1	3	2	1	1	4	4	1	1	4	4	1	4	3	2	2	3	2	1	1	4	2	4	2	1	2	2	1	3	3	2	2	3	2	1
29	4	1	1	4	3	2	3	4	1	2	2	1	2	2	3	3	1	1	1	2	4	1	3	4	4	1	4	3	2	2	1	1	3	1	4	1	4	1	1	4	1	1	3	3	1	2	3	4	3
30	4	3	3	4	3	1	3	2	1	1	2	1	2	4	3	1	1	1	1	2	4	1	3	4	4	1	4	3	2	1	3	1	3	1	4	2	4	2	1	4	1	1	3	3	1	2	3	4	1
31	2	3	3	4	3	1	1	4	2	2	2	3	2	2	1	1	2	3	1	4	4	1	3	4	4	1	4	3	4	1	1	1	3	1	4	2	4	1	1	2	2	2	1	3	2	2	3	2	1
32	4	1	1	4	3	1	3	2	1	1	2	3	1	4	1	1	2	1	1	2	4	1	1	4	4	1	4	3	2	1	3	1	1	1	4	2	2	1	1	4	1	1	3	3	1	2	3	2	3
33	4	3	3	4	3	2	3	4	2	2	4	1	1	4	3	3	1	1	1	2	4	1	3	4	4	2	4	1	2	2	3	2	3	1	4	1	2	1	1	4	2	1	3	3	2	2	3	4	1
34	2	1	1	4	3	1	3	4	2	2	4	3	2	4	1	1	2	3	1	2	4	1	3	4	4	1	4	1	2	2	3	1	3	1	4	2	4	2	1	2	2	1	3	1	2	2	3	4	3
35	4	1	1	4	3	1	3	4	1	1	2	3	1	4	1	3	2	1	1	2	4	1	1	4	4	1	4	1	2	1	3	2	1	1	2	1	2	1	1	4	1	1	3	1	1	2	3	4	1
36	2	3	3	2	3	1	3	4	1	1	2	3	2	4	1	3	1	1	1	2	4	1	1	4	4	1	2	3	2	2	3	1	1	1	4	1	2	2	1	2	1	1	3	1	1	2	3	4	3
37	2	3	3	2	3	1	3	4	1	2	2	1	2	4	1	1	1	1	1	2	4	3	1	4	4	2	2	3	2	2	3	1	1	1	4	2	4	2	3	2	1	1	3	3	1	2	3	2	1
38	4	3	3	4	3	1	1	4	1	2	4	1	1	2	1	1	2	3	1	2	4	1	1	4	4	2	4	1	2	2	3	1	1	1	4	1	4	1	3	4	2	1	3	3	2	1	3	4	1
39	4	1	1	4	3	1	1	4	1	1	4	3	1	2	1	3	2	3	1	2	4	3	3	4	4	1	4	1	2	2	3	2	3	1	4	2	4	1	1	4	1	1	3	1	1	2	3	4	3
40	4	3	3	4	3	2	3	4	2	2	4	3	2	4	1	1	1	3	1	4	4	1	3	4	4	2	4	1	4	2	3	2	3	1	2	2	4	1	1	4	1	1	1	3	1	2	3	4	3
41	2	1	1	4	3	1	3	2	2	2	4	3	2	4	3	3	2	1	1	2	4	1	3	4	4	1	4	3	2	1	3	1	1	1	4	2	2	1	1	2	2	1	3	1	2	1	3	2	3
42	4	1	1	4	3	1	3	4	1	2	4	1	1	4	3	3	1	1	1	2	4	1	3	4	4	1	4	1	2	1	3	2	3	1	4	1	2	1	1	4	2	1	3	3	2	2	3	4	1
43	4	1	1	4	3	1	3	4	1	2	2	3	1	4	1	3	2	1	1	2	4	3	1	4	4	1	4	3	2	2	3	2	1	1	4	2	4	1	1	4	2	1	3	3	2	2	3	4	3
44	4	3	3	4	3	2	3	2	2	2	2	3	1	4	1	3	2	1	1	2	4	3	3	4	4	1	2	3	2	2	3	1	1	1	4	1	2	1	3	4	2	1	3	3	2	2	3	2	3
45	4	1	1	4	3	2	3	4	2	2	2	3	2	4	3	3	1	3	1	4	4	1	3	4	4	1	2	1	4	2	3	1	3	1	4	2	2	1	3	2	1	1	3	3	1	2	3	4	1
46	2	1	3	4	3	2	1	4	2	2	4	1	2	4	1	1	2	1	1	2	4	3	1	4	4	1	4	3	2	2	3	2	1	1	2	2	4	1	1	2	1	1	3	3	1	1	3	2	3
47	4	3	3	4	1	1	1	2	1	1	2	3	1	4	1	1	2	1	1	2	4	3	1	4	4	1	2	1	2	1	3	2	1	1	4	1	2	1	1	4	1	2	3	1	1	1	1	4	1
48	4	3	3	4	1	2	3	2	2	2	4	1	2	4	3	3	2	3	2	2	4	3	3	4	4	2	4	3	2	2	3	1	3	2	2	2	2	1	3	2	2	1	3	3	2	2	1	2	3
49	4	1	1	4	3	2	3	2	2	2	4	3	2	2	1	1	1	3	2	2	4	3	1	4	4	1	4	1	2	1	1	1	3	2	4	2	2	2	1	2	2	1	3	3	2	2	3	4	1
50	4	3	3	4	3	1	3	2	1	2	2	3	2	4	3	3	1	1	1	2	4	3	3	4	4	1	2	3	2	1	3	1	1	1	4	2	2	1	3	2	1	1	3	3	1	2	3	2	1
51	2	1	1	4	3	1	1	2	1	1	2	1	2	4	3	3	2	1	2	2	4	3	1	4	4	1	2	3	2	2	3	1	3	2	4	2	2	1	3	2	1	1	3	3	1	1	1	2	3
52	4	3	3	4	1	1	3	4	2	2	4	1	1	4	1	1	2	3	2	4	2	3	3	4	4	2	4	3	4	1	1	1	3	2	4	1	2	1	1	4	2	1	3	3	2	2	3	4	3
53	2	1	1	4	3	2	3	4	2	1	2	3	2	2	3	1	2	1	1	2	4	3	1	4	4	2	4	3	2	1	3	1	3	1	4	2	2	1	1	2	2	2	3	3	2	2	3	2	3
54	2	1	1	4	3	1	3	2	2	2	2	1	1	4	3	1	2	1	1	2	4	3	3	4	4	2	4	1	2	2	1	1	3	1	2	2	2	1	3	2	1	1	3	3	1	1	3	4	1
55	4	1	1	2	3	1	1	4	2	1	2	3	2	4	3	3	1	1	2	2	4	3	3	4	4	2	4	1	2	1	3	1	3	2	4	1	2	1	1	2	2	1	3	3	2	2	3	4	1
56	4	1	1	2	3	2	3	4	2	2	4	1	2	4	1	1	1	3	1	2	4	3	3	4	4	2	4	1	2	2	3	1	3	1	4	2	4	1	1	2	2	1	3	3	2	1	1	2	1
57	4	3	1	4	3	1	1	4	1	1	2	3	2	4	3	1	2	1	2	2	4	3	3	4	4	2	4	3	2	2	1	1	3	2	2	1	4	1	3	2	2	1	3	3	2	2	3	4	1
58	2	1	1	4	3	2	1	4	2	2	2	3	2	2	1	3	1	1	1	2	4	3	3	4	2	2	2	1	2	1	3	1	1	1	2	2	2	1	1	2	2	1	3	3	2	2	3	2	1
59	2	1	1	4	1	1	1	4	2	1	2	3	2	2	3	3	2	3	2	2	4	3	3	4	2	2	2	3	4	1	1	1	1	2	2	2	4	1	1	2	2	2	1	3	2	1	3	2	3
60	4	1	3	4	3	2	3	2	2	2	2	3	1	4	3	3	1	1	1	2	4	3	3	4	4	2	2	3	2	1	3	2	3	1	2	1	2	2	3	4	2	1	3	3	2	1	3	2	1
61	4	3	1	2	3	1	3	2	1	1	2	1	2	4	1	3	2	1	1	2	4	3	1	4	4	2	2	3	2	2	3	1	1	1	2	2	4	1	1	2	2	1	3	3	2	2	3	2	1
62	2	1	1	4	3	2	3	2	2	2	2	3	2	4	3	3	2	1	1	2	4	3	3	4	2	2	2	1	2	2	3	1	3	1	4	2	2	1	3	2	2	1	3	3	2	2	3	2	1
63	2	1	1	4	3	2	3	2	2	1	2	3	2	4	3	3	2	1	1	4	4	1	3	4	4	2	2	3	2	2	3	1	3	1	4	2	2	1	3	2	2	1	3	3	2	2	3	2	1
64	2	1	1	4	3	2	3	2	2	1	4	3	2	2	3	3	2	1	2	4	4	3	3	4	4	2	4	3	2	2	3	1	1	2	4	2	4	1	3	2	2	2	3	3	2	2	3	4	3
65	4	1	3	4	3	2	3	2	2	2	2	3	1	4	3	3	1	1	2	2	4	1	3	4	2	2	2	3	4	1	3	1	3	2	2	2	2	1	1	2	2	2	3	3	2	2	3	2	3
66	4	3	3	4	1	1	1	4	2	1	2	1	1	4	1	3	1	3	2	2	4	1	1	4	2	2	2	1	2	1	1	1	3	2	2	2	4	1	3	2	2	1	1	3	1	2	3	2	3
67	4	1	1	2	3	1	3	4	1	1	2	3	1	4	3	3	1	1	1	2	4	3	3	4	4	2	2	3	2	2	3	1	3	1	2	1	2	1	1	4	1	2	3	3	1	2	3	4	3
68	4	3	3	4	3	2	3	2	2	1	2	3	1	4	3	3	2	1	1	2	4	3	3	4	2	2	4	1	2	2	1	2	3	1	2	2	2	1	1	2	2	1	3	3	2	1	3	2	3
69	4	1	3	2	3	2	1	4	2	1	2	3	1	4	3	3	2	3	1	4	2	3	3	4	2	2	4	3	2	2	3	2	1	1	2	1	4	1	3	4	2	1	3	3	2	2	1	2	1
70	4	1	3	2	3	1	3	4	2	2	2	3	2	2	3	1	2	3	2	2	4	3	3	4	2	2	2	1	2	1	3	2	3	2	2	2	2	1	1	2	2	1	3	3	2	1	3	2	1
71	4	3	3	2	3	2	1	4	2	1	2	3	2	2	3	1	1	3	2	2	4	1	3	4	4	2	2	1	2	2	1	1	3	2	4	2	2	1	3	2	2	1	1	3	2	1	3	2	1
72	4	1	3	2	1	2	1	4	2	2	4	3	1	2	3	1	1	3	2	4	4	3	3	4	4	2	2	1	4	2	1	1	1	2	2	2	2	1	3	2	2	1	1	3	2	2	3	2	1
73	4	3	3	2	3	2	3	4	2	1	2	3	2	2	3	3	1	3	2	4	2	3	3	2	4	2	2	3	4	2	3	1	1	2	4	2	2	1	3	2	2	1	3	3	2	2	1	2	1
74	2	1	3	4	3	2	3	4	2	2	2	3	2	4	1	3	2	3	2	2	4	3	3	2	2	2	2	1	2	1	3	2	3	2	2	2	4	2	3	2	2	1	3	3	2	1	1	2	3
75	4	1	1	4	3	2	3	4	2	2	2	1	1	2	3	1	2	3	1	4	4	3	3	2	2	2	2	1	2	2	1	2	3	1	4	2	4	2	3	2	2	1	1	3	2	2	3	2	1
76	2	3	3	4	3	2	1	4	2	2	2	3	2	4	3	1	2	1	1	2	2	3	3	4	4	2	2	3	4	1	3	2	3	1	2	1	2	2	3	2	2	1	3	1	2	2	3	2	1
77	4	1	3	2	3	2	3	2	2	2	2	3	2	2	3	3	2	1	2	2	4	3	3	4	4	2	2	3	4	2	1	2	3	2	2	1	2	2	3	2	2	1	3	1	2	2	3	2	1
78	4	3	3	4	3	2	1	4	2	2	2	1	2	4	3	3	2	3	2	2	4	1	3	4	2	2	2	1	2	2	1	2	3	2	2	1	2	1	1	2	2	1	1	1	2	2	3	2	1
79	4	3	1	2	1	2	3	4	2	1	4	3	2	2	3	3	1	1	1	2	2	3	3	2	2	2	2	3	4	2	1	1	3	1	4	1	4	1	1	2	2	1	3	1	2	2	3	2	1
80	4	1	1	2	3	2	3	4	2	2	2	1	1	2	3	3	2	1	2	2	4	3	1	4	2	2	4	3	4	2	3	2	1	2	4	1	4	1	1	4	2	2	3	1	2	2	3	4	3
81	4	3	3	4	3	2	1	2	2	2	2	1	2	2	1	1	1	1	2	4	4	3	3	4	4	2	4	3	4	2	1	2	3	2	4	1	4	2	3	2	2	1	3	1	2	2	1	4	3
82	2	1	3	4	3	2	3	4	2	2	2	1	2	4	3	3	2	3	2	2	4	1	1	4	4	2	4	3	2	2	1	2	3	2	4	1	4	1	1	2	2	2	3	1	2	2	3	4	1
83	4	1	1	2	1	2	3	4	2	1	4	1	1	2	1	1	1	3	2	2	4	1	1	4	4	2	4	1	4	2	1	1	1	2	4	1	2	1	1	2	2	1	3	1	2	1	3	4	1
84	4	3	1	4	3	2	3	2	2	2	2	1	1	2	1	1	1	1	2	4	4	1	1	4	2	2	4	1	4	2	3	2	1	2	4	1	4	2	1	4	2	1	1	1	2	2	1	4	3
85	4	3	3	4	1	2	3	2	2	1	2	1	2	4	1	3	2	1	2	4	4	3	3	4	4	2	4	3	2	2	1	2	3	2	4	1	2	2	1	2	2	1	3	1	2	2	1	4	3
86	4	3	3	4	3	1	3	2	1	2	2	1	2	4	3	1	2	3	1	4	4	3	1	4	2	2	4	3	4	2	3	2	3	1	4	1	2	1	1	2	2	2	3	1	2	2	3	2	3
87	2	3	3	4	3	2	1	4	2	2	2	1	2	4	1	3	1	1	2	2	4	3	1	4	2	2	4	3	2	2	1	2	3	2	2	1	4	1	1	2	2	1	3	1	1	2	3	2	1
88	2	3	3	4	3	2	3	4	2	2	2	1	2	2	3	3	2	3	2	2	4	1	1	4	4	2	4	3	2	2	3	2	3	2	4	1	2	2	1	2	2	1	3	1	2	2	3	4	1
89	4	3	1	4	3	2	3	4	2	1	2	1	1	2	3	3	2	3	2	2	2	1	1	4	2	2	4	1	2	2	3	2	1	2	4	1	4	1	1	4	2	1	1	1	2	2	3	4	1
90	4	1	3	4	3	2	3	4	2	1	4	1	2	2	3	3	1	1	2	4	2	1	3	4	4	2	4	3	2	2	3	1	3	2	4	1	2	1	1	2	2	1	3	1	2	2	3	4	3
91	4	3	3	4	1	2	3	2	2	1	2	3	1	4	1	1	2	1	2	2	4	3	1	4	4	2	4	1	4	2	3	1	1	2	4	1	2	1	1	4	2	1	3	1	2	1	3	4	3
92	2	1	1	4	3	2	3	4	2	1	2	1	2	4	1	1	1	1	2	2	2	3	1	4	4	2	4	3	2	2	3	1	3	2	4	1	2	1	1	2	2	1	3	1	2	2	3	4	3
93	4	3	3	2	3	2	3	2	2	2	2	1	1	4	1	1	2	1	2	2	4	3	3	4	4	2	2	3	4	2	3	2	1	2	4	2	2	1	1	4	2	1	1	3	2	2	3	4	3
94	4	3	3	2	3	2	3	4	2	1	2	1	2	4	1	1	2	1	2	2	4	1	3	4	4	2	2	1	2	2	3	2	3	2	4	1	4	1	3	4	2	1	1	3	2	2	3	4	3
95	4	1	3	2	1	2	1	4	2	2	4	1	1	4	1	1	2	1	2	2	2	1	3	4	2	2	2	3	2	2	3	2	3	2	4	2	2	1	1	4	2	2	3	3	2	2	3	4	1
96	4	3	3	2	1	2	3	4	2	2	4	1	1	2	3	3	1	3	2	2	4	1	3	2	4	2	2	3	2	2	1	2	1	2	4	1	2	2	3	4	2	1	1	3	2	2	3	4	3
97	4	1	3	4	4	1	3	2	1	2	4	1	2	2	3	3	1	1	1	2	4	3	1	4	4	1	4	1	4	1	1	2	1	1	2	2	4	2	1	4	1	2	1	1	1	2	3	4	3
98	2	1	3	4	2	1	3	2	1	2	2	3	2	4	1	3	2	1	1	2	2	1	1	4	4	1	4	1	2	1	1	2	1	1	2	2	4	1	1	2	1	1	3	1	1	1	1	4	1
99	2	3	1	4	4	2	3	4	2	2	2	1	1	2	1	3	2	3	2	4	2	1	3	4	4	2	4	1	2	2	1	2	1	2	4	2	4	1	1	2	2	1	3	3	2	1	3	4	1
100	2	3	3	4	4	2	1	2	2	2	2	3	1	2	3	3	1	1	2	2	2	1	3	4	2	2	4	1	4	2	3	2	1	2	4	1	4	2	3	4	2	1	1	3	2	2	3	4	1
101	2	3	3	4	2	2	1	2	2	2	4	1	2	2	3	1	1	3	2	4	4	1	3	4	4	2	4	3	2	2	3	1	3	1	4	2	4	1	3	4	2	2	1	3	2	2	3	4	1
102	2	3	3	4	2	1	3	2	1	2	4	3	2	4	3	1	1	1	1	2	4	1	3	2	2	1	4	1	4	1	1	2	3	1	4	2	4	1	1	4	1	2	3	3	1	2	3	4	1
103	2	3	1	4	2	1	1	2	1	2	4	1	2	2	1	1	1	3	1	4	4	1	1	2	2	1	4	3	4	1	1	2	3	1	2	2	4	2	3	4	1	1	3	3	1	1	1	4	1
1	4	3	3	2	3	1	3	4	1	2	4	3	1	4	1	1	1	3	1	2	4	3	1	4	4	1	2	1	4	2	3	1	3	1	2	2	2	1	1	4	2	1	1	3	1	2	3	4	1
2	4	1	1	4	3	2	1	4	2	2	2	1	1	4	1	1	2	1	1	2	4	3	1	4	4	1	2	3	2	1	1	1	3	1	2	2	2	2	1	4	1	1	3	3	1	2	3	2	1
3	4	3	3	4	1	1	1	4	1	2	4	1	2	4	1	3	1	3	1	4	4	1	1	4	4	1	4	3	2	1	3	1	1	1	2	1	2	1	1	4	2	1	1	3	1	2	3	2	1
4	4	1	1	2	3	1	3	2	1	1	4	1	1	4	1	1	1	3	1	2	4	3	1	4	4	1	4	1	2	2	1	1	3	1	2	2	2	1	3	4	1	1	3	1	1	2	1	2	3
5	2	1	3	2	1	2	3	4	2	1	2	1	2	4	3	1	1	1	1	2	4	3	3	4	4	1	2	3	4	1	1	1	3	1	2	1	2	1	3	2	1	1	3	1	1	2	3	2	3
6	2	3	1	2	3	1	1	4	2	2	4	1	2	2	1	3	2	1	1	4	4	3	3	4	4	1	2	3	2	2	3	1	3	1	4	1	2	2	3	2	1	2	3	3	2	2	3	2	1
7	2	1	1	2	3	1	1	4	2	1	2	1	1	2	1	1	2	1	1	4	2	3	3	2	4	1	2	1	4	1	3	1	1	1	2	2	4	2	1	2	1	2	3	1	1	1	1	2	3
8	2	3	3	2	3	1	1	2	1	2	2	1	2	4	1	1	1	1	1	2	2	3	3	4	4	1	4	3	2	1	3	1	1	1	4	1	2	1	3	2	1	1	3	3	2	2	3	2	1
9	2	1	1	2	3	2	3	4	2	2	2	1	2	2	1	3	1	1	1	2	2	3	3	4	4	1	2	1	2	2	3	1	3	1	2	1	2	2	1	4	1	1	3	1	1	1	3	4	3
10	2	3	1	2	1	1	1	4	1	1	4	1	1	2	1	3	2	3	1	2	4	3	1	4	4	1	2	1	2	2	3	1	3	1	2	1	4	1	1	4	1	1	3	1	1	1	3	4	1
11	2	3	3	2	1	2	3	4	2	2	4	3	1	2	1	3	2	3	1	4	4	1	1	4	4	1	4	1	2	2	1	1	1	1	4	2	2	1	1	4	2	1	3	3	2	2	3	4	3
12	2	3	3	2	3	2	1	4	2	2	2	1	2	2	1	3	2	1	1	4	4	1	1	4	4	1	2	1	2	2	3	1	1	1	4	1	2	1	3	2	1	1	3	3	2	2	3	2	3
13	4	3	3	2	3	2	3	4	1	1	4	3	2	4	1	3	2	3	1	2	4	3	1	4	4	1	2	3	4	2	3	1	3	1	4	2	2	1	1	4	1	1	3	3	2	2	3	4	3
14	4	1	3	2	3	1	3	2	1	2	2	1	2	4	3	1	1	1	1	2	4	1	3	4	4	1	4	1	4	1	3	1	3	1	4	1	2	1	3	4	2	1	3	3	2	2	1	2	1
15	4	3	3	2	1	1	3	4	2	2	2	1	1	4	3	1	2	1	1	2	4	3	3	4	2	1	2	3	4	1	1	1	3	1	2	2	2	1	3	2	1	1	3	1	1	1	3	2	1
16	2	3	1	2	3	1	1	4	1	1	2	1	2	4	1	1	1	3	1	2	4	3	1	4	4	1	4	3	4	1	3	1	3	1	2	1	2	1	1	2	1	2	1	3	1	2	3	2	1
17	4	3	3	2	1	2	1	4	1	2	2	1	2	4	1	3	2	3	1	2	4	1	3	4	4	1	2	1	2	1	3	2	3	1	2	1	2	2	1	4	1	1	1	3	1	1	3	2	1
18	4	3	3	2	3	2	1	2	2	2	2	3	2	4	1	3	2	1	1	4	4	3	3	4	4	1	2	3	2	1	3	2	3	1	2	1	4	1	3	4	1	1	3	1	1	2	3	2	1
19	2	3	3	2	3	1	1	4	1	1	2	1	2	4	3	1	1	3	1	2	2	3	3	4	4	1	2	1	4	1	3	1	3	1	4	2	2	1	3	2	2	1	3	1	2	2	3	2	1
20	4	1	1	2	3	2	3	4	2	1	2	1	2	4	3	3	1	1	1	2	4	3	3	4	4	1	4	3	2	2	3	2	3	1	2	2	4	1	3	4	1	2	3	3	1	2	3	4	1
21	4	3	1	4	3	2	1	4	2	1	4	1	1	4	3	1	2	3	1	2	4	3	3	4	4	1	4	3	2	1	3	2	3	1	2	1	4	1	3	4	2	1	1	3	1	2	3	2	1
22	4	3	1	2	3	1	3	4	1	2	4	1	1	2	3	1	1	3	1	4	4	3	3	4	4	2	2	3	4	2	3	1	3	1	2	1	4	1	3	4	1	1	1	3	1	1	3	4	1
23	4	1	1	2	3	1	1	4	1	1	2	1	1	4	3	1	2	1	1	2	4	3	3	4	4	1	4	1	2	1	3	1	3	1	2	1	4	2	3	4	1	1	1	1	1	1	1	2	1
24	4	3	3	2	3	1	1	2	1	1	4	3	1	4	1	1	2	3	1	4	2	3	1	4	2	1	2	3	4	1	3	1	1	1	2	2	4	1	1	4	1	1	1	1	1	1	3	2	1
25	4	3	3	2	3	1	3	4	1	2	2	1	2	4	3	3	1	1	1	2	4	3	3	4	4	1	4	1	4	2	3	1	3	1	4	2	4	1	3	4	1	1	3	3	1	2	3	2	1
26	4	1	1	2	3	2	1	4	1	1	4	3	2	4	3	3	1	3	1	2	4	1	3	4	4	1	4	1	2	2	1	2	3	1	4	1	2	1	3	4	1	1	3	3	2	2	1	2	1
27	4	3	1	4	3	2	3	4	2	2	4	3	1	4	1	3	2	1	2	2	4	1	1	4	2	1	4	1	2	2	3	1	1	2	4	2	4	1	1	2	2	1	3	3	2	2	1	4	1
28	4	3	3	4	3	1	3	4	2	1	2	3	1	4	1	3	2	1	1	4	4	1	1	4	4	1	4	3	2	2	3	2	1	1	4	2	4	2	1	2	2	1	3	3	2	2	3	2	1
29	4	1	1	4	3	2	3	4	1	2	2	1	2	2	3	3	1	1	1	2	4	1	3	4	4	1	4	3	2	2	1	1	3	1	4	1	4	1	1	4	1	1	3	3	1	2	3	4	3
30	4	3	3	4	3	1	3	2	1	1	2	1	2	4	3	1	1	1	1	2	4	1	3	4	4	1	4	3	2	1	3	1	3	1	4	2	4	2	1	4	1	1	3	3	1	2	3	4	1
31	2	3	3	4	3	1	1	4	2	2	2	3	2	2	1	1	2	3	1	4	4	1	3	4	4	1	4	3	4	1	1	1	3	1	4	2	4	1	1	2	2	2	1	3	2	2	3	2	1
32	4	1	1	4	3	1	3	2	1	1	2	3	1	4	1	1	2	1	1	2	4	1	1	4	4	1	4	3	2	1	3	1	1	1	4	2	2	1	1	4	1	1	3	3	1	2	3	2	3
33	4	3	3	4	3	2	3	4	2	2	4	1	1	4	3	3	1	1	1	2	4	1	3	4	4	2	4	1	2	2	3	2	3	1	4	1	2	1	1	4	2	1	3	3	2	2	3	4	1
34	2	1	1	4	3	1	3	4	2	2	4	3	2	4	1	1	2	3	1	2	4	1	3	4	4	1	4	1	2	2	3	1	3	1	4	2	4	2	1	2	2	1	3	1	2	2	3	4	3
35	4	1	1	4	3	1	3	4	1	1	2	3	1	4	1	3	2	1	1	2	4	1	1	4	4	1	4	1	2	1	3	2	1	1	2	1	2	1	1	4	1	1	3	1	1	2	3	4	1
36	2	3	3	2	3	1	3	4	1	1	2	3	2	4	1	3	1	1	1	2	4	1	1	4	4	1	2	3	2	2	3	1	1	1	4	1	2	2	1	2	1	1	3	1	1	2	3	4	3
37	2	3	3	2	3	1	3	4	1	2	2	1	2	4	1	1	1	1	1	2	4	3	1	4	4	2	2	3	2	2	3	1	1	1	4	2	4	2	3	2	1	1	3	3	1	2	3	2	1
38	4	3	3	4	3	1	1	4	1	2	4	1	1	2	1	1	2	3	1	2	4	1	1	4	4	2	4	1	2	2	3	1	1	1	4	1	4	1	3	4	2	1	3	3	2	1	3	4	1
39	4	1	1	4	3	1	1	4	1	1	4	3	1	2	1	3	2	3	1	2	4	3	3	4	4	1	4	1	2	2	3	2	3	1	4	2	4	1	1	4	1	1	3	1	1	2	3	4	3
40	4	3	3	4	3	2	3	4	2	2	4	3	2	4	1	1	1	3	1	4	4	1	3	4	4	2	4	1	4	2	3	2	3	1	2	2	4	1	1	4	1	1	1	3	1	2	3	4	3
41	2	1	1	4	3	1	3	2	2	2	4	3	2	4	3	3	2	1	1	2	4	1	3	4	4	1	4	3	2	1	3	1	1	1	4	2	2	1	1	2	2	1	3	1	2	1	3	2	3
42	4	1	1	4	3	1	3	4	1	2	4	1	1	4	3	3	1	1	1	2	4	1	3	4	4	1	4	1	2	1	3	2	3	1	4	1	2	1	1	4	2	1	3	3	2	2	3	4	1
43	4	1	1	4	3	1	3	4	1	2	2	3	1	4	1	3	2	1	1	2	4	3	1	4	4	1	4	3	2	2	3	2	1	1	4	2	4	1	1	4	2	1	3	3	2	2	3	4	3
44	4	3	3	4	3	2	3	2	2	2	2	3	1	4	1	3	2	1	1	2	4	3	3	4	4	1	2	3	2	2	3	1	1	1	4	1	2	1	3	4	2	1	3	3	2	2	3	2	3
45	4	1	1	4	3	2	3	4	2	2	2	3	2	4	3	3	1	3	1	4	4	1	3	4	4	1	2	1	4	2	3	1	3	1	4	2	2	1	3	2	1	1	3	3	1	2	3	4	1
46	2	1	3	4	3	2	1	4	2	2	4	1	2	4	1	1	2	1	1	2	4	3	1	4	4	1	4	3	2	2	3	2	1	1	2	2	4	1	1	2	1	1	3	3	1	1	3	2	3
47	4	3	3	4	1	1	1	2	1	1	2	3	1	4	1	1	2	1	1	2	4	3	1	4	4	1	2	1	2	1	3	2	1	1	4	1	2	1	1	4	1	2	3	1	1	1	1	4	1
48	4	3	3	4	1	2	3	2	2	2	4	1	2	4	3	3	2	3	2	2	4	3	3	4	4	2	4	3	2	2	3	1	3	2	2	2	2	1	3	2	2	1	3	3	2	2	1	2	3
49	4	1	1	4	3	2	3	2	2	2	4	3	2	2	1	1	1	3	2	2	4	3	1	4	4	1	4	1	2	1	1	1	3	2	4	2	2	2	1	2	2	1	3	3	2	2	3	4	1
50	4	3	3	4	3	1	3	2	1	2	2	3	2	4	3	3	1	1	1	2	4	3	3	4	4	1	2	3	2	1	3	1	1	1	4	2	2	1	3	2	1	1	3	3	1	2	3	2	1
51	2	1	1	4	3	1	1	2	1	1	2	1	2	4	3	3	2	1	2	2	4	3	1	4	4	1	2	3	2	2	3	1	3	2	4	2	2	1	3	2	1	1	3	3	1	1	1	2	3
52	4	3	3	4	1	1	3	4	2	2	4	1	1	4	1	1	2	3	2	4	2	3	3	4	4	2	4	3	4	1	1	1	3	2	4	1	2	1	1	4	2	1	3	3	2	2	3	4	3
53	2	1	1	4	3	2	3	4	2	1	2	3	2	2	3	1	2	1	1	2	4	3	1	4	4	2	4	3	2	1	3	1	3	1	4	2	2	1	1	2	2	2	3	3	2	2	3	2	3
54	2	1	1	4	3	1	3	2	2	2	2	1	1	4	3	1	2	1	1	2	4	3	3	4	4	2	4	1	2	2	1	1	3	1	2	2	2	1	3	2	1	1	3	3	1	1	3	4	1
55	4	1	1	2	3	1	1	4	2	1	2	3	2	4	3	3	1	1	2	2	4	3	3	4	4	2	4	1	2	1	3	1	3	2	4	1	2	1	1	2	2	1	3	3	2	2	3	4	1
56	4	1	1	2	3	2	3	4	2	2	4	1	2	4	1	1	1	3	1	2	4	3	3	4	4	2	4	1	2	2	3	1	3	1	4	2	4	1	1	2	2	1	3	3	2	1	1	2	1
57	4	3	1	4	3	1	1	4	1	1	2	3	2	4	3	1	2	1	2	2	4	3	3	4	4	2	4	3	2	2	1	1	3	2	2	1	4	1	3	2	2	1	3	3	2	2	3	4	1
58	2	1	1	4	3	2	1	4	2	2	2	3	2	2	1	3	1	1	1	2	4	3	3	4	2	2	2	1	2	1	3	1	1	1	2	2	2	1	1	2	2	1	3	3	2	2	3	2	1
59	2	1	1	4	1	1	1	4	2	1	2	3	2	2	3	3	2	3	2	2	4	3	3	4	2	2	2	3	4	1	1	1	1	2	2	2	4	1	1	2	2	2	1	3	2	1	3	2	3
60	4	1	3	4	3	2	3	2	2	2	2	3	1	4	3	3	1	1	1	2	4	3	3	4	4	2	2	3	2	1	3	2	3	1	2	1	2	2	3	4	2	1	3	3	2	1	3	2	1
61	4	3	1	2	3	1	3	2	1	1	2	1	2	4	1	3	2	1	1	2	4	3	1	4	4	2	2	3	2	2	3	1	1	1	2	2	4	1	1	2	2	1	3	3	2	2	3	2	1
62	2	1	1	4	3	2	3	2	2	2	2	3	2	4	3	3	2	1	1	2	4	3	3	4	2	2	2	1	2	2	3	1	3	1	4	2	2	1	3	2	2	1	3	3	2	2	3	2	1
63	2	1	1	4	3	2	3	2	2	1	2	3	2	4	3	3	2	1	1	4	4	1	3	4	4	2	2	3	2	2	3	1	3	1	4	2	2	1	3	2	2	1	3	3	2	2	3	2	1
64	2	1	1	4	3	2	3	2	2	1	4	3	2	2	3	3	2	1	2	4	4	3	3	4	4	2	4	3	2	2	3	1	1	2	4	2	4	1	3	2	2	2	3	3	2	2	3	4	3
65	4	1	3	4	3	2	3	2	2	2	2	3	1	4	3	3	1	1	2	2	4	1	3	4	2	2	2	3	4	1	3	1	3	2	2	2	2	1	1	2	2	2	3	3	2	2	3	2	3
66	4	3	3	4	1	1	1	4	2	1	2	1	1	4	1	3	1	3	2	2	4	1	1	4	2	2	2	1	2	1	1	1	3	2	2	2	4	1	3	2	2	1	1	3	1	2	3	2	3
67	4	1	1	2	3	1	3	4	1	1	2	3	1	4	3	3	1	1	1	2	4	3	3	4	4	2	2	3	2	2	3	1	3	1	2	1	2	1	1	4	1	2	3	3	1	2	3	4	3
68	4	3	3	4	3	2	3	2	2	1	2	3	1	4	3	3	2	1	1	2	4	3	3	4	2	2	4	1	2	2	1	2	3	1	2	2	2	1	1	2	2	1	3	3	2	1	3	2	3
69	4	1	3	2	3	2	1	4	2	1	2	3	1	4	3	3	2	3	1	4	2	3	3	4	2	2	4	3	2	2	3	2	1	1	2	1	4	1	3	4	2	1	3	3	2	2	1	2	1
70	4	1	3	2	3	1	3	4	2	2	2	3	2	2	3	1	2	3	2	2	4	3	3	4	2	2	2	1	2	1	3	2	3	2	2	2	2	1	1	2	2	1	3	3	2	1	3	2	1
71	4	3	3	2	3	2	1	4	2	1	2	3	2	2	3	1	1	3	2	2	4	1	3	4	4	2	2	1	2	2	1	1	3	2	4	2	2	1	3	2	2	1	1	3	2	1	3	2	1
72	4	1	3	2	1	2	1	4	2	2	4	3	1	2	3	1	1	3	2	4	4	3	3	4	4	2	2	1	4	2	1	1	1	2	2	2	2	1	3	2	2	1	1	3	2	2	3	2	1
73	4	3	3	2	3	2	3	4	2	1	2	3	2	2	3	3	1	3	2	4	2	3	3	2	4	2	2	3	4	2	3	1	1	2	4	2	2	1	3	2	2	1	3	3	2	2	1	2	1
74	2	1	3	4	3	2	3	4	2	2	2	3	2	4	1	3	2	3	2	2	4	3	3	2	2	2	2	1	2	1	3	2	3	2	2	2	4	2	3	2	2	1	3	3	2	1	1	2	3
75	4	1	1	4	3	2	3	4	2	2	2	1	1	2	3	1	2	3	1	4	4	3	3	2	2	2	2	1	2	2	1	2	3	1	4	2	4	2	3	2	2	1	1	3	2	2	3	2	1
76	2	3	3	4	3	2	1	4	2	2	2	3	2	4	3	1	2	1	1	2	2	3	3	4	4	2	2	3	4	1	3	2	3	1	2	1	2	2	3	2	2	1	3	1	2	2	3	2	1
77	4	1	3	2	3	2	3	2	2	2	2	3	2	2	3	3	2	1	2	2	4	3	3	4	4	2	2	3	4	2	1	2	3	2	2	1	2	2	3	2	2	1	3	1	2	2	3	2	1
78	4	3	3	4	3	2	1	4	2	2	2	1	2	4	3	3	2	3	2	2	4	1	3	4	2	2	2	1	2	2	1	2	3	2	2	1	2	1	1	2	2	1	1	1	2	2	3	2	1
79	4	3	1	2	1	2	3	4	2	1	4	3	2	2	3	3	1	1	1	2	2	3	3	2	2	2	2	3	4	2	1	1	3	1	4	1	4	1	1	2	2	1	3	1	2	2	3	2	1
80	4	1	1	2	3	2	3	4	2	2	2	1	1	2	3	3	2	1	2	2	4	3	1	4	2	2	4	3	4	2	3	2	1	2	4	1	4	1	1	4	2	2	3	1	2	2	3	4	3
81	4	3	3	4	3	2	1	2	2	2	2	1	2	2	1	1	1	1	2	4	4	3	3	4	4	2	4	3	4	2	1	2	3	2	4	1	4	2	3	2	2	1	3	1	2	2	1	4	3
82	2	1	3	4	3	2	3	4	2	2	2	1	2	4	3	3	2	3	2	2	4	1	1	4	4	2	4	3	2	2	1	2	3	2	4	1	4	1	1	2	2	2	3	1	2	2	3	4	1
83	4	1	1	2	1	2	3	4	2	1	4	1	1	2	1	1	1	3	2	2	4	1	1	4	4	2	4	1	4	2	1	1	1	2	4	1	2	1	1	2	2	1	3	1	2	1	3	4	1
84	4	3	1	4	3	2	3	2	2	2	2	1	1	2	1	1	1	1	2	4	4	1	1	4	2	2	4	1	4	2	3	2	1	2	4	1	4	2	1	4	2	1	1	1	2	2	1	4	3
85	4	3	3	4	1	2	3	2	2	1	2	1	2	4	1	3	2	1	2	4	4	3	3	4	4	2	4	3	2	2	1	2	3	2	4	1	2	2	1	2	2	1	3	1	2	2	1	4	3
86	4	3	3	4	3	1	3	2	1	2	2	1	2	4	3	1	2	3	1	4	4	3	1	4	2	2	4	3	4	2	3	2	3	1	4	1	2	1	1	2	2	2	3	1	2	2	3	2	3
87	2	3	3	4	3	2	1	4	2	2	2	1	2	4	1	3	1	1	2	2	4	3	1	4	2	2	4	3	2	2	1	2	3	2	2	1	4	1	1	2	2	1	3	1	1	2	3	2	1
88	2	3	3	4	3	2	3	4	2	2	2	1	2	2	3	3	2	3	2	2	4	1	1	4	4	2	4	3	2	2	3	2	3	2	4	1	2	2	1	2	2	1	3	1	2	2	3	4	1
89	4	3	1	4	3	2	3	4	2	1	2	1	1	2	3	3	2	3	2	2	2	1	1	4	2	2	4	1	2	2	3	2	1	2	4	1	4	1	1	4	2	1	1	1	2	2	3	4	1
90	4	1	3	4	3	2	3	4	2	1	4	1	2	2	3	3	1	1	2	4	2	1	3	4	4	2	4	3	2	2	3	1	3	2	4	1	2	1	1	2	2	1	3	1	2	2	3	4	3
91	4	3	3	4	1	2	3	2	2	1	2	3	1	4	1	1	2	1	2	2	4	3	1	4	4	2	4	1	4	2	3	1	1	2	4	1	2	1	1	4	2	1	3	1	2	1	3	4	3
92	2	1	1	4	3	2	3	4	2	1	2	1	2	4	1	1	1	1	2	2	2	3	1	4	4	2	4	3	2	2	3	1	3	2	4	1	2	1	1	2	2	1	3	1	2	2	3	4	3
93	4	3	3	2	3	2	3	2	2	2	2	1	1	4	1	1	2	1	2	2	4	3	3	4	4	2	2	3	4	2	3	2	1	2	4	2	2	1	1	4	2	1	1	3	2	2	3	4	3
94	4	3	3	2	3	2	3	4	2	1	2	1	2	4	1	1	2	1	2	2	4	1	3	4	4	2	2	1	2	2	3	2	3	2	4	1	4	1	3	4	2	1	1	3	2	2	3	4	3
95	4	1	3	2	1	2	1	4	2	2	4	1	1	4	1	1	2	1	2	2	2	1	3	4	2	2	2	3	2	2	3	2	3	2	4	2	2	1	1	4	2	2	3	3	2	2	3	4	1
96	4	3	3	2	1	2	3	4	2	2	4	1	1	2	3	3	1	3	2	2	4	1	3	2	4	2	2	3	2	2	1	2	1	2	4	1	2	2	3	4	2	1	1	3	2	2	3	4	3
97	4	1	3	4	4	1	3	2	1	2	4	1	2	2	3	3	1	1	1	2	4	3	1	4	4	1	4	1	4	1	1	2	1	1	2	2	4	2	1	4	1	2	1	1	1	2	3	4	3
98	2	1	3	4	2	1	3	2	1	2	2	3	2	4	1	3	2	1	1	2	2	1	1	4	4	1	4	1	2	1	1	2	1	1	2	2	4	1	1	2	1	1	3	1	1	1	1	4	1
99	2	3	1	4	4	2	3	4	2	2	2	1	1	2	1	3	2	3	2	4	2	1	3	4	4	2	4	1	2	2	1	2	1	2	4	2	4	1	1	2	2	1	3	3	2	1	3	4	1
100	2	3	3	4	4	2	1	2	2	2	2	3	1	2	3	3	1	1	2	2	2	1	3	4	2	2	4	1	4	2	3	2	1	2	4	1	4	2	3	4	2	1	1	3	2	2	3	4	1
101	2	3	3	4	2	2	1	2	2	2	4	1	2	2	3	1	1	3	2	4	4	1	3	4	4	2	4	3	2	2	3	1	3	1	4	2	4	1	3	4	2	2	1	3	2	2	3	4	1
102	2	3	3	4	2	1	3	2	1	2	4	3	2	4	3	1	1	1	1	2	4	1	3	2	2	1	4	1	4	1	1	2	3	1	4	2	4	1	1	4	1	2	3	3	1	2	3	4	1
103	2	3	1	4	2	1	1	2	1	2	4	1	2	2	1	1	1	3	1	4	4	1	1	2	2	1	4	3	4	1	1	2	3	1	2	2	4	2	3	4	1	1	3	3	1	1	1	4	1
1	4	3	3	2	3	1	3	4	1	2	4	3	1	4	1	1	1	3	1	2	4	3	1	4	4	1	2	1	4	2	3	1	3	1	2	2	2	1	1	4	2	1	1	3	1	2	3	4	1
2	4	1	1	4	3	2	1	4	2	2	2	1	1	4	1	1	2	1	1	2	4	3	1	4	4	1	2	3	2	1	1	1	3	1	2	2	2	2	1	4	1	1	3	3	1	2	3	2	1
3	4	3	3	4	1	1	1	4	1	2	4	1	2	4	1	3	1	3	1	4	4	1	1	4	4	1	4	3	2	1	3	1	1	1	2	1	2	1	1	4	2	1	1	3	1	2	3	2	1
4	4	1	1	2	3	1	3	2	1	1	4	1	1	4	1	1	1	3	1	2	4	3	1	4	4	1	4	1	2	2	1	1	3	1	2	2	2	1	3	4	1	1	3	1	1	2	1	2	3
5	2	1	3	2	1	2	3	4	2	1	2	1	2	4	3	1	1	1	1	2	4	3	3	4	4	1	2	3	4	1	1	1	3	1	2	1	2	1	3	2	1	1	3	1	1	2	3	2	3
6	2	3	1	2	3	1	1	4	2	2	4	1	2	2	1	3	2	1	1	4	4	3	3	4	4	1	2	3	2	2	3	1	3	1	4	1	2	2	3	2	1	2	3	3	2	2	3	2	1
7	2	1	1	2	3	1	1	4	2	1	2	1	1	2	1	1	2	1	1	4	2	3	3	2	4	1	2	1	4	1	3	1	1	1	2	2	4	2	1	2	1	2	3	1	1	1	1	2	3
8	2	3	3	2	3	1	1	2	1	2	2	1	2	4	1	1	1	1	1	2	2	3	3	4	4	1	4	3	2	1	3	1	1	1	4	1	2	1	3	2	1	1	3	3	2	2	3	2	1
9	2	1	1	2	3	2	3	4	2	2	2	1	2	2	1	3	1	1	1	2	2	3	3	4	4	1	2	1	2	2	3	1	3	1	2	1	2	2	1	4	1	1	3	1	1	1	3	4	3
10	2	3	1	2	1	1	1	4	1	1	4	1	1	2	1	3	2	3	1	2	4	3	1	4	4	1	2	1	2	2	3	1	3	1	2	1	4	1	1	4	1	1	3	1	1	1	3	4	1
11	2	3	3	2	1	2	3	4	2	2	4	3	1	2	1	3	2	3	1	4	4	1	1	4	4	1	4	1	2	2	1	1	1	1	4	2	2	1	1	4	2	1	3	3	2	2	3	4	3
12	2	3	3	2	3	2	1	4	2	2	2	1	2	2	1	3	2	1	1	4	4	1	1	4	4	1	2	1	2	2	3	1	1	1	4	1	2	1	3	2	1	1	3	3	2	2	3	2	3
13	4	3	3	2	3	2	3	4	1	1	4	3	2	4	1	3	2	3	1	2	4	3	1	4	4	1	2	3	4	2	3	1	3	1	4	2	2	1	1	4	1	1	3	3	2	2	3	4	3
14	4	1	3	2	3	1	3	2	1	2	2	1	2	4	3	1	1	1	1	2	4	1	3	4	4	1	4	1	4	1	3	1	3	1	4	1	2	1	3	4	2	1	3	3	2	2	1	2	1
15	4	3	3	2	1	1	3	4	2	2	2	1	1	4	3	1	2	1	1	2	4	3	3	4	2	1	2	3	4	1	1	1	3	1	2	2	2	1	3	2	1	1	3	1	1	1	3	2	1
16	2	3	1	2	3	1	1	4	1	1	2	1	2	4	1	1	1	3	1	2	4	3	1	4	4	1	4	3	4	1	3	1	3	1	2	1	2	1	1	2	1	2	1	3	1	2	3	2	1
17	4	3	3	2	1	2	1	4	1	2	2	1	2	4	1	3	2	3	1	2	4	1	3	4	4	1	2	1	2	1	3	2	3	1	2	1	2	2	1	4	1	1	1	3	1	1	3	2	1
18	4	3	3	2	3	2	1	2	2	2	2	3	2	4	1	3	2	1	1	4	4	3	3	4	4	1	2	3	2	1	3	2	3	1	2	1	4	1	3	4	1	1	3	1	1	2	3	2	1
19	2	3	3	2	3	1	1	4	1	1	2	1	2	4	3	1	1	3	1	2	2	3	3	4	4	1	2	1	4	1	3	1	3	1	4	2	2	1	3	2	2	1	3	1	2	2	3	2	1
20	4	1	1	2	3	2	3	4	2	1	2	1	2	4	3	3	1	1	1	2	4	3	3	4	4	1	4	3	2	2	3	2	3	1	2	2	4	1	3	4	1	2	3	3	1	2	3	4	1
21	4	3	1	4	3	2	1	4	2	1	4	1	1	4	3	1	2	3	1	2	4	3	3	4	4	1	4	3	2	1	3	2	3	1	2	1	4	1	3	4	2	1	1	3	1	2	3	2	1
22	4	3	1	2	3	1	3	4	1	2	4	1	1	2	3	1	1	3	1	4	4	3	3	4	4	2	2	3	4	2	3	1	3	1	2	1	4	1	3	4	1	1	1	3	1	1	3	4	1
23	4	1	1	2	3	1	1	4	1	1	2	1	1	4	3	1	2	1	1	2	4	3	3	4	4	1	4	1	2	1	3	1	3	1	2	1	4	2	3	4	1	1	1	1	1	1	1	2	1
24	4	3	3	2	3	1	1	2	1	1	4	3	1	4	1	1	2	3	1	4	2	3	1	4	2	1	2	3	4	1	3	1	1	1	2	2	4	1	1	4	1	1	1	1	1	1	3	2	1
25	4	3	3	2	3	1	3	4	1	2	2	1	2	4	3	3	1	1	1	2	4	3	3	4	4	1	4	1	4	2	3	1	3	1	4	2	4	1	3	4	1	1	3	3	1	2	3	2	1
26	4	1	1	2	3	2	1	4	1	1	4	3	2	4	3	3	1	3	1	2	4	1	3	4	4	1	4	1	2	2	1	2	3	1	4	1	2	1	3	4	1	1	3	3	2	2	1	2	1
27	4	3	1	4	3	2	3	4	2	2	4	3	1	4	1	3	2	1	2	2	4	1	1	4	2	1	4	1	2	2	3	1	1	2	4	2	4	1	1	2	2	1	3	3	2	2	1	4	1
28	4	3	3	4	3	1	3	4	2	1	2	3	1	4	1	3	2	1	1	4	4	1	1	4	4	1	4	3	2	2	3	2	1	1	4	2	4	2	1	2	2	1	3	3	2	2	3	2	1
29	4	1	1	4	3	2	3	4	1	2	2	1	2	2	3	3	1	1	1	2	4	1	3	4	4	1	4	3	2	2	1	1	3	1	4	1	4	1	1	4	1	1	3	3	1	2	3	4	3
30	4	3	3	4	3	1	3	2	1	1	2	1	2	4	3	1	1	1	1	2	4	1	3	4	4	1	4	3	2	1	3	1	3	1	4	2	4	2	1	4	1	1	3	3	1	2	3	4	1
31	2	3	3	4	3	1	1	4	2	2	2	3	2	2	1	1	2	3	1	4	4	1	3	4	4	1	4	3	4	1	1	1	3	1	4	2	4	1	1	2	2	2	1	3	2	2	3	2	1
32	4	1	1	4	3	1	3	2	1	1	2	3	1	4	1	1	2	1	1	2	4	1	1	4	4	1	4	3	2	1	3	1	1	1	4	2	2	1	1	4	1	1	3	3	1	2	3	2	3
33	4	3	3	4	3	2	3	4	2	2	4	1	1	4	3	3	1	1	1	2	4	1	3	4	4	2	4	1	2	2	3	2	3	1	4	1	2	1	1	4	2	1	3	3	2	2	3	4	1
34	2	1	1	4	3	1	3	4	2	2	4	3	2	4	1	1	2	3	1	2	4	1	3	4	4	1	4	1	2	2	3	1	3	1	4	2	4	2	1	2	2	1	3	1	2	2	3	4	3
35	4	1	1	4	3	1	3	4	1	1	2	3	1	4	1	3	2	1	1	2	4	1	1	4	4	1	4	1	2	1	3	2	1	1	2	1	2	1	1	4	1	1	3	1	1	2	3	4	1
36	2	3	3	2	3	1	3	4	1	1	2	3	2	4	1	3	1	1	1	2	4	1	1	4	4	1	2	3	2	2	3	1	1	1	4	1	2	2	1	2	1	1	3	1	1	2	3	4	3
37	2	3	3	2	3	1	3	4	1	2	2	1	2	4	1	1	1	1	1	2	4	3	1	4	4	2	2	3	2	2	3	1	1	1	4	2	4	2	3	2	1	1	3	3	1	2	3	2	1
38	4	3	3	4	3	1	1	4	1	2	4	1	1	2	1	1	2	3	1	2	4	1	1	4	4	2	4	1	2	2	3	1	1	1	4	1	4	1	3	4	2	1	3	3	2	1	3	4	1
39	4	1	1	4	3	1	1	4	1	1	4	3	1	2	1	3	2	3	1	2	4	3	3	4	4	1	4	1	2	2	3	2	3	1	4	2	4	1	1	4	1	1	3	1	1	2	3	4	3
40	4	3	3	4	3	2	3	4	2	2	4	3	2	4	1	1	1	3	1	4	4	1	3	4	4	2	4	1	4	2	3	2	3	1	2	2	4	1	1	4	1	1	1	3	1	2	3	4	3
41	2	1	1	4	3	1	3	2	2	2	4	3	2	4	3	3	2	1	1	2	4	1	3	4	4	1	4	3	2	1	3	1	1	1	4	2	2	1	1	2	2	1	3	1	2	1	3	2	3
42	4	1	1	4	3	1	3	4	1	2	4	1	1	4	3	3	1	1	1	2	4	1	3	4	4	1	4	1	2	1	3	2	3	1	4	1	2	1	1	4	2	1	3	3	2	2	3	4	1
43	4	1	1	4	3	1	3	4	1	2	2	3	1	4	1	3	2	1	1	2	4	3	1	4	4	1	4	3	2	2	3	2	1	1	4	2	4	1	1	4	2	1	3	3	2	2	3	4	3
44	4	3	3	4	3	2	3	2	2	2	2	3	1	4	1	3	2	1	1	2	4	3	3	4	4	1	2	3	2	2	3	1	1	1	4	1	2	1	3	4	2	1	3	3	2	2	3	2	3
45	4	1	1	4	3	2	3	4	2	2	2	3	2	4	3	3	1	3	1	4	4	1	3	4	4	1	2	1	4	2	3	1	3	1	4	2	2	1	3	2	1	1	3	3	1	2	3	4	1
46	2	1	3	4	3	2	1	4	2	2	4	1	2	4	1	1	2	1	1	2	4	3	1	4	4	1	4	3	2	2	3	2	1	1	2	2	4	1	1	2	1	1	3	3	1	1	3	2	3
47	4	3	3	4	1	1	1	2	1	1	2	3	1	4	1	1	2	1	1	2	4	3	1	4	4	1	2	1	2	1	3	2	1	1	4	1	2	1	1	4	1	2	3	1	1	1	1	4	1
48	4	3	3	4	1	2	3	2	2	2	4	1	2	4	3	3	2	3	2	2	4	3	3	4	4	2	4	3	2	2	3	1	3	2	2	2	2	1	3	2	2	1	3	3	2	2	1	2	3
49	4	1	1	4	3	2	3	2	2	2	4	3	2	2	1	1	1	3	2	2	4	3	1	4	4	1	4	1	2	1	1	1	3	2	4	2	2	2	1	2	2	1	3	3	2	2	3	4	1
50	4	3	3	4	3	1	3	2	1	2	2	3	2	4	3	3	1	1	1	2	4	3	3	4	4	1	2	3	2	1	3	1	1	1	4	2	2	1	3	2	1	1	3	3	1	2	3	2	1
51	2	1	1	4	3	1	1	2	1	1	2	1	2	4	3	3	2	1	2	2	4	3	1	4	4	1	2	3	2	2	3	1	3	2	4	2	2	1	3	2	1	1	3	3	1	1	1	2	3
52	4	3	3	4	1	1	3	4	2	2	4	1	1	4	1	1	2	3	2	4	2	3	3	4	4	2	4	3	4	1	1	1	3	2	4	1	2	1	1	4	2	1	3	3	2	2	3	4	3
53	2	1	1	4	3	2	3	4	2	1	2	3	2	2	3	1	2	1	1	2	4	3	1	4	4	2	4	3	2	1	3	1	3	1	4	2	2	1	1	2	2	2	3	3	2	2	3	2	3
54	2	1	1	4	3	1	3	2	2	2	2	1	1	4	3	1	2	1	1	2	4	3	3	4	4	2	4	1	2	2	1	1	3	1	2	2	2	1	3	2	1	1	3	3	1	1	3	4	1
55	4	1	1	2	3	1	1	4	2	1	2	3	2	4	3	3	1	1	2	2	4	3	3	4	4	2	4	1	2	1	3	1	3	2	4	1	2	1	1	2	2	1	3	3	2	2	3	4	1
56	4	1	1	2	3	2	3	4	2	2	4	1	2	4	1	1	1	3	1	2	4	3	3	4	4	2	4	1	2	2	3	1	3	1	4	2	4	1	1	2	2	1	3	3	2	1	1	2	1
57	4	3	1	4	3	1	1	4	1	1	2	3	2	4	3	1	2	1	2	2	4	3	3	4	4	2	4	3	2	2	1	1	3	2	2	1	4	1	3	2	2	1	3	3	2	2	3	4	1
58	2	1	1	4	3	2	1	4	2	2	2	3	2	2	1	3	1	1	1	2	4	3	3	4	2	2	2	1	2	1	3	1	1	1	2	2	2	1	1	2	2	1	3	3	2	2	3	2	1
59	2	1	1	4	1	1	1	4	2	1	2	3	2	2	3	3	2	3	2	2	4	3	3	4	2	2	2	3	4	1	1	1	1	2	2	2	4	1	1	2	2	2	1	3	2	1	3	2	3
60	4	1	3	4	3	2	3	2	2	2	2	3	1	4	3	3	1	1	1	2	4	3	3	4	4	2	2	3	2	1	3	2	3	1	2	1	2	2	3	4	2	1	3	3	2	1	3	2	1
61	4	3	1	2	3	1	3	2	1	1	2	1	2	4	1	3	2	1	1	2	4	3	1	4	4	2	2	3	2	2	3	1	1	1	2	2	4	1	1	2	2	1	3	3	2	2	3	2	1
62	2	1	1	4	3	2	3	2	2	2	2	3	2	4	3	3	2	1	1	2	4	3	3	4	2	2	2	1	2	2	3	1	3	1	4	2	2	1	3	2	2	1	3	3	2	2	3	2	1
63	2	1	1	4	3	2	3	2	2	1	2	3	2	4	3	3	2	1	1	4	4	1	3	4	4	2	2	3	2	2	3	1	3	1	4	2	2	1	3	2	2	1	3	3	2	2	3	2	1
64	2	1	1	4	3	2	3	2	2	1	4	3	2	2	3	3	2	1	2	4	4	3	3	4	4	2	4	3	2	2	3	1	1	2	4	2	4	1	3	2	2	2	3	3	2	2	3	4	3
65	4	1	3	4	3	2	3	2	2	2	2	3	1	4	3	3	1	1	2	2	4	1	3	4	2	2	2	3	4	1	3	1	3	2	2	2	2	1	1	2	2	2	3	3	2	2	3	2	3
66	4	3	3	4	1	1	1	4	2	1	2	1	1	4	1	3	1	3	2	2	4	1	1	4	2	2	2	1	2	1	1	1	3	2	2	2	4	1	3	2	2	1	1	3	1	2	3	2	3
67	4	1	1	2	3	1	3	4	1	1	2	3	1	4	3	3	1	1	1	2	4	3	3	4	4	2	2	3	2	2	3	1	3	1	2	1	2	1	1	4	1	2	3	3	1	2	3	4	3
68	4	3	3	4	3	2	3	2	2	1	2	3	1	4	3	3	2	1	1	2	4	3	3	4	2	2	4	1	2	2	1	2	3	1	2	2	2	1	1	2	2	1	3	3	2	1	3	2	3
69	4	1	3	2	3	2	1	4	2	1	2	3	1	4	3	3	2	3	1	4	2	3	3	4	2	2	4	3	2	2	3	2	1	1	2	1	4	1	3	4	2	1	3	3	2	2	1	2	1
70	4	1	3	2	3	1	3	4	2	2	2	3	2	2	3	1	2	3	2	2	4	3	3	4	2	2	2	1	2	1	3	2	3	2	2	2	2	1	1	2	2	1	3	3	2	1	3	2	1
71	4	3	3	2	3	2	1	4	2	1	2	3	2	2	3	1	1	3	2	2	4	1	3	4	4	2	2	1	2	2	1	1	3	2	4	2	2	1	3	2	2	1	1	3	2	1	3	2	1
72	4	1	3	2	1	2	1	4	2	2	4	3	1	2	3	1	1	3	2	4	4	3	3	4	4	2	2	1	4	2	1	1	1	2	2	2	2	1	3	2	2	1	1	3	2	2	3	2	1
73	4	3	3	2	3	2	3	4	2	1	2	3	2	2	3	3	1	3	2	4	2	3	3	2	4	2	2	3	4	2	3	1	1	2	4	2	2	1	3	2	2	1	3	3	2	2	1	2	1
74	2	1	3	4	3	2	3	4	2	2	2	3	2	4	1	3	2	3	2	2	4	3	3	2	2	2	2	1	2	1	3	2	3	2	2	2	4	2	3	2	2	1	3	3	2	1	1	2	3
75	4	1	1	4	3	2	3	4	2	2	2	1	1	2	3	1	2	3	1	4	4	3	3	2	2	2	2	1	2	2	1	2	3	1	4	2	4	2	3	2	2	1	1	3	2	2	3	2	1
76	2	3	3	4	3	2	1	4	2	2	2	3	2	4	3	1	2	1	1	2	2	3	3	4	4	2	2	3	4	1	3	2	3	1	2	1	2	2	3	2	2	1	3	1	2	2	3	2	1
77	4	1	3	2	3	2	3	2	2	2	2	3	2	2	3	3	2	1	2	2	4	3	3	4	4	2	2	3	4	2	1	2	3	2	2	1	2	2	3	2	2	1	3	1	2	2	3	2	1
78	4	3	3	4	3	2	1	4	2	2	2	1	2	4	3	3	2	3	2	2	4	1	3	4	2	2	2	1	2	2	1	2	3	2	2	1	2	1	1	2	2	1	1	1	2	2	3	2	1
79	4	3	1	2	1	2	3	4	2	1	4	3	2	2	3	3	1	1	1	2	2	3	3	2	2	2	2	3	4	2	1	1	3	1	4	1	4	1	1	2	2	1	3	1	2	2	3	2	1
80	4	1	1	2	3	2	3	4	2	2	2	1	1	2	3	3	2	1	2	2	4	3	1	4	2	2	4	3	4	2	3	2	1	2	4	1	4	1	1	4	2	2	3	1	2	2	3	4	3
81	4	3	3	4	3	2	1	2	2	2	2	1	2	2	1	1	1	1	2	4	4	3	3	4	4	2	4	3	4	2	1	2	3	2	4	1	4	2	3	2	2	1	3	1	2	2	1	4	3
82	2	1	3	4	3	2	3	4	2	2	2	1	2	4	3	3	2	3	2	2	4	1	1	4	4	2	4	3	2	2	1	2	3	2	4	1	4	1	1	2	2	2	3	1	2	2	3	4	1
83	4	1	1	2	1	2	3	4	2	1	4	1	1	2	1	1	1	3	2	2	4	1	1	4	4	2	4	1	4	2	1	1	1	2	4	1	2	1	1	2	2	1	3	1	2	1	3	4	1
84	4	3	1	4	3	2	3	2	2	2	2	1	1	2	1	1	1	1	2	4	4	1	1	4	2	2	4	1	4	2	3	2	1	2	4	1	4	2	1	4	2	1	1	1	2	2	1	4	3
85	4	3	3	4	1	2	3	2	2	1	2	1	2	4	1	3	2	1	2	4	4	3	3	4	4	2	4	3	2	2	1	2	3	2	4	1	2	2	1	2	2	1	3	1	2	2	1	4	3
86	4	3	3	4	3	1	3	2	1	2	2	1	2	4	3	1	2	3	1	4	4	3	1	4	2	2	4	3	4	2	3	2	3	1	4	1	2	1	1	2	2	2	3	1	2	2	3	2	3
87	2	3	3	4	3	2	1	4	2	2	2	1	2	4	1	3	1	1	2	2	4	3	1	4	2	2	4	3	2	2	1	2	3	2	2	1	4	1	1	2	2	1	3	1	1	2	3	2	1
88	2	3	3	4	3	2	3	4	2	2	2	1	2	2	3	3	2	3	2	2	4	1	1	4	4	2	4	3	2	2	3	2	3	2	4	1	2	2	1	2	2	1	3	1	2	2	3	4	1
89	4	3	1	4	3	2	3	4	2	1	2	1	1	2	3	3	2	3	2	2	2	1	1	4	2	2	4	1	2	2	3	2	1	2	4	1	4	1	1	4	2	1	1	1	2	2	3	4	1
90	4	1	3	4	3	2	3	4	2	1	4	1	2	2	3	3	1	1	2	4	2	1	3	4	4	2	4	3	2	2	3	1	3	2	4	1	2	1	1	2	2	1	3	1	2	2	3	4	3
91	4	3	3	4	1	2	3	2	2	1	2	3	1	4	1	1	2	1	2	2	4	3	1	4	4	2	4	1	4	2	3	1	1	2	4	1	2	1	1	4	2	1	3	1	2	1	3	4	3
92	2	1	1	4	3	2	3	4	2	1	2	1	2	4	1	1	1	1	2	2	2	3	1	4	4	2	4	3	2	2	3	1	3	2	4	1	2	1	1	2	2	1	3	1	2	2	3	4	3
93	4	3	3	2	3	2	3	2	2	2	2	1	1	4	1	1	2	1	2	2	4	3	3	4	4	2	2	3	4	2	3	2	1	2	4	2	2	1	1	4	2	1	1	3	2	2	3	4	3
94	4	3	3	2	3	2	3	4	2	1	2	1	2	4	1	1	2	1	2	2	4	1	3	4	4	2	2	1	2	2	3	2	3	2	4	1	4	1	3	4	2	1	1	3	2	2	3	4	3
95	4	1	3	2	1	2	1	4	2	2	4	1	1	4	1	1	2	1	2	2	2	1	3	4	2	2	2	3	2	2	3	2	3	2	4	2	2	1	1	4	2	2	3	3	2	2	3	4	1
96	4	3	3	2	1	2	3	4	2	2	4	1	1	2	3	3	1	3	2	2	4	1	3	2	4	2	2	3	2	2	1	2	1	2	4	1	2	2	3	4	2	1	1	3	2	2	3	4	3
97	4	1	3	4	4	1	3	2	1	2	4	1	2	2	3	3	1	1	1	2	4	3	1	4	4	1	4	1	4	1	1	2	1	1	2	2	4	2	1	4	1	2	1	1	1	2	3	4	3
98	2	1	3	4	2	1	3	2	1	2	2	3	2	4	1	3	2	1	1	2	2	1	1	4	4	1	4	1	2	1	1	2	1	1	2	2	4	1	1	2	1	1	3	1	1	1	1	4	1
99	2	3	1	4	4	2	3	4	2	2	2	1	1	2	1	3	2	3	2	4	2	1	3	4	4	2	4	1	2	2	1	2	1	2	4	2	4	1	1	2	2	1	3	3	2	1	3	4	1
100	2	3	3	4	4	2	1	2	2	2	2	3	1	2	3	3	1	1	2	2	2	1	3	4	2	2	4	1	4	2	3	2	1	2	4	1	4	2	3	4	2	1	1	3	2	2	3	4	1
101	2	3	3	4	2	2	1	2	2	2	4	1	2	2	3	1	1	3	2	4	4	1	3	4	4	2	4	3	2	2	3	1	3	1	4	2	4	1	3	4	2	2	1	3	2	2	3	4	1
102	2	3	3	4	2	1	3	2	1	2	4	3	2	4	3	1	1	1	1	2	4	1	3	2	2	1	4	1	4	1	1	2	3	1	4	2	4	1	1	4	1	2	3	3	1	2	3	4	1
103	2	3	1	4	2	1	1	2	1	2	4	1	2	2	1	1	1	3	1	4	4	1	1	2	2	1	4	3	4	1	1	2	3	1	2	2	4	2	3	4	1	1	3	3	1	1	1	4	1
1	4	3	3	2	3	1	3	4	1	2	4	3	1	4	1	1	1	3	1	2	4	3	1	4	4	1	2	1	4	2	3	1	3	1	2	2	2	1	1	4	2	1	1	3	1	2	3	4	1
2	4	1	1	4	3	2	1	4	2	2	2	1	1	4	1	1	2	1	1	2	4	3	1	4	4	1	2	3	2	1	1	1	3	1	2	2	2	2	1	4	1	1	3	3	1	2	3	2	1
3	4	3	3	4	1	1	1	4	1	2	4	1	2	4	1	3	1	3	1	4	4	1	1	4	4	1	4	3	2	1	3	1	1	1	2	1	2	1	1	4	2	1	1	3	1	2	3	2	1
4	4	1	1	2	3	1	3	2	1	1	4	1	1	4	1	1	1	3	1	2	4	3	1	4	4	1	4	1	2	2	1	1	3	1	2	2	2	1	3	4	1	1	3	1	1	2	1	2	3
5	2	1	3	2	1	2	3	4	2	1	2	1	2	4	3	1	1	1	1	2	4	3	3	4	4	1	2	3	4	1	1	1	3	1	2	1	2	1	3	2	1	1	3	1	1	2	3	2	3
6	2	3	1	2	3	1	1	4	2	2	4	1	2	2	1	3	2	1	1	4	4	3	3	4	4	1	2	3	2	2	3	1	3	1	4	1	2	2	3	2	1	2	3	3	2	2	3	2	1
7	2	1	1	2	3	1	1	4	2	1	2	1	1	2	1	1	2	1	1	4	2	3	3	2	4	1	2	1	4	1	3	1	1	1	2	2	4	2	1	2	1	2	3	1	1	1	1	2	3
8	2	3	3	2	3	1	1	2	1	2	2	1	2	4	1	1	1	1	1	2	2	3	3	4	4	1	4	3	2	1	3	1	1	1	4	1	2	1	3	2	1	1	3	3	2	2	3	2	1
9	2	1	1	2	3	2	3	4	2	2	2	1	2	2	1	3	1	1	1	2	2	3	3	4	4	1	2	1	2	2	3	1	3	1	2	1	2	2	1	4	1	1	3	1	1	1	3	4	3
10	2	3	1	2	1	1	1	4	1	1	4	1	1	2	1	3	2	3	1	2	4	3	1	4	4	1	2	1	2	2	3	1	3	1	2	1	4	1	1	4	1	1	3	1	1	1	3	4	1
11	2	3	3	2	1	2	3	4	2	2	4	3	1	2	1	3	2	3	1	4	4	1	1	4	4	1	4	1	2	2	1	1	1	1	4	2	2	1	1	4	2	1	3	3	2	2	3	4	3
12	2	3	3	2	3	2	1	4	2	2	2	1	2	2	1	3	2	1	1	4	4	1	1	4	4	1	2	1	2	2	3	1	1	1	4	1	2	1	3	2	1	1	3	3	2	2	3	2	3
13	4	3	3	2	3	2	3	4	1	1	4	3	2	4	1	3	2	3	1	2	4	3	1	4	4	1	2	3	4	2	3	1	3	1	4	2	2	1	1	4	1	1	3	3	2	2	3	4	3
14	4	1	3	2	3	1	3	2	1	2	2	1	2	4	3	1	1	1	1	2	4	1	3	4	4	1	4	1	4	1	3	1	3	1	4	1	2	1	3	4	2	1	3	3	2	2	1	2	1
15	4	3	3	2	1	1	3	4	2	2	2	1	1	4	3	1	2	1	1	2	4	3	3	4	2	1	2	3	4	1	1	1	3	1	2	2	2	1	3	2	1	1	3	1	1	1	3	2	1
16	2	3	1	2	3	1	1	4	1	1	2	1	2	4	1	1	1	3	1	2	4	3	1	4	4	1	4	3	4	1	3	1	3	1	2	1	2	1	1	2	1	2	1	3	1	2	3	2	1
17	4	3	3	2	1	2	1	4	1	2	2	1	2	4	1	3	2	3	1	2	4	1	3	4	4	1	2	1	2	1	3	2	3	1	2	1	2	2	1	4	1	1	1	3	1	1	3	2	1
18	4	3	3	2	3	2	1	2	2	2	2	3	2	4	1	3	2	1	1	4	4	3	3	4	4	1	2	3	2	1	3	2	3	1	2	1	4	1	3	4	1	1	3	1	1	2	3	2	1
19	2	3	3	2	3	1	1	4	1	1	2	1	2	4	3	1	1	3	1	2	2	3	3	4	4	1	2	1	4	1	3	1	3	1	4	2	2	1	3	2	2	1	3	1	2	2	3	2	1
20	4	1	1	2	3	2	3	4	2	1	2	1	2	4	3	3	1	1	1	2	4	3	3	4	4	1	4	3	2	2	3	2	3	1	2	2	4	1	3	4	1	2	3	3	1	2	3	4	1
21	4	3	1	4	3	2	1	4	2	1	4	1	1	4	3	1	2	3	1	2	4	3	3	4	4	1	4	3	2	1	3	2	3	1	2	1	4	1	3	4	2	1	1	3	1	2	3	2	1
22	4	3	1	2	3	1	3	4	1	2	4	1	1	2	3	1	1	3	1	4	4	3	3	4	4	2	2	3	4	2	3	1	3	1	2	1	4	1	3	4	1	1	1	3	1	1	3	4	1
23	4	1	1	2	3	1	1	4	1	1	2	1	1	4	3	1	2	1	1	2	4	3	3	4	4	1	4	1	2	1	3	1	3	1	2	1	4	2	3	4	1	1	1	1	1	1	1	2	1
24	4	3	3	2	3	1	1	2	1	1	4	3	1	4	1	1	2	3	1	4	2	3	1	4	2	1	2	3	4	1	3	1	1	1	2	2	4	1	1	4	1	1	1	1	1	1	3	2	1
25	4	3	3	2	3	1	3	4	1	2	2	1	2	4	3	3	1	1	1	2	4	3	3	4	4	1	4	1	4	2	3	1	3	1	4	2	4	1	3	4	1	1	3	3	1	2	3	2	1
26	4	1	1	2	3	2	1	4	1	1	4	3	2	4	3	3	1	3	1	2	4	1	3	4	4	1	4	1	2	2	1	2	3	1	4	1	2	1	3	4	1	1	3	3	2	2	1	2	1
27	4	3	1	4	3	2	3	4	2	2	4	3	1	4	1	3	2	1	2	2	4	1	1	4	2	1	4	1	2	2	3	1	1	2	4	2	4	1	1	2	2	1	3	3	2	2	1	4	1
28	4	3	3	4	3	1	3	4	2	1	2	3	1	4	1	3	2	1	1	4	4	1	1	4	4	1	4	3	2	2	3	2	1	1	4	2	4	2	1	2	2	1	3	3	2	2	3	2	1
29	4	1	1	4	3	2	3	4	1	2	2	1	2	2	3	3	1	1	1	2	4	1	3	4	4	1	4	3	2	2	1	1	3	1	4	1	4	1	1	4	1	1	3	3	1	2	3	4	3
30	4	3	3	4	3	1	3	2	1	1	2	1	2	4	3	1	1	1	1	2	4	1	3	4	4	1	4	3	2	1	3	1	3	1	4	2	4	2	1	4	1	1	3	3	1	2	3	4	1
31	2	3	3	4	3	1	1	4	2	2	2	3	2	2	1	1	2	3	1	4	4	1	3	4	4	1	4	3	4	1	1	1	3	1	4	2	4	1	1	2	2	2	1	3	2	2	3	2	1
32	4	1	1	4	3	1	3	2	1	1	2	3	1	4	1	1	2	1	1	2	4	1	1	4	4	1	4	3	2	1	3	1	1	1	4	2	2	1	1	4	1	1	3	3	1	2	3	2	3
33	4	3	3	4	3	2	3	4	2	2	4	1	1	4	3	3	1	1	1	2	4	1	3	4	4	2	4	1	2	2	3	2	3	1	4	1	2	1	1	4	2	1	3	3	2	2	3	4	1
34	2	1	1	4	3	1	3	4	2	2	4	3	2	4	1	1	2	3	1	2	4	1	3	4	4	1	4	1	2	2	3	1	3	1	4	2	4	2	1	2	2	1	3	1	2	2	3	4	3
35	4	1	1	4	3	1	3	4	1	1	2	3	1	4	1	3	2	1	1	2	4	1	1	4	4	1	4	1	2	1	3	2	1	1	2	1	2	1	1	4	1	1	3	1	1	2	3	4	1
36	2	3	3	2	3	1	3	4	1	1	2	3	2	4	1	3	1	1	1	2	4	1	1	4	4	1	2	3	2	2	3	1	1	1	4	1	2	2	1	2	1	1	3	1	1	2	3	4	3
37	2	3	3	2	3	1	3	4	1	2	2	1	2	4	1	1	1	1	1	2	4	3	1	4	4	2	2	3	2	2	3	1	1	1	4	2	4	2	3	2	1	1	3	3	1	2	3	2	1
38	4	3	3	4	3	1	1	4	1	2	4	1	1	2	1	1	2	3	1	2	4	1	1	4	4	2	4	1	2	2	3	1	1	1	4	1	4	1	3	4	2	1	3	3	2	1	3	4	1
39	4	1	1	4	3	1	1	4	1	1	4	3	1	2	1	3	2	3	1	2	4	3	3	4	4	1	4	1	2	2	3	2	3	1	4	2	4	1	1	4	1	1	3	1	1	2	3	4	3
40	4	3	3	4	3	2	3	4	2	2	4	3	2	4	1	1	1	3	1	4	4	1	3	4	4	2	4	1	4	2	3	2	3	1	2	2	4	1	1	4	1	1	1	3	1	2	3	4	3
41	2	1	1	4	3	1	3	2	2	2	4	3	2	4	3	3	2	1	1	2	4	1	3	4	4	1	4	3	2	1	3	1	1	1	4	2	2	1	1	2	2	1	3	1	2	1	3	2	3
42	4	1	1	4	3	1	3	4	1	2	4	1	1	4	3	3	1	1	1	2	4	1	3	4	4	1	4	1	2	1	3	2	3	1	4	1	2	1	1	4	2	1	3	3	2	2	3	4	1
43	4	1	1	4	3	1	3	4	1	2	2	3	1	4	1	3	2	1	1	2	4	3	1	4	4	1	4	3	2	2	3	2	1	1	4	2	4	1	1	4	2	1	3	3	2	2	3	4	3
44	4	3	3	4	3	2	3	2	2	2	2	3	1	4	1	3	2	1	1	2	4	3	3	4	4	1	2	3	2	2	3	1	1	1	4	1	2	1	3	4	2	1	3	3	2	2	3	2	3
45	4	1	1	4	3	2	3	4	2	2	2	3	2	4	3	3	1	3	1	4	4	1	3	4	4	1	2	1	4	2	3	1	3	1	4	2	2	1	3	2	1	1	3	3	1	2	3	4	1
46	2	1	3	4	3	2	1	4	2	2	4	1	2	4	1	1	2	1	1	2	4	3	1	4	4	1	4	3	2	2	3	2	1	1	2	2	4	1	1	2	1	1	3	3	1	1	3	2	3
47	4	3	3	4	1	1	1	2	1	1	2	3	1	4	1	1	2	1	1	2	4	3	1	4	4	1	2	1	2	1	3	2	1	1	4	1	2	1	1	4	1	2	3	1	1	1	1	4	1
48	4	3	3	4	1	2	3	2	2	2	4	1	2	4	3	3	2	3	2	2	4	3	3	4	4	2	4	3	2	2	3	1	3	2	2	2	2	1	3	2	2	1	3	3	2	2	1	2	3
49	4	1	1	4	3	2	3	2	2	2	4	3	2	2	1	1	1	3	2	2	4	3	1	4	4	1	4	1	2	1	1	1	3	2	4	2	2	2	1	2	2	1	3	3	2	2	3	4	1
50	4	3	3	4	3	1	3	2	1	2	2	3	2	4	3	3	1	1	1	2	4	3	3	4	4	1	2	3	2	1	3	1	1	1	4	2	2	1	3	2	1	1	3	3	1	2	3	2	1
51	2	1	1	4	3	1	1	2	1	1	2	1	2	4	3	3	2	1	2	2	4	3	1	4	4	1	2	3	2	2	3	1	3	2	4	2	2	1	3	2	1	1	3	3	1	1	1	2	3
52	4	3	3	4	1	1	3	4	2	2	4	1	1	4	1	1	2	3	2	4	2	3	3	4	4	2	4	3	4	1	1	1	3	2	4	1	2	1	1	4	2	1	3	3	2	2	3	4	3
53	2	1	1	4	3	2	3	4	2	1	2	3	2	2	3	1	2	1	1	2	4	3	1	4	4	2	4	3	2	1	3	1	3	1	4	2	2	1	1	2	2	2	3	3	2	2	3	2	3
54	2	1	1	4	3	1	3	2	2	2	2	1	1	4	3	1	2	1	1	2	4	3	3	4	4	2	4	1	2	2	1	1	3	1	2	2	2	1	3	2	1	1	3	3	1	1	3	4	1
55	4	1	1	2	3	1	1	4	2	1	2	3	2	4	3	3	1	1	2	2	4	3	3	4	4	2	4	1	2	1	3	1	3	2	4	1	2	1	1	2	2	1	3	3	2	2	3	4	1
56	4	1	1	2	3	2	3	4	2	2	4	1	2	4	1	1	1	3	1	2	4	3	3	4	4	2	4	1	2	2	3	1	3	1	4	2	4	1	1	2	2	1	3	3	2	1	1	2	1
57	4	3	1	4	3	1	1	4	1	1	2	3	2	4	3	1	2	1	2	2	4	3	3	4	4	2	4	3	2	2	1	1	3	2	2	1	4	1	3	2	2	1	3	3	2	2	3	4	1
58	2	1	1	4	3	2	1	4	2	2	2	3	2	2	1	3	1	1	1	2	4	3	3	4	2	2	2	1	2	1	3	1	1	1	2	2	2	1	1	2	2	1	3	3	2	2	3	2	1
59	2	1	1	4	1	1	1	4	2	1	2	3	2	2	3	3	2	3	2	2	4	3	3	4	2	2	2	3	4	1	1	1	1	2	2	2	4	1	1	2	2	2	1	3	2	1	3	2	3
60	4	1	3	4	3	2	3	2	2	2	2	3	1	4	3	3	1	1	1	2	4	3	3	4	4	2	2	3	2	1	3	2	3	1	2	1	2	2	3	4	2	1	3	3	2	1	3	2	1
61	4	3	1	2	3	1	3	2	1	1	2	1	2	4	1	3	2	1	1	2	4	3	1	4	4	2	2	3	2	2	3	1	1	1	2	2	4	1	1	2	2	1	3	3	2	2	3	2	1
62	2	1	1	4	3	2	3	2	2	2	2	3	2	4	3	3	2	1	1	2	4	3	3	4	2	2	2	1	2	2	3	1	3	1	4	2	2	1	3	2	2	1	3	3	2	2	3	2	1
63	2	1	1	4	3	2	3	2	2	1	2	3	2	4	3	3	2	1	1	4	4	1	3	4	4	2	2	3	2	2	3	1	3	1	4	2	2	1	3	2	2	1	3	3	2	2	3	2	1
64	2	1	1	4	3	2	3	2	2	1	4	3	2	2	3	3	2	1	2	4	4	3	3	4	4	2	4	3	2	2	3	1	1	2	4	2	4	1	3	2	2	2	3	3	2	2	3	4	3
65	4	1	3	4	3	2	3	2	2	2	2	3	1	4	3	3	1	1	2	2	4	1	3	4	2	2	2	3	4	1	3	1	3	2	2	2	2	1	1	2	2	2	3	3	2	2	3	2	3
66	4	3	3	4	1	1	1	4	2	1	2	1	1	4	1	3	1	3	2	2	4	1	1	4	2	2	2	1	2	1	1	1	3	2	2	2	4	1	3	2	2	1	1	3	1	2	3	2	3
67	4	1	1	2	3	1	3	4	1	1	2	3	1	4	3	3	1	1	1	2	4	3	3	4	4	2	2	3	2	2	3	1	3	1	2	1	2	1	1	4	1	2	3	3	1	2	3	4	3
68	4	3	3	4	3	2	3	2	2	1	2	3	1	4	3	3	2	1	1	2	4	3	3	4	2	2	4	1	2	2	1	2	3	1	2	2	2	1	1	2	2	1	3	3	2	1	3	2	3
69	4	1	3	2	3	2	1	4	2	1	2	3	1	4	3	3	2	3	1	4	2	3	3	4	2	2	4	3	2	2	3	2	1	1	2	1	4	1	3	4	2	1	3	3	2	2	1	2	1
70	4	1	3	2	3	1	3	4	2	2	2	3	2	2	3	1	2	3	2	2	4	3	3	4	2	2	2	1	2	1	3	2	3	2	2	2	2	1	1	2	2	1	3	3	2	1	3	2	1
71	4	3	3	2	3	2	1	4	2	1	2	3	2	2	3	1	1	3	2	2	4	1	3	4	4	2	2	1	2	2	1	1	3	2	4	2	2	1	3	2	2	1	1	3	2	1	3	2	1
72	4	1	3	2	1	2	1	4	2	2	4	3	1	2	3	1	1	3	2	4	4	3	3	4	4	2	2	1	4	2	1	1	1	2	2	2	2	1	3	2	2	1	1	3	2	2	3	2	1
73	4	3	3	2	3	2	3	4	2	1	2	3	2	2	3	3	1	3	2	4	2	3	3	2	4	2	2	3	4	2	3	1	1	2	4	2	2	1	3	2	2	1	3	3	2	2	1	2	1
74	2	1	3	4	3	2	3	4	2	2	2	3	2	4	1	3	2	3	2	2	4	3	3	2	2	2	2	1	2	1	3	2	3	2	2	2	4	2	3	2	2	1	3	3	2	1	1	2	3
75	4	1	1	4	3	2	3	4	2	2	2	1	1	2	3	1	2	3	1	4	4	3	3	2	2	2	2	1	2	2	1	2	3	1	4	2	4	2	3	2	2	1	1	3	2	2	3	2	1
76	2	3	3	4	3	2	1	4	2	2	2	3	2	4	3	1	2	1	1	2	2	3	3	4	4	2	2	3	4	1	3	2	3	1	2	1	2	2	3	2	2	1	3	1	2	2	3	2	1
77	4	1	3	2	3	2	3	2	2	2	2	3	2	2	3	3	2	1	2	2	4	3	3	4	4	2	2	3	4	2	1	2	3	2	2	1	2	2	3	2	2	1	3	1	2	2	3	2	1
78	4	3	3	4	3	2	1	4	2	2	2	1	2	4	3	3	2	3	2	2	4	1	3	4	2	2	2	1	2	2	1	2	3	2	2	1	2	1	1	2	2	1	1	1	2	2	3	2	1
79	4	3	1	2	1	2	3	4	2	1	4	3	2	2	3	3	1	1	1	2	2	3	3	2	2	2	2	3	4	2	1	1	3	1	4	1	4	1	1	2	2	1	3	1	2	2	3	2	1
80	4	1	1	2	3	2	3	4	2	2	2	1	1	2	3	3	2	1	2	2	4	3	1	4	2	2	4	3	4	2	3	2	1	2	4	1	4	1	1	4	2	2	3	1	2	2	3	4	3
81	4	3	3	4	3	2	1	2	2	2	2	1	2	2	1	1	1	1	2	4	4	3	3	4	4	2	4	3	4	2	1	2	3	2	4	1	4	2	3	2	2	1	3	1	2	2	1	4	3
82	2	1	3	4	3	2	3	4	2	2	2	1	2	4	3	3	2	3	2	2	4	1	1	4	4	2	4	3	2	2	1	2	3	2	4	1	4	1	1	2	2	2	3	1	2	2	3	4	1
83	4	1	1	2	1	2	3	4	2	1	4	1	1	2	1	1	1	3	2	2	4	1	1	4	4	2	4	1	4	2	1	1	1	2	4	1	2	1	1	2	2	1	3	1	2	1	3	4	1
84	4	3	1	4	3	2	3	2	2	2	2	1	1	2	1	1	1	1	2	4	4	1	1	4	2	2	4	1	4	2	3	2	1	2	4	1	4	2	1	4	2	1	1	1	2	2	1	4	3
85	4	3	3	4	1	2	3	2	2	1	2	1	2	4	1	3	2	1	2	4	4	3	3	4	4	2	4	3	2	2	1	2	3	2	4	1	2	2	1	2	2	1	3	1	2	2	1	4	3
86	4	3	3	4	3	1	3	2	1	2	2	1	2	4	3	1	2	3	1	4	4	3	1	4	2	2	4	3	4	2	3	2	3	1	4	1	2	1	1	2	2	2	3	1	2	2	3	2	3
87	2	3	3	4	3	2	1	4	2	2	2	1	2	4	1	3	1	1	2	2	4	3	1	4	2	2	4	3	2	2	1	2	3	2	2	1	4	1	1	2	2	1	3	1	1	2	3	2	1
88	2	3	3	4	3	2	3	4	2	2	2	1	2	2	3	3	2	3	2	2	4	1	1	4	4	2	4	3	2	2	3	2	3	2	4	1	2	2	1	2	2	1	3	1	2	2	3	4	1
89	4	3	1	4	3	2	3	4	2	1	2	1	1	2	3	3	2	3	2	2	2	1	1	4	2	2	4	1	2	2	3	2	1	2	4	1	4	1	1	4	2	1	1	1	2	2	3	4	1
90	4	1	3	4	3	2	3	4	2	1	4	1	2	2	3	3	1	1	2	4	2	1	3	4	4	2	4	3	2	2	3	1	3	2	4	1	2	1	1	2	2	1	3	1	2	2	3	4	3
91	4	3	3	4	1	2	3	2	2	1	2	3	1	4	1	1	2	1	2	2	4	3	1	4	4	2	4	1	4	2	3	1	1	2	4	1	2	1	1	4	2	1	3	1	2	1	3	4	3
92	2	1	1	4	3	2	3	4	2	1	2	1	2	4	1	1	1	1	2	2	2	3	1	4	4	2	4	3	2	2	3	1	3	2	4	1	2	1	1	2	2	1	3	1	2	2	3	4	3
93	4	3	3	2	3	2	3	2	2	2	2	1	1	4	1	1	2	1	2	2	4	3	3	4	4	2	2	3	4	2	3	2	1	2	4	2	2	1	1	4	2	1	1	3	2	2	3	4	3
94	4	3	3	2	3	2	3	4	2	1	2	1	2	4	1	1	2	1	2	2	4	1	3	4	4	2	2	1	2	2	3	2	3	2	4	1	4	1	3	4	2	1	1	3	2	2	3	4	3
95	4	1	3	2	1	2	1	4	2	2	4	1	1	4	1	1	2	1	2	2	2	1	3	4	2	2	2	3	2	2	3	2	3	2	4	2	2	1	1	4	2	2	3	3	2	2	3	4	1
96	4	3	3	2	1	2	3	4	2	2	4	1	1	2	3	3	1	3	2	2	4	1	3	2	4	2	2	3	2	2	1	2	1	2	4	1	2	2	3	4	2	1	1	3	2	2	3	4	3
97	4	1	3	4	4	1	3	2	1	2	4	1	2	2	3	3	1	1	1	2	4	3	1	4	4	1	4	1	4	1	1	2	1	1	2	2	4	2	1	4	1	2	1	1	1	2	3	4	3
98	2	1	3	4	2	1	3	2	1	2	2	3	2	4	1	3	2	1	1	2	2	1	1	4	4	1	4	1	2	1	1	2	1	1	2	2	4	1	1	2	1	1	3	1	1	1	1	4	1
99	2	3	1	4	4	2	3	4	2	2	2	1	1	2	1	3	2	3	2	4	2	1	3	4	4	2	4	1	2	2	1	2	1	2	4	2	4	1	1	2	2	1	3	3	2	1	3	4	1
100	2	3	3	4	4	2	1	2	2	2	2	3	1	2	3	3	1	1	2	2	2	1	3	4	2	2	4	1	4	2	3	2	1	2	4	1	4	2	3	4	2	1	1	3	2	2	3	4	1
101	2	3	3	4	2	2	1	2	2	2	4	1	2	2	3	1	1	3	2	4	4	1	3	4	4	2	4	3	2	2	3	1	3	1	4	2	4	1	3	4	2	2	1	3	2	2	3	4	1
102	2	3	3	4	2	1	3	2	1	2	4	3	2	4	3	1	1	1	1	2	4	1	3	2	2	1	4	1	4	1	1	2	3	1	4	2	4	1	1	4	1	2	3	3	1	2	3	4	1
103	2	3	1	4	2	1	1	2	1	2	4	1	2	2	1	1	1	3	1	4	4	1	1	2	2	1	4	3	4	1	1	2	3	1	2	2	4	2	3	4	1	1	3	3	1	1	1	4	1
1	4	3	3	2	3	1	3	4	1	2	4	3	1	4	1	1	1	3	1	2	4	3	1	4	4	1	2	1	4	2	3	1	3	1	2	2	2	1	1	4	2	1	1	3	1	2	3	4	1
2	4	1	1	4	3	2	1	4	2	2	2	1	1	4	1	1	2	1	1	2	4	3	1	4	4	1	2	3	2	1	1	1	3	1	2	2	2	2	1	4	1	1	3	3	1	2	3	2	1
3	4	3	3	4	1	1	1	4	1	2	4	1	2	4	1	3	1	3	1	4	4	1	1	4	4	1	4	3	2	1	3	1	1	1	2	1	2	1	1	4	2	1	1	3	1	2	3	2	1
4	4	1	1	2	3	1	3	2	1	1	4	1	1	4	1	1	1	3	1	2	4	3	1	4	4	1	4	1	2	2	1	1	3	1	2	2	2	1	3	4	1	1	3	1	1	2	1	2	3
5	2	1	3	2	1	2	3	4	2	1	2	1	2	4	3	1	1	1	1	2	4	3	3	4	4	1	2	3	4	1	1	1	3	1	2	1	2	1	3	2	1	1	3	1	1	2	3	2	3
6	2	3	1	2	3	1	1	4	2	2	4	1	2	2	1	3	2	1	1	4	4	3	3	4	4	1	2	3	2	2	3	1	3	1	4	1	2	2	3	2	1	2	3	3	2	2	3	2	1
7	2	1	1	2	3	1	1	4	2	1	2	1	1	2	1	1	2	1	1	4	2	3	3	2	4	1	2	1	4	1	3	1	1	1	2	2	4	2	1	2	1	2	3	1	1	1	1	2	3
8	2	3	3	2	3	1	1	2	1	2	2	1	2	4	1	1	1	1	1	2	2	3	3	4	4	1	4	3	2	1	3	1	1	1	4	1	2	1	3	2	1	1	3	3	2	2	3	2	1
9	2	1	1	2	3	2	3	4	2	2	2	1	2	2	1	3	1	1	1	2	2	3	3	4	4	1	2	1	2	2	3	1	3	1	2	1	2	2	1	4	1	1	3	1	1	1	3	4	3
10	2	3	1	2	1	1	1	4	1	1	4	1	1	2	1	3	2	3	1	2	4	3	1	4	4	1	2	1	2	2	3	1	3	1	2	1	4	1	1	4	1	1	3	1	1	1	3	4	1
11	2	3	3	2	1	2	3	4	2	2	4	3	1	2	1	3	2	3	1	4	4	1	1	4	4	1	4	1	2	2	1	1	1	1	4	2	2	1	1	4	2	1	3	3	2	2	3	4	3
12	2	3	3	2	3	2	1	4	2	2	2	1	2	2	1	3	2	1	1	4	4	1	1	4	4	1	2	1	2	2	3	1	1	1	4	1	2	1	3	2	1	1	3	3	2	2	3	2	3
13	4	3	3	2	3	2	3	4	1	1	4	3	2	4	1	3	2	3	1	2	4	3	1	4	4	1	2	3	4	2	3	1	3	1	4	2	2	1	1	4	1	1	3	3	2	2	3	4	3
14	4	1	3	2	3	1	3	2	1	2	2	1	2	4	3	1	1	1	1	2	4	1	3	4	4	1	4	1	4	1	3	1	3	1	4	1	2	1	3	4	2	1	3	3	2	2	1	2	1
15	4	3	3	2	1	1	3	4	2	2	2	1	1	4	3	1	2	1	1	2	4	3	3	4	2	1	2	3	4	1	1	1	3	1	2	2	2	1	3	2	1	1	3	1	1	1	3	2	1
16	2	3	1	2	3	1	1	4	1	1	2	1	2	4	1	1	1	3	1	2	4	3	1	4	4	1	4	3	4	1	3	1	3	1	2	1	2	1	1	2	1	2	1	3	1	2	3	2	1
17	4	3	3	2	1	2	1	4	1	2	2	1	2	4	1	3	2	3	1	2	4	1	3	4	4	1	2	1	2	1	3	2	3	1	2	1	2	2	1	4	1	1	1	3	1	1	3	2	1
18	4	3	3	2	3	2	1	2	2	2	2	3	2	4	1	3	2	1	1	4	4	3	3	4	4	1	2	3	2	1	3	2	3	1	2	1	4	1	3	4	1	1	3	1	1	2	3	2	1
19	2	3	3	2	3	1	1	4	1	1	2	1	2	4	3	1	1	3	1	2	2	3	3	4	4	1	2	1	4	1	3	1	3	1	4	2	2	1	3	2	2	1	3	1	2	2	3	2	1
20	4	1	1	2	3	2	3	4	2	1	2	1	2	4	3	3	1	1	1	2	4	3	3	4	4	1	4	3	2	2	3	2	3	1	2	2	4	1	3	4	1	2	3	3	1	2	3	4	1
21	4	3	1	4	3	2	1	4	2	1	4	1	1	4	3	1	2	3	1	2	4	3	3	4	4	1	4	3	2	1	3	2	3	1	2	1	4	1	3	4	2	1	1	3	1	2	3	2	1
22	4	3	1	2	3	1	3	4	1	2	4	1	1	2	3	1	1	3	1	4	4	3	3	4	4	2	2	3	4	2	3	1	3	1	2	1	4	1	3	4	1	1	1	3	1	1	3	4	1
23	4	1	1	2	3	1	1	4	1	1	2	1	1	4	3	1	2	1	1	2	4	3	3	4	4	1	4	1	2	1	3	1	3	1	2	1	4	2	3	4	1	1	1	1	1	1	1	2	1
24	4	3	3	2	3	1	1	2	1	1	4	3	1	4	1	1	2	3	1	4	2	3	1	4	2	1	2	3	4	1	3	1	1	1	2	2	4	1	1	4	1	1	1	1	1	1	3	2	1
25	4	3	3	2	3	1	3	4	1	2	2	1	2	4	3	3	1	1	1	2	4	3	3	4	4	1	4	1	4	2	3	1	3	1	4	2	4	1	3	4	1	1	3	3	1	2	3	2	1
26	4	1	1	2	3	2	1	4	1	1	4	3	2	4	3	3	1	3	1	2	4	1	3	4	4	1	4	1	2	2	1	2	3	1	4	1	2	1	3	4	1	1	3	3	2	2	1	2	1
27	4	3	1	4	3	2	3	4	2	2	4	3	1	4	1	3	2	1	2	2	4	1	1	4	2	1	4	1	2	2	3	1	1	2	4	2	4	1	1	2	2	1	3	3	2	2	1	4	1
28	4	3	3	4	3	1	3	4	2	1	2	3	1	4	1	3	2	1	1	4	4	1	1	4	4	1	4	3	2	2	3	2	1	1	4	2	4	2	1	2	2	1	3	3	2	2	3	2	1
29	4	1	1	4	3	2	3	4	1	2	2	1	2	2	3	3	1	1	1	2	4	1	3	4	4	1	4	3	2	2	1	1	3	1	4	1	4	1	1	4	1	1	3	3	1	2	3	4	3
30	4	3	3	4	3	1	3	2	1	1	2	1	2	4	3	1	1	1	1	2	4	1	3	4	4	1	4	3	2	1	3	1	3	1	4	2	4	2	1	4	1	1	3	3	1	2	3	4	1
31	2	3	3	4	3	1	1	4	2	2	2	3	2	2	1	1	2	3	1	4	4	1	3	4	4	1	4	3	4	1	1	1	3	1	4	2	4	1	1	2	2	2	1	3	2	2	3	2	1
32	4	1	1	4	3	1	3	2	1	1	2	3	1	4	1	1	2	1	1	2	4	1	1	4	4	1	4	3	2	1	3	1	1	1	4	2	2	1	1	4	1	1	3	3	1	2	3	2	3
33	4	3	3	4	3	2	3	4	2	2	4	1	1	4	3	3	1	1	1	2	4	1	3	4	4	2	4	1	2	2	3	2	3	1	4	1	2	1	1	4	2	1	3	3	2	2	3	4	1
34	2	1	1	4	3	1	3	4	2	2	4	3	2	4	1	1	2	3	1	2	4	1	3	4	4	1	4	1	2	2	3	1	3	1	4	2	4	2	1	2	2	1	3	1	2	2	3	4	3
35	4	1	1	4	3	1	3	4	1	1	2	3	1	4	1	3	2	1	1	2	4	1	1	4	4	1	4	1	2	1	3	2	1	1	2	1	2	1	1	4	1	1	3	1	1	2	3	4	1
36	2	3	3	2	3	1	3	4	1	1	2	3	2	4	1	3	1	1	1	2	4	1	1	4	4	1	2	3	2	2	3	1	1	1	4	1	2	2	1	2	1	1	3	1	1	2	3	4	3
37	2	3	3	2	3	1	3	4	1	2	2	1	2	4	1	1	1	1	1	2	4	3	1	4	4	2	2	3	2	2	3	1	1	1	4	2	4	2	3	2	1	1	3	3	1	2	3	2	1
38	4	3	3	4	3	1	1	4	1	2	4	1	1	2	1	1	2	3	1	2	4	1	1	4	4	2	4	1	2	2	3	1	1	1	4	1	4	1	3	4	2	1	3	3	2	1	3	4	1
39	4	1	1	4	3	1	1	4	1	1	4	3	1	2	1	3	2	3	1	2	4	3	3	4	4	1	4	1	2	2	3	2	3	1	4	2	4	1	1	4	1	1	3	1	1	2	3	4	3
40	4	3	3	4	3	2	3	4	2	2	4	3	2	4	1	1	1	3	1	4	4	1	3	4	4	2	4	1	4	2	3	2	3	1	2	2	4	1	1	4	1	1	1	3	1	2	3	4	3
41	2	1	1	4	3	1	3	2	2	2	4	3	2	4	3	3	2	1	1	2	4	1	3	4	4	1	4	3	2	1	3	1	1	1	4	2	2	1	1	2	2	1	3	1	2	1	3	2	3
42	4	1	1	4	3	1	3	4	1	2	4	1	1	4	3	3	1	1	1	2	4	1	3	4	4	1	4	1	2	1	3	2	3	1	4	1	2	1	1	4	2	1	3	3	2	2	3	4	1
43	4	1	1	4	3	1	3	4	1	2	2	3	1	4	1	3	2	1	1	2	4	3	1	4	4	1	4	3	2	2	3	2	1	1	4	2	4	1	1	4	2	1	3	3	2	2	3	4	3
44	4	3	3	4	3	2	3	2	2	2	2	3	1	4	1	3	2	1	1	2	4	3	3	4	4	1	2	3	2	2	3	1	1	1	4	1	2	1	3	4	2	1	3	3	2	2	3	2	3
45	4	1	1	4	3	2	3	4	2	2	2	3	2	4	3	3	1	3	1	4	4	1	3	4	4	1	2	1	4	2	3	1	3	1	4	2	2	1	3	2	1	1	3	3	1	2	3	4	1
46	2	1	3	4	3	2	1	4	2	2	4	1	2	4	1	1	2	1	1	2	4	3	1	4	4	1	4	3	2	2	3	2	1	1	2	2	4	1	1	2	1	1	3	3	1	1	3	2	3
47	4	3	3	4	1	1	1	2	1	1	2	3	1	4	1	1	2	1	1	2	4	3	1	4	4	1	2	1	2	1	3	2	1	1	4	1	2	1	1	4	1	2	3	1	1	1	1	4	1
48	4	3	3	4	1	2	3	2	2	2	4	1	2	4	3	3	2	3	2	2	4	3	3	4	4	2	4	3	2	2	3	1	3	2	2	2	2	1	3	2	2	1	3	3	2	2	1	2	3
49	4	1	1	4	3	2	3	2	2	2	4	3	2	2	1	1	1	3	2	2	4	3	1	4	4	1	4	1	2	1	1	1	3	2	4	2	2	2	1	2	2	1	3	3	2	2	3	4	1
50	4	3	3	4	3	1	3	2	1	2	2	3	2	4	3	3	1	1	1	2	4	3	3	4	4	1	2	3	2	1	3	1	1	1	4	2	2	1	3	2	1	1	3	3	1	2	3	2	1
51	2	1	1	4	3	1	1	2	1	1	2	1	2	4	3	3	2	1	2	2	4	3	1	4	4	1	2	3	2	2	3	1	3	2	4	2	2	1	3	2	1	1	3	3	1	1	1	2	3
52	4	3	3	4	1	1	3	4	2	2	4	1	1	4	1	1	2	3	2	4	2	3	3	4	4	2	4	3	4	1	1	1	3	2	4	1	2	1	1	4	2	1	3	3	2	2	3	4	3
53	2	1	1	4	3	2	3	4	2	1	2	3	2	2	3	1	2	1	1	2	4	3	1	4	4	2	4	3	2	1	3	1	3	1	4	2	2	1	1	2	2	2	3	3	2	2	3	2	3
54	2	1	1	4	3	1	3	2	2	2	2	1	1	4	3	1	2	1	1	2	4	3	3	4	4	2	4	1	2	2	1	1	3	1	2	2	2	1	3	2	1	1	3	3	1	1	3	4	1
55	4	1	1	2	3	1	1	4	2	1	2	3	2	4	3	3	1	1	2	2	4	3	3	4	4	2	4	1	2	1	3	1	3	2	4	1	2	1	1	2	2	1	3	3	2	2	3	4	1
56	4	1	1	2	3	2	3	4	2	2	4	1	2	4	1	1	1	3	1	2	4	3	3	4	4	2	4	1	2	2	3	1	3	1	4	2	4	1	1	2	2	1	3	3	2	1	1	2	1
57	4	3	1	4	3	1	1	4	1	1	2	3	2	4	3	1	2	1	2	2	4	3	3	4	4	2	4	3	2	2	1	1	3	2	2	1	4	1	3	2	2	1	3	3	2	2	3	4	1
58	2	1	1	4	3	2	1	4	2	2	2	3	2	2	1	3	1	1	1	2	4	3	3	4	2	2	2	1	2	1	3	1	1	1	2	2	2	1	1	2	2	1	3	3	2	2	3	2	1
59	2	1	1	4	1	1	1	4	2	1	2	3	2	2	3	3	2	3	2	2	4	3	3	4	2	2	2	3	4	1	1	1	1	2	2	2	4	1	1	2	2	2	1	3	2	1	3	2	3
60	4	1	3	4	3	2	3	2	2	2	2	3	1	4	3	3	1	1	1	2	4	3	3	4	4	2	2	3	2	1	3	2	3	1	2	1	2	2	3	4	2	1	3	3	2	1	3	2	1
61	4	3	1	2	3	1	3	2	1	1	2	1	2	4	1	3	2	1	1	2	4	3	1	4	4	2	2	3	2	2	3	1	1	1	2	2	4	1	1	2	2	1	3	3	2	2	3	2	1
62	2	1	1	4	3	2	3	2	2	2	2	3	2	4	3	3	2	1	1	2	4	3	3	4	2	2	2	1	2	2	3	1	3	1	4	2	2	1	3	2	2	1	3	3	2	2	3	2	1
63	2	1	1	4	3	2	3	2	2	1	2	3	2	4	3	3	2	1	1	4	4	1	3	4	4	2	2	3	2	2	3	1	3	1	4	2	2	1	3	2	2	1	3	3	2	2	3	2	1
64	2	1	1	4	3	2	3	2	2	1	4	3	2	2	3	3	2	1	2	4	4	3	3	4	4	2	4	3	2	2	3	1	1	2	4	2	4	1	3	2	2	2	3	3	2	2	3	4	3
65	4	1	3	4	3	2	3	2	2	2	2	3	1	4	3	3	1	1	2	2	4	1	3	4	2	2	2	3	4	1	3	1	3	2	2	2	2	1	1	2	2	2	3	3	2	2	3	2	3
66	4	3	3	4	1	1	1	4	2	1	2	1	1	4	1	3	1	3	2	2	4	1	1	4	2	2	2	1	2	1	1	1	3	2	2	2	4	1	3	2	2	1	1	3	1	2	3	2	3
67	4	1	1	2	3	1	3	4	1	1	2	3	1	4	3	3	1	1	1	2	4	3	3	4	4	2	2	3	2	2	3	1	3	1	2	1	2	1	1	4	1	2	3	3	1	2	3	4	3
68	4	3	3	4	3	2	3	2	2	1	2	3	1	4	3	3	2	1	1	2	4	3	3	4	2	2	4	1	2	2	1	2	3	1	2	2	2	1	1	2	2	1	3	3	2	1	3	2	3
69	4	1	3	2	3	2	1	4	2	1	2	3	1	4	3	3	2	3	1	4	2	3	3	4	2	2	4	3	2	2	3	2	1	1	2	1	4	1	3	4	2	1	3	3	2	2	1	2	1
70	4	1	3	2	3	1	3	4	2	2	2	3	2	2	3	1	2	3	2	2	4	3	3	4	2	2	2	1	2	1	3	2	3	2	2	2	2	1	1	2	2	1	3	3	2	1	3	2	1
71	4	3	3	2	3	2	1	4	2	1	2	3	2	2	3	1	1	3	2	2	4	1	3	4	4	2	2	1	2	2	1	1	3	2	4	2	2	1	3	2	2	1	1	3	2	1	3	2	1
72	4	1	3	2	1	2	1	4	2	2	4	3	1	2	3	1	1	3	2	4	4	3	3	4	4	2	2	1	4	2	1	1	1	2	2	2	2	1	3	2	2	1	1	3	2	2	3	2	1
73	4	3	3	2	3	2	3	4	2	1	2	3	2	2	3	3	1	3	2	4	2	3	3	2	4	2	2	3	4	2	3	1	1	2	4	2	2	1	3	2	2	1	3	3	2	2	1	2	1
74	2	1	3	4	3	2	3	4	2	2	2	3	2	4	1	3	2	3	2	2	4	3	3	2	2	2	2	1	2	1	3	2	3	2	2	2	4	2	3	2	2	1	3	3	2	1	1	2	3
75	4	1	1	4	3	2	3	4	2	2	2	1	1	2	3	1	2	3	1	4	4	3	3	2	2	2	2	1	2	2	1	2	3	1	4	2	4	2	3	2	2	1	1	3	2	2	3	2	1
76	2	3	3	4	3	2	1	4	2	2	2	3	2	4	3	1	2	1	1	2	2	3	3	4	4	2	2	3	4	1	3	2	3	1	2	1	2	2	3	2	2	1	3	1	2	2	3	2	1
77	4	1	3	2	3	2	3	2	2	2	2	3	2	2	3	3	2	1	2	2	4	3	3	4	4	2	2	3	4	2	1	2	3	2	2	1	2	2	3	2	2	1	3	1	2	2	3	2	1
78	4	3	3	4	3	2	1	4	2	2	2	1	2	4	3	3	2	3	2	2	4	1	3	4	2	2	2	1	2	2	1	2	3	2	2	1	2	1	1	2	2	1	1	1	2	2	3	2	1
79	4	3	1	2	1	2	3	4	2	1	4	3	2	2	3	3	1	1	1	2	2	3	3	2	2	2	2	3	4	2	1	1	3	1	4	1	4	1	1	2	2	1	3	1	2	2	3	2	1
80	4	1	1	2	3	2	3	4	2	2	2	1	1	2	3	3	2	1	2	2	4	3	1	4	2	2	4	3	4	2	3	2	1	2	4	1	4	1	1	4	2	2	3	1	2	2	3	4	3
81	4	3	3	4	3	2	1	2	2	2	2	1	2	2	1	1	1	1	2	4	4	3	3	4	4	2	4	3	4	2	1	2	3	2	4	1	4	2	3	2	2	1	3	1	2	2	1	4	3
82	2	1	3	4	3	2	3	4	2	2	2	1	2	4	3	3	2	3	2	2	4	1	1	4	4	2	4	3	2	2	1	2	3	2	4	1	4	1	1	2	2	2	3	1	2	2	3	4	1
83	4	1	1	2	1	2	3	4	2	1	4	1	1	2	1	1	1	3	2	2	4	1	1	4	4	2	4	1	4	2	1	1	1	2	4	1	2	1	1	2	2	1	3	1	2	1	3	4	1
84	4	3	1	4	3	2	3	2	2	2	2	1	1	2	1	1	1	1	2	4	4	1	1	4	2	2	4	1	4	2	3	2	1	2	4	1	4	2	1	4	2	1	1	1	2	2	1	4	3
85	4	3	3	4	1	2	3	2	2	1	2	1	2	4	1	3	2	1	2	4	4	3	3	4	4	2	4	3	2	2	1	2	3	2	4	1	2	2	1	2	2	1	3	1	2	2	1	4	3
86	4	3	3	4	3	1	3	2	1	2	2	1	2	4	3	1	2	3	1	4	4	3	1	4	2	2	4	3	4	2	3	2	3	1	4	1	2	1	1	2	2	2	3	1	2	2	3	2	3
87	2	3	3	4	3	2	1	4	2	2	2	1	2	4	1	3	1	1	2	2	4	3	1	4	2	2	4	3	2	2	1	2	3	2	2	1	4	1	1	2	2	1	3	1	1	2	3	2	1
88	2	3	3	4	3	2	3	4	2	2	2	1	2	2	3	3	2	3	2	2	4	1	1	4	4	2	4	3	2	2	3	2	3	2	4	1	2	2	1	2	2	1	3	1	2	2	3	4	1
89	4	3	1	4	3	2	3	4	2	1	2	1	1	2	3	3	2	3	2	2	2	1	1	4	2	2	4	1	2	2	3	2	1	2	4	1	4	1	1	4	2	1	1	1	2	2	3	4	1
90	4	1	3	4	3	2	3	4	2	1	4	1	2	2	3	3	1	1	2	4	2	1	3	4	4	2	4	3	2	2	3	1	3	2	4	1	2	1	1	2	2	1	3	1	2	2	3	4	3
91	4	3	3	4	1	2	3	2	2	1	2	3	1	4	1	1	2	1	2	2	4	3	1	4	4	2	4	1	4	2	3	1	1	2	4	1	2	1	1	4	2	1	3	1	2	1	3	4	3
92	2	1	1	4	3	2	3	4	2	1	2	1	2	4	1	1	1	1	2	2	2	3	1	4	4	2	4	3	2	2	3	1	3	2	4	1	2	1	1	2	2	1	3	1	2	2	3	4	3
93	4	3	3	2	3	2	3	2	2	2	2	1	1	4	1	1	2	1	2	2	4	3	3	4	4	2	2	3	4	2	3	2	1	2	4	2	2	1	1	4	2	1	1	3	2	2	3	4	3
94	4	3	3	2	3	2	3	4	2	1	2	1	2	4	1	1	2	1	2	2	4	1	3	4	4	2	2	1	2	2	3	2	3	2	4	1	4	1	3	4	2	1	1	3	2	2	3	4	3
95	4	1	3	2	1	2	1	4	2	2	4	1	1	4	1	1	2	1	2	2	2	1	3	4	2	2	2	3	2	2	3	2	3	2	4	2	2	1	1	4	2	2	3	3	2	2	3	4	1
96	4	3	3	2	1	2	3	4	2	2	4	1	1	2	3	3	1	3	2	2	4	1	3	2	4	2	2	3	2	2	1	2	1	2	4	1	2	2	3	4	2	1	1	3	2	2	3	4	3
97	4	1	3	4	4	1	3	2	1	2	4	1	2	2	3	3	1	1	1	2	4	3	1	4	4	1	4	1	4	1	1	2	1	1	2	2	4	2	1	4	1	2	1	1	1	2	3	4	3
98	2	1	3	4	2	1	3	2	1	2	2	3	2	4	1	3	2	1	1	2	2	1	1	4	4	1	4	1	2	1	1	2	1	1	2	2	4	1	1	2	1	1	3	1	1	1	1	4	1
99	2	3	1	4	4	2	3	4	2	2	2	1	1	2	1	3	2	3	2	4	2	1	3	4	4	2	4	1	2	2	1	2	1	2	4	2	4	1	1	2	2	1	3	3	2	1	3	4	1
100	2	3	3	4	4	2	1	2	2	2	2	3	1	2	3	3	1	1	2	2	2	1	3	4	2	2	4	1	4	2	3	2	1	2	4	1	4	2	3	4	2	1	1	3	2	2	3	4	1
101	2	3	3	4	2	2	1	2	2	2	4	1	2	2	3	1	1	3	2	4	4	1	3	4	4	2	4	3	2	2	3	1	3	1	4	2	4	1	3	4	2	2	1	3	2	2	3	4	1
102	2	3	3	4	2	1	3	2	1	2	4	3	2	4	3	1	1	1	1	2	4	1	3	2	2	1	4	1	4	1	1	2	3	1	4	2	4	1	1	4	1	2	3	3	1	2	3	4	1
103	2	3	1	4	2	1	1	2	1	2	4	1	2	2	1	1	1	3	1	4	4	1	1	2	2	1	4	3	4	1	1	2	3	1	2	2	4	2	3	4	1	1	3	3	1	1	1	4	1
[truncated: 671 more columns]
