# Supplementary material for: Powdery mildew resistance prediction in Barley (Hordeum Vulgare L) with emphasis on machine learning approaches
Source: Sci Rep. 2025 Jun 4;15:19556. doi: 10.1038/s41598-025-02939-3 (PMC12137941; doi:10.1038/s41598-025-02939-3)
Supplement: Supplementary file 2 — Supplementary Information 2. [file 41598_2025_2939_MOESM2_ESM.xlsx]

## Sheet: output
y
597.737
524.28
600.617
597.737
590.535
658.23
604.938
593.416
672.634
691.358
581.893
586.214
475.309
636.626
545.885
394.65
564.609
410.494
348.56
511.317
351.44
391.77
439.3
429.218
439.3
463.786
339.918
410.494
485.391
566.049
463.786
458.025
312.551
331.276
528.601
339.918
267.901
426.337
420.576
707.202
308.23
221.811
469.547
339.918
351.44
393.21
357.202
602.058
365.844
309.671
269.342
491.152
404.733
674.074
591.975
413.374
694.239
662.551
429.218
558.848
458.025
551.646
495.473
456.584
622.222
633.745
468.107
481.07
512.757
620.782
439.3
378.807
527.16
409.053
570.37
332.716
590.535
504.115
545.885
447.942
329.835
377.366
370.165
586.214
423.457
309.671
486.831
329.835
453.704
469.547
591.975
401.852
662.551
697.119
580.453
494.033
567.49
593.416
651.029
442.181
397.531
470.988
361.523
446.502
378.807
453.704
445.062
429.218
506.996
456.584
443.621
535.802
561.728
420.265
422.016
361.523
476.749
391.77
302.469
403.292
319.753
275.103
375.926
276.543
299.588
328.395
326.955
326.955
345.679
265.021
319.753
365.844
406.173
347.119
341.358
221.811
260.7
384.568
272.222
165.638
325.514
324.074
747.531
194.444
148.354
350
269.342
275.103
299.588
279.424
453.704
282.305
205.967
187.243
370.165
315.432
540.123
440.741
322.634
577.572
517.078
325.514
401.852
337.037
401.852
371.605
335.597
469.547
470.988
347.119
364.403
377.366
465.226
329.835
298.148
381.687
315.432
413.374
265.021
432.099
371.605
388.889
332.716
224.691
292.387
289.506
420.576
324.074
217.49
368.724
254.938
332.716
350
436.42
311.111
514.198
584.774
417.695
370.165
406.173
445.062
483.951
331.276
308.23
358.642
280.864
332.716
279.424
339.918
332.716
315.432
384.568
362.963
318.313
404.733
419.136
305.35
315.432
253.498
373.045
290.947
172.84
298.148
180.041
144.033
275.103
148.354
167.078
201.646
194.444
197.325
241.975
139.712
181.481
255.214
301.029
244.856
233.333
125.309
136.831
282.305
144.033
100.823
191.564
187.243
478.189
119.547
96.5021
247.737
139.712
146.914
168.519
152.675
345.679
156.996
119.547
105.144
263.58
175.72
413.374
318.313
181.481
462.346
394.65
193.004
293.827
233.333
293.827
265.021
231.893
367.284
368.724
246.296
254.938
276.543
367.284
208.848
167.078
282.305
180.041
303.909
138.272
316.872
273.663
286.626
226.132
128.189
164.198
164.198
308.23
190.123
123.868
262.14
136.831
231.893
249.177
316.872
174.28
393.21
473.868
305.35
263.58
302.469
331.276
377.366
223.251
174.28
253.498
154.115
598.177
523.888
601.254
596.025
586.362
653.286
605.158
592.126
673.245
692.757
582.185
584.159
476.32
632.256
542.369
394.584
559.154
410.272
348.155
510.854
352.155
390.155
438.054
430.287
435.184
461.784
335.295
412.159
482.478
563.158
463.45
460.275
311.158
331.285
525.398
342.26
265.628
425.184
422.158
707.84
302.158
220.184
467.185
338.474
350.184
392.158
356.188
603.51
365.321
308.176
270.18
486.255
402.624
674.125
591.474
415.177
693.125
665.116
425.82
552.393
459.751
550.841
495.6
455.329
621.751
631.284
465.298
482.151
512.78
615.182
440.582
377.126
525.184
409.187
572.185
335.15
590.28
510.584
542.238
445.281
324.155
366.254
365.98
583.154
423.65
308.42
482.625
330.254
452.187
473.258
591.272
400.154
663.185
698.185
575.174
489.224
565.284
592.24
652.326
442.188
397.186
476.251
360.127
445.478
378.154
452.136
443.297
429.455
500.284
456.145
442.485
534.175
561.752
420.122
425.62
363.217
480.544
390.164
300.257
405.155
315.254
273.215
372.362
275.822
295.754
330.184
325.28
325.484
345.291
265.841
319.255
365.074
405.754
346.147
342.184
220.174
263.284
384.187
272.154
166.25
322.784
320.486
758.784
193.174
149.23
350.184
270.159
275.186
298.177
276.124
452.14
282.125
204.184
187.126
365.855
312.254
541.26
442.025
320.184
576.125
516.25
325.185
402.13
336.574
400.185
372.184
336.159
462.5
465.051
346.252
364.158
375.159
456.264
330.484
295.458
380.158
314.184
415.158
264.362
430.287
372.184
387.154
332.178
225.184
295.129
290.758
421.751
321.785
215.128
365.185
253.184
332.585
351.284
435.298
307.484
515.184
586.127
416.785
369.854
406.558
443.184
482.158
331.751
301.25
358.178
276.154
335.285
280.454
340.258
332.52
314.268
383.264
360.584
326.855
402.125
420.284
304.265
314.185
253.141
381.474
293.265
170.284
296.284
180.157
145.158
275.484
145.237
168.458
200.231
195.362
195.784
240.185
138.477
180.245
256.287
301.254
240.765
235.284
123.841
135.284
281.486
145.115
102.159
190.418
185.236
472.187
118.751
97.265
246.785
138.484
145.158
169.25
151.239
348.185
156.287
121.287
104.126
261.172
176.148
416.784
319.741
181.158
460.284
392.154
194.28
295.287
232.17
295.158
267.32
230.444
365.184
365.255
245.281
254.254
276.786
365.158
205.184
166.582
280.585
176.159
302.478
137.298
314.744
275.129
286.484
223.854
130.785
165.184
165.158
305.172
189.25
123.587
260.254
135.159
230.184
250.174
317.159
173.287
391.284
465.184
303.84
266.71
302.15
332.188
381.785
221.284
172.392
251.478
155.285
