# Supplementary material for: Powdery mildew resistance prediction in Barley (Hordeum Vulgare L) with emphasis on machine learning approaches
Source: Sci Rep. 2025 Jun 4;15:19556. doi: 10.1038/s41598-025-02939-3 (PMC12137941; doi:10.1038/s41598-025-02939-3)
Supplement: Supplementary file 3 — Supplementary Information 3. [file 41598_2025_2939_MOESM3_ESM.xlsx]

## Sheet: Phenotypic Features
Line code	x1	x2	x3	x4	x5	x6	x7	x8	x9	x10	x11	x12	x13	x14	x15																	y
1	86.105	3.7	16.6955	1.19007	22.0264	28	7.66684	0.031536	10.3435	23.8644	0.355516	0.09905	0.0168	0.12	0.218718
2	88.535	6.38	18.0414	1.37539	27.7559	29.5625	9.14935	0.03861	11.0457	25.843	0.387382	0.126	0.020007	0.142518	0.250754
3	85.6528	3.4	16.2	1.1781	20.9086	28	7.43904	0.030456	10.3278	23.8298	0.354712	0.067	0.016767	0.12	0.217
4	86.132	3.79	16.7968	1.22724	22.3704	26.7	7.8732	0.031752	10.3838	24.0502	0.35686	0.104	0.016	0.124504	0.222698
5	87.275	4.73	17.2323	1.27228	23.2224	27.4375	8.58701	0.034128	10.658	24.2241	0.365205	0.105	0.017	0.133504	0.228506
6	81.7812	2.49	14.8028	1.04769	18.7234	24	6.0237	0.0234	10.0199	22.3913	0.336137	0.0912333	0.014	0.107662	0.204
7	85.07	3.43	16.4	1.0984	19.658	26.075	7.14458	0.029016	10.2855	23.6544	0.350843	0.0956667	0.016308	0.117363	0.214705
8	86.4245	4.17	16.8053	1.23763	22.54	26.8125	7.90844	0.032616	10.4996	24.1	0.36068	0.104	0.017739	0.129183	0.226
9	80.12	2.12	14.3681	0.94248	16.8768	24.0125	5.67284	0.022	9.64811	21.6467	0.328723	0.08155	0.013	0.103095	0.196
10	79.04	2	13.5851	0.918225	15.8123	24	5.61571	0.019	9.49211	21.2933	0.319372	0.0728	0.013	0.0983448	0.194119
11	87.575	5	17.3867	1.28867	23.6432	27.95	8.6304	0.03564	10.7041	24.5552	0.370504	0.107	0.01884	0.13477	0.231735
12	87.455	4.9	17.4379	1.28268	23.4624	27.4375	8.61131	0.034128	10.68	24.3972	0.366767	0.108	0.018495	0.134025	0.22981
13	90.605	7.68	18.3117	1.48554	31.0374	31.5	9.7238	0.042336	11.2911	26.7665	0.396552	0.135053	0.022248	0.145725	0.263066
14	83.5512	2.67	15.1853	1.08581	18.8974	24	6.45165	0.02727	10.0852	22.932	0.340885	0.09135	0.015228	0.114144	0.207
15	88.085	6	17.5901	1.3377	26.1707	30	9.04325	0.036	10.91	25.5879	0.382979	0.121	0.021	0.140805	0.237
16	94.4	10.5	18.886	1.746	37.5372	34.3	11.76	0.051624	12.1926	29.804	0.428201	0.152565	0.028269	0.16588	0.297
17	87.905	5.65	17.3394	1.31796	25.1311	28.4375	8.856	0.037152	10.8479	25.1201	0.37935	0.11445	0.019305	0.137914	0.235552
18	93.458	10.05	19.2	1.69008	36.2196	33	11.27	0.048	12.0612	29.3787	0.420597	0.150456	0.024	0.172216	0.289332
19	98.4	11.4	19.32	1.836	43.909	37.141	13.845	0.061128	12.5621	30.186	0.461125	0.161	0.0432	0.21	0.311
20	88.895	6.76	18.1678	1.38516	28.4392	29.675	9.27754	0.039312	11.0544	26.159	0.389	0.12985	0.020304	0.143487	0.252601
21	96.5	11.3	19.32	1.8	43.2706	38	13.89	0.058968	12.45	29.484	0.456037	0.1575	0.04056	0.186264	0.308
22	94.5	10.7	18.9	1.746	40.2819	35.763	11.775	0.054162	12.2012	29.9194	0.436	0.160177	0.029025	0.169975	0.298224
23	92.135	9.24	19.089	1.62256	34.2045	33.2625	10.5476	0.04644	11.74	28.2731	0.413305	0.143154	0.024948	0.16182	0.278114
24	92.3263	9.42	19.3	1.63233	34.4115	34	10.7406	0.04806	11.7933	28.431	0.416472	0.14469	0.025056	0.164792	0.280714
25	91.8	9.33	19.1363	1.63222	34.3665	33.35	10.6126	0.04725	11.7658	28.3581	0.4163	0.144007	0.024948	0.162255	0.278217
26	91.37	8.32	18.7416	1.59054	31.9194	31.7625	9.97151	0.044496	11.5187	27.35	0.403622	0.137433	0.023112	0.14993	0.268265
27	98.4	11.8	19.8	1.836	47.4753	37.492	14.295	0.07728	12.714	30.4668	0.473205	0.189	0.059328	0.204499	0.300762
28	93.305	9.96	18.9747	1.67207	36.1818	33	11.2493	0.050112	11.9652	29.3058	0.419764	0.150235	0.025	0.1711	0.285
29	90.1437	7.3	18.2491	1.45341	30.0475	30.7	9.57339	0.040608	11.2714	26.5721	0.3934	0.131367	0.021924	0.143115	0.259099
30	87.8375	5.56	17.8501	1.31408	24.8787	28.35	8.76869	0.03699	10.8387	24.8103	0.375822	0.111825	0.01917	0.136111	0.235422
31	91.3475	8.13	18.7074	1.5625	31.8069	31.9125	9.96901	0.044118	11.505	27.1188	0.402005	0.136733	0.022815	0.149785	0.266897
32	91.4375	8.41	18.7963	1.59138	32.31	31.9	9.99054	0.044712	11.5385	27.5441	0.404781	0.137433	0.023112	0.151	0.269359
33	98.3	12.2	19.6	1.974	57.9172	41	16.845	0.132	13.972	31.9176	0.488832	0.235	0.083538	0.21	0.319284
34	99.2	12	19.5	1.905	53.6361	38.532	15.27	0.086	13.7151	30.7125	0.478	0.210996	0.080325	0.204365	0.304038
35	88.13	6.2	17.7957	1.35492	27.2939	29.275	9.11048	0.03834	10.9828	25.673	0.385333	0.1253	0.019791	0.141252	0.250207
36	97.5	11.6	19.32	1.838	43.9508	39	13.875	0.06291	12.5853	30.2445	0.461962	0.168	0.0546	0.20321	0.302369
37	109.4	14.6	21.14	2.178	68.5608	43.485	18.075	0.1584	15.1056	34.02	0.582	0.345	0.15191	0.260032	0.342
38	92.495	9.8	19.3	1.64724	35.1801	35	10.7716	0.049032	11.8345	28.8411	0.416594	0.145259	0.026	0.168	0.283
39	92.5	9.6	18.8246	1.64955	35.46	32	10.908	0.049896	11.8854	28.8563	0.417992	0.156	0.025704	0.170375	0.28345
40	67.36	1.7	12.4106	0.68166	10.0665	18.15	4.86819	0.0144	8.9964	17.856	0.293455	0.05495	0.01164	0.08526	0.176349
41	101.2	12.5	20.3	2.068	61.3179	42	17.775	0.14535	14.6318	32.3622	0.504878	0.261	0.115	0.192	0.325
42	106.3	12.6	22.4	2.322	70.7933	48	20.604	0.175032	16.4396	37.485	0.594551	0.429216	0.194407	0.302	0.326
43	91.1	7.95	18.5227	1.53972	31.5756	31.6125	9.84555	0.042984	11.4738	26.9609	0.397655	0.135	0.0226368	0.148	0.264845
44	98.4	11.7	19.46	1.839	46.4056	37.362	14.055	0.06972	12.5948	30.3615	0.465159	0.18645	0.061	0.206325	0.308
45	96.4	11.6	19.32	1.821	43.3447	37.505	13.875	0.0594	12.4636	30.186	0.462	0.161467	0.0414	0.198532	0.31
46	94.4	10.8	19.028	1.764	39.7974	35.685	11.775	0.054	12.1982	29.8526	0.429253	0.153	0.03	0.167895	0.296446
47	96.2	11.2	19.4	1.8	43.1186	36.855	13.755	0.05805	12.3679	29.484	0.454859	0.157	0.03864	0.18096	0.305
48	85.1375	3.3	16.2099	1.14503	20.318	26.1125	7.39034	0.02997	10.2902	23.7038	0.353882	0.0963667	0.016308	0.119423	0.217282
49	95.5	11	19.18	1.764	42.2522	37	12.315	0.056538	12.3074	29.2266	0.448546	0.166	0.031455	0.178425	0.301507
50	101.2	11.8	20.3	2.012	60.6848	41	17.325	0.14174	14.5834	32.3505	0.493118	0.265	0.109408	0.20748	0.321079
51	103.8	12.5	20.72	2.124	65.0937	43	18.04	0.149	15.008	33.0408	0.537	0.316928	0.118664	0.197388	0.326
52	89.831	7.12	18.4	1.43829	29.4875	30.6	9.44966	0.040014	11.1669	26.487	0.391072	0.1309	0.021375	0.141593	0.257594
53	93.5	9.7	19.2	1.71	36.4248	33	11.67	0.051192	12.1402	29.5853	0.421997	0.152728	0.027594	0.161265	0.294
54	79.385	2.03	13.9766	0.93366	16.6414	23.3125	5.64935	0.0204	9.51229	21.5064	0.324	0.0812	0.013635	0.104	0.194
55	86.87	4.26	16.8633	1.24393	22.6304	27.0625	8.15625	0.032616	10.5424	24.1587	0.36	0.103425	0.01782	0.130435	0.227331
56	93.7	10	18.8	1.67181	36.0306	32	11.0692	0.049896	11.9322	29.16	0.418373	0.148073	0.025812	0.170636	0.285
57	76.7338	2	13.1936	0.902475	12.8412	24	5.53839	0.0168	9.36429	20.3175	0.299806	0.0595	0.0117	0.09802	0.190791
58	80.45	2.21	14.3055	0.980164	17.7556	24.5375	5.77932	0.022248	9.72465	21.42	0.331326	0.0821333	0.013	0.103965	0.203
59	92.36	9.51	19.359	1.64426	34.7022	33.475	10.7504	0.048222	11.7965	28.7499	0.417	0.14469	0.024	0.166895	0.281534
60	87.95	5.74	17.3895	1.32174	26.061	28.7625	8.94	0.037422	10.8679	25.4208	0.379496	0.1155	0.018	0.13857	0.235781
61	91.64	8.7	18.8979	1.59138	32.67	31.95	10.1914	0.04482	11.5619	27.7628	0.405185	0.144427	0.02322	0.150292	0.271685
62	87.9875	5.83	17.4447	1.33308	26.0788	30	8.97035	0.0372	10.9389	25.515	0.380862	0.119467	0.019656	0.139911	0.236988
63	89.075	6.7	18.1566	1.40836	29.2451	31	9.35	0.039582	11.1106	26.2804	0.390654	0.13055	0.022	0.140723	0.253
64	91.82	8.79	18.848	1.59379	32.7627	34	10.1959	0.0452736	11.5645	27.7992	0.405804	0.14504	0.023625	0.150684	0.273737
65	83.63	3.1	15.6	1.09588	19.2782	24	6.69141	0.0276	10.1862	23.0265	0.347905	0.092	0.015	0.116653	0.208
66	83.5625	2.76	15.4	1.09336	18.9521	24	6.68736	0.027648	10.1363	22.9477	0.345057	0.09135	0.01572	0.115362	0.208409
67	91.325	8.04	18.7025	1.554	31.7475	31.85	9.94538	0.046	11.4849	27.0338	0.401754	0.1365	0.022653	0.18	0.26676
68	90.155	7.39	18.2628	1.47504	30.1018	32	9.66107	0.041256	11.2903	26.5781	0.394	0.13405	0.022059	0.143985	0.261664
69	88.8837	6.47	18.1467	1.37623	27.9186	29.6875	9.17388	0.039312	11.0497	25.8491	0.388595	0.129267	0.020115	0.143115	0.250754
70	84.8	3.34	15.8	1.09834	18.975	25	7.04531	0.028728	10.2053	23.2848	0.349375	0.092	0.014	0.11716	0.210366
71	92.09	9.15	19.05	1.61385	33.9723	32.9375	10.5401	0.046224	11.6542	28.2184	0.409	0.140026	0.024732	0.160805	0.275789
72	94.6	10.8	19.17	1.746	40.9222	35.802	11.94	0.055188	12.2087	30.1077	0.437926	0.154	0.03	0.170781	0.299182
73	88.31	6.29	17.9913	1.36416	27.7436	29.4625	9.13275	0.03861	10.9863	25.7337	0.385662	0.125533	0.019	0.141401	0.250618
74	92.7	9.9	19.2	1.71	36.2448	33.9	11.475	0.05076	12.1241	29.5245	0.421587	0.151	0.027081	0.175392	0.291384
75	87.788	5.38	17.6418	1.30549	24.7112	28.1375	8.70306	0.035964	10.8289	24.7253	0.37177	0.108967	0.019008	0.135292	0.232
76	98.5	11.8	19.8	1.795	50.824	39	14.475	0.092	12.715	30.6979	0.480383	0.205	0.076	0.203	0.303534
77	87.1737	4.44	17.227	1.26284	23.1032	27.3125	8.51513	0.033696	10.6096	24.215	0.362619	0.105117	0.017982	0.132759	0.228244
78	89.03	6.85	17.9586	1.39839	28.8645	31	9.33996	0.03942	11.108	26.1833	0.38993	0.130025	0.020628	0.140244	0.253183
79	88.085	6.01	17.7907	1.34095	27.0708	29.0625	9.06398	0.037	10.9478	25.6061	0.383661	0.12285	0.018	0.141029	0.237901
80	91.955	9.1	19	1.60492	32.7771	32.3875	10.3467	0.04563	11.5838	28.03	0.406211	0.140817	0.024111	0.15341	0.274
81	99.2	12.3	19.88	1.935	57.9744	40	16.575	0.1092	13.8285	31.4925	0.484964	0.229476	0.084	0.206	0.315
82	95.1	10.8	19.17	1.764	41.3535	35.906	12.255	0.055782	12.2335	29.0248	0.441895	0.159559	0.0297	0.173	0.299968
83	95.1	11	19.04	1.764	41.5606	35.919	12.255	0.05616	12.2979	29.0511	0.444105	0.163	0.030564	0.174096	0.300413
84	87.5	4.91	17.2773	1.28415	23.5144	27.65	8.61273	0.035478	10.7006	24.458	0.367716	0.107683	0.02	0.1341	0.230202
85	91.4	9.8	18.7734	1.64745	35.199	35	10.7801	0.049464	11.79	28.8441	0.416	0.141	0.025	0.165	0.282834
86	98.6	11.8	19.74	1.998	60.3658	41	16.95	0.133488	14.0973	32.1224	0.489884	0.251	0.10361	0.204	0.319536
87	89.885	7.21	18.172	1.44606	30.0038	30.7	9.46688	0.04023	11.187	26.5478	0.392886	0.131075	0.021492	0.14239	0.258689
88	99.5	12.3	19.88	1.922	56.9976	40	15.3	0.093	13.7392	31.0343	0.483363	0.22945	0.0801	0.213	0.311388
89	91.91	9.1	19.2	1.59847	32.7726	33	10.24	0.045306	11.5732	27.7992	0.405	0.140117	0.02403	0.153	0.273
90	90.9538	8.1	18.6	1.53736	31.2147	33	9.83421	0.044	11.3929	26.98	0.399	0.135	0.02241	0.14645	0.263956
91	86.96	4.35	17.0162	1.25884	22.9552	27.2625	8.33103	0.033534	10.5768	23.9963	0.362	0.10395	0.01782	0.131641	0.227809
92	93.7	9.8	20.1	1.728	36.9432	35	11.7	0.051408	12.1505	29.6703	0.425458	0.154945	0.027891	0.163475	0.295
93	80.915	2.4	14.4202	1.02732	17.925	26	5.9983	0.023112	9.82551	21.735	0.335506	0.0880833	0.013	0.106285	0.204
94	75.71	1.66	12.8021	0.83853	10.0685	22.525	5.53189	0.0156	9.256	19.8349	0.29716	0.05565	0.011	0.095178	0.190758
95	87.6012	5.09	17.4335	1.29412	23.768	28.0125	8.69333	0.03564	10.795	24.628	0.371015	0.1085	0.018	0.134994	0.231996
96	89.5025	7.03	18.4	1.42506	29.4341	30.475	9.4446	0.04128	11.1384	26.4262	0.390872	0.13055	0.02133	0.141375	0.28
97	87.815	5.47	17.7512	1.31061	24.8317	28.225	8.71694	0.036072	10.8354	24.8012	0.374062	0.110133	0.019062	0.135963	0.234509
98	86.393	3.88	16.9569	1.23018	22.4208	28	7.87377	0.032454	10.4691	24.192	0.360538	0.105	0.018	0.127544	0.224134
99	82.235	2.58	15.0705	1.04895	18.8526	25.2375	6.33744	0.023814	10.053	22.4343	0.340234	0.09135	0.014985	0.109098	0.205
100	92.045	9.06	18.8421	1.61259	33.0084	32.45	10.53	0.046224	11.6015	28.107	0.407143	0.141867	0.024516	0.154077	0.275652
101	94.1	10.4	18.6	1.728	37.1952	34.2625	11.715	0.051624	12.1665	29.7554	0.428	0.151	0.02808	0.16432	0.295214
102	90.65	7.77	18.3654	1.52922	31.1256	31.5	9.78642	0.0432	11.3392	26.8272	0.396947	0.13545	0.022356	0.14616	0.263716
103	95.9	11.1	19.18	1.8	42.5885	36.517	13.215	0.057816	12.3319	29.27	0.451054	0.153562	0.031536	0.18	0.304
1	84.9	3.4	17.7	1.24146	21.507	27	8.0325	0.0306	11.0542	25.2	0.447181	0.10572	0.018	0.1236	0.2223
2	89.25	6	18.4	1.39836	28.2528	30.03	9.5	0.0436	11.68	27.075	0.462899	0.121	0.02238	0.14715	0.24675
3	84.1	3.3	17.625	1.24016	20.6658	26.94	7.97344	0.03012	11.0537	25.08	0.445407	0.1056	0.01736	0.12105	0.22218
4	84.96	3.706	17.73	1.25	22.1106	27.2	8.136	0.03096	11.0813	25.35	0.447259	0.10674	0.0178	0.1251	0.2235
5	87.2	4.2	18.02	1.2987	23.3886	27	8.4375	0.0356	11.2912	25.54	0.453313	0.10938	0.02	0.133493	0.23304
6	80.625	2.506	17.37	1.15815	18.618	25.2	6.96703	0.0222	10.6063	23.16	0.439124	0.0987	0.0144	0.11259	0.2019
7	83.325	3.226	17.56	1.23723	19.977	26.6	7.455	0.0288	10.95	25.05	0.445239	0.1047	0.01585	0.117765	0.2133
8	86.75	3.946	17.8	1.27404	22.9002	27.3	8.26	0.0317	11.184	25.425	0.44881	0.10716	0.01875	0.128205	0.2268
9	79.925	2.146	17.1	1.0592	16.5972	24.15	5.73125	0.019	10.3412	22.7	0.433024	0.0927	0.01365	0.10737	0.198
10	79.14	1.906	17	1.03194	15.9732	21	5.23687	0.017	10.2915	22.38	0.427568	0.0819	0.011	0.104	0.1986
11	87.9	4.786	18.125	1.3235	24.024	28	8.59248	0.0387	11.345	25.76	0.455573	0.11308	0.0204	0.136395	0.2361
12	87.35	4.3	18.05	1.3025	23.5332	29	8.47969	0.036	11.3	25.68	0.453725	0.11135	0.0201	0.13437	0.2334
13	91.125	7.426	18.69	1.497	31.1112	31.35	9.855	0.0464	12.1	28.2	0.468573	0.13254	0.0238	0.15075	0.2552
14	81.03	2.746	17.4	1.18576	18.7794	25.25	7.15122	0.0255	10.6833	24.1	0.442283	0.0996	0.01506	0.113243	0.2049
15	88.875	5.746	18.42	1.36995	26.4042	29.6	9.22444	0.041	11.52	26.8	0.462	0.11884	0.0219	0.14274	0.24336
16	95.2	10.8	19.3	1.74	38.745	35	12.4	0.057	13.0729	30.4	0.481917	0.1573	0.03145	0.18375	0.29625
17	88.5	5.4	18.38	1.35	25.7154	28.95	8.85938	0.0405	11.4675	26.28	0.458966	0.11695	0.0207	0.13914	0.24132
18	94.26	10.186	19.29	1.7127	37.9692	34.95	12.13	0.0548	12.9065	30.075	0.481296	0.15244	0.0294	0.18036	0.28964
19	99.5	12.2	19.7	1.83	45.315	37	14.42	0.0663	13.25	31.35	0.500919	0.16756	0.043575	0.203	0.31295
20	89.925	6.4	18.54	1.40984	28.7442	30.15	9.555	0.0438	11.7	27.39	0.463965	0.1218	0.0228	0.14778	0.2474
21	97.5	11.8	19.7	1.82	44.443	37.32	14.75	0.0636	13.2	31.18	0.500491	0.16536	0.040075	0.196	0.31071
22	95.8	11	19.4	1.75	40.365	36.3	12.78	0.0588	13.12	30.6	0.484724	0.16024	0.03162	0.187725	0.3008
23	92.9	9.106	19.02	1.6182	36.1296	32	11.1793	0.048	12.6337	29.475	0.477307	0.14745	0.02628	0.165825	0.278
24	92.97	9.2	19.05	1.6328	36.2526	33.36	11.322	0.05128	12.6437	29.56	0.477551	0.147	0.02704	0.16776	0.281
25	92.925	9.226	19.04	1.63104	36.1524	32	11.3	0.048	12.35	29.52	0.477343	0.1476	0.0266	0.167175	0.281
26	91.675	8.146	18.855	1.5464	33.981	31.95	10.6392	0.0476	12.1813	28.65	0.473215	0.1402	0.0246	0.15444	0.2666
27	99.3	12.5	19.8	1.9	47.785	38.4	15.28	0.067	13.46	31.575	0.502781	0.192617	0.0647792	0.207877	0.316
28	94	10.066	19.17	1.70976	37.6566	34.2	12.12	0.053	12.79	30	0.479979	0.15225	0.0285	0.18018	0.28876
29	90.9	7.186	18.675	1.48389	30.3354	30	9.805	0.0456	11.9563	28	0.465496	0.13092	0.02376	0.14967	0.2541
30	88.48	5.266	18.36	1.3488	25.6656	28.8	8.84812	0.0402	11.45	26.235	0.458808	0.11676	0.02	0.139095	0.2408
31	90	8	18.84	1.54145	33.1746	31	10.6312	0.0476	12.1775	28.6	0.472219	0.135	0.0242	0.153225	0.2649
32	91.68	8.266	18.9	1.5644	34.4988	31	10.6664	0.0477	12.2505	28.825	0.474148	0.1411	0.02505	0.154	0.267
33	105.4	13	21	2.12	58.401	40.26	16.92	0.1274	13.99	32.875	0.511854	0.2394	0.086275	0.21474	0.32988
34	99.2	12.7	19.8	1.94	53.98	39.65	16.18	0.0870333	13.7687	31.89	0.50757	0.220412	0.0714	0.21	0.31908
35	89.1	5.986	18.42	1.39305	27.4578	29	9.26328	0.0414	11.655	26.9	0.46186	0.118	0.0222	0.145	0.24456
36	98.6	12.2	19.8	1.88	45.75	38.31	14.93	0.0669	13.2507	31.395	0.501986	0.16782	0.0546	0.205	0.3141
37	108.2	13.6	21	2.26	70.824	43.56	18.34	0.150617	15.3521	34.95	0.596907	0.368375	0.1771	0.26289	0.3665
38	93.375	9.586	19.1	1.6871	36.357	33.84	11.59	0.05184	12.7312	29.655	0.477827	0.14955	0.02766	0.172462	0.2865
39	93.825	9.826	19.14	1.69455	37.3296	33.9	11.7432	0.05256	12.75	29.775	0.47809	0.1506	0.0284	0.175	0.28764
40	73.8	1.546	16.35	0.9177	11.4762	18	4.8	0.014	10.0196	19.62	0.382959	0.07275	0.0101	0.09981	0.1795
41	104.2	13.4	21.2	2.18	63.615	41.76	17.89	0.1428	14.4187	33.96	0.522459	0.267429	0.130375	0.217237	0.34185
42	110.2	13.7	22.5	2.46	71.768	48	21.65	0.17255	16.05	36.765	0.607368	0.445925	0.2107	0.304	0.384
43	90	7.786	18.825	1.53628	31.704	31.8	10.1841	0.04712	12.155	28.4	0.470245	0.13508	0.0239	0.151762	0.26424
44	99.5	12.3	19.6	1.89	47.022	38.35	15.12	0.0671	13.2542	31.5	0.502739	0.186	0.0637	0.207	0.315
45	97.8	11.9	19.7	1.83	44.442	36	14.83	0.0642	13.2177	31.2	0.500521	0.1661	0.0435167	0.201	0.31188
46	95.7	10.9	19.4	1.74	39.645	35.85	12.68	0.0588	13.0762	30.45	0.482694	0.1578	0.0315	0.18477	0.30039
47	97.5	11.7	19.6	1.81	44.44	35	13.81	0.06324	13.1533	30.9	0.497326	0.1647	0.03372	0.195705	0.31062
48	83.66	3.346	17.625	1.23804	20.5092	26.65	7.71375	0.027	11.0062	25.05	0.44526	0.1056	0.0164	0.1206	0.21405
49	96.8	11.5	19.6	1.78	43.158	36.8	13.61	0.0629	13.133	30.8	0.492164	0.162	0.03345	0.19251	0.3085
50	106.2	13.2	21	2.16	61.575	41.34	17.24	0.139	14.075	33.9	0.522047	0.265912	0.115558	0.21591	0.3358
51	104.52	13.5	21	2.18	65.129	41.84	18.11	0.144958	14.4542	34.35	0.55327	0.30737	0.134167	0.21861	0.34248
52	90.69	6.7	18.625	1.44515	29.949	30.7	9.73519	0.04476	11.775	27.66	0.465056	0.1286	0.0234	0.1494	0.2492
53	94.5	10.3	19.3	1.72	38.354	35.04	12.18	0.054	12.9553	30.14	0.481481	0.15335	0.0294	0.18081	0.2926
54	79.68	2.026	17.1	1.0389	16.032	23	5.292	0.018	10.3063	22.65	0.429923	0.08964	0.01275	0.10647	0.197
55	86.835	4.066	17.925	1.275	22.9644	27.45	8.2992	0.0328	11.1875	25.5	0.450024	0.107	0.01935	0.12825	0.22812
56	93.84	9.946	19.15	2.69	37.3662	34.05	11.7562	0.0532	12.7747	29.835	0.47865	0.15069	0.02848	0.178178	0.28815
57	78.675	1.786	16.5	0.99896	12.2592	20	4.95844	0.016	10.11	22.35	0.410687	0.08	0.01	0.10494	0.19805
58	80.01	2.266	17.22	1.09275	17.2404	24.24	5.94	0.02	10.44	22.965	0.434607	0.0928	0.014	0.107604	0.20112
59	93	9.466	19.08	1.6469	36.2898	33.48	11.3822	0.0516	12.7027	29.6	0.477782	0.148	0.0274	0.169	0.2851
60	88.68	5.506	18.39	1.3548	25.7328	29.22	9.0675	0.0408	11.45	26.42	0.460117	0.11768	0.021	0.1422	0.24195
61	92.32	8.386	18.9	1.5808	34.53	31	10.6745	0.0477	12.2663	28.92	0.474429	0.14442	0.02515	0.15462	0.2678
62	88.8	5.626	18.4	1.35936	26.2698	29.36	9.07125	0.04088	11.549	26.7	0.46012	0.11835	0.0219	0.142	0.242
63	90.1	6.5	18.575	1.42316	29.4564	30.3	9.59062	0.042	11.752	27.475	0.464049	0.12696	0.0232	0.14877	0.24864
64	92.325	8.4	18.9	1.59732	34.5414	32	10.793	0.0478	12.3133	29.25	0.474569	0.14496	0.0255	0.15921	0.2707
65	83.1	2.986	17.5	1.2207	19.1652	26	7.2558	0.028	10.8432	24.8	0.443356	0.102	0.01548	0.115065	0.2129
66	81.975	2.866	17.45	1.1997	18.8832	25.65	7.1685	0.0273	10.764	24.525	0.442291	0.10101	0.0153	0.11421	0.2112
67	89.7	7.906	18.825	1.54092	31.9464	31.8	10.4034	0.04752	12.1742	28.59	0.472167	0.13545	0.02392	0.152	0.26476
68	91.08	7.306	18.68	1.4948	30.3636	31.3	9.82547	0.0456	11.99	28.18	0.466947	0.13125	0.021	0.149783	0.25515
69	89.4	6.1	18.52	1.4085	28.4574	29	9.516	0.042	11.6813	27.38	0.463405	0.12115	0.0228	0.14769	0.2469
70	83.3	3.106	17.55	1.2258	19.5756	26.1	7.37	0.028	10.8983	24.94	0.444114	0.10245	0.01555	0.115	0.213
71	92.805	8.9	18.99	1.6041	35.3622	33.18	11.1776	0.0501	12.5	29.4	0.477064	0.14718	0.0261	0.165	0.277
72	96.3	11.2	19.4	1.76	40.415	36.4	13.25	0.0588	13.1225	30.606	0.485424	0.16048	0.0318	0.18882	0.30108
73	89.175	6.106	18.5	1.39614	27.4668	30	9.47574	0.0414	11.6632	27	0.462879	0.12035	0.02232	0.146903	0.24552
74	94.4	10.3	19.3	1.71	38.174	35.01	12.16	0.05532	12.945	30.1	0.481357	0.15252	0.0294	0.18081	0.2908
75	88.3	5.026	18.2	1.3329	24.951	28.4	8.71894	0.039	11.4417	26.1	0.45614	0.11445	0.0205	0.1377	0.23876
76	99.7	12.6	19.8	1.93	51.236	38.92	15.4	0.065	13.505	31.89	0.50326	0.218983	0.0702625	0.209	0.31855
77	87.18	4.1	17.98	1.2942	23.01	27.6	8.4105	0.03512	11.2723	25.525	0.453168	0.10875	0.0195	0.132997	0.23085
78	90.075	6.4	18.555	1.41582	29.247	30.3	9.555	0.04392	11.727	27.42	0.464036	0.12525	0.0228	0.14832	0.2475
79	89	5.866	18.42	1.37988	27.3354	29.76	9.2491	0.04136	11.6375	26.85	0.461469	0.12	0.02196	0.14535	0.2434
80	92.54	8.746	18.975	1.60108	34.7304	32	10.8163	0.0484	12.361	29.3	0.47507	0.144	0.0258	0.16176	0.2732
81	103.2	12.9	21	2.12	58.142	38	16.42	0.1092	13.8975	32.34	0.510253	0.235579	0.0753083	0.21339	0.32625
82	96.5	11.3	19.4	1.77	42.236	36.6	13.41	0.05946	13.1246	30.675	0.485962	0.161	0.0321	0.18972	0.30324
83	96.8	11.4	19.5	1.78	42.854	36.76	13.42	0.06228	13.125	30.75	0.490606	0.161	0.03315	0.19044	0.30612
84	87.65	4.666	18.06	1.31085	23.5506	27.9	8.55168	0.037	11.325	25.725	0.455543	0.11202	0.02025	0.136282	0.23564
85	93.6	9.6	19.125	1.68785	36.7842	33.84	11.7	0.0522	12.7375	29.74	0.477915	0.14976	0.0277	0.17253	0.2872
86	104.6	13	21	2.14	59.004	41.04	17.18	0.129558	14.0495	32.875	0.512945	0.2429	0.10745	0.21528	0.33
87	90.88	7	18.65	1.4531	30.2106	30.76	9.7603	0.0456	11.8187	27.66	0.465394	0.1306	0.02356	0.1494	0.2534
88	101.2	12.8	19.8	2.1	57.639	39	16.38	0.08715	13.7733	32.15	0.506	0.229862	0.0724792	0.212918	0.32325
89	92.445	8.5	18.9	1.60044	34.5642	31	10.8054	0.046	12.3575	29.275	0.475067	0.143	0.02564	0.15939	0.27156
90	91.32	7.6	18.72	1.51952	31.4442	31.75	10.172	0.046	12.1163	28.35	0.469173	0.13476	0.02385	0.15174	0.25734
91	86.96	4	17.97	1.29235	22.9998	26	8.38337	0.033	11.25	25.524	0.452802	0.10812	0.0195	0.12888	0.22854
92	94.5	10.5	19.3	1.73	38.512	35.13	12.21	0.0568	12.9825	30.15	0.481556	0.15444	0.02973	0.181643	0.2936
93	80.075	2.386	17.25	1.14675	17.7474	24.6	6.004	0.02	10.5875	23.12	0.439031	0.0966	0.01425	0.11	0.2
94	77.175	1.666	16.5	0.9462	11.6436	19.5	4.9	0.016	10.0687	21.225	0.398926	0.078	0.01	0.101	0.17991
95	87.9	4.906	18.15	1.33196	24.258	28	8.62875	0.039	11.4375	25.8	0.453	0.11352	0.02044	0.13662	0.23805
96	90.675	6.6	18.625	1.42372	29.7846	30.6	9.729	0.04464	11.7575	27.495	0.464405	0.12768	0.02325	0.1491	0.2487
97	88.35	5.146	18.22	1.3416	25.4214	28.72	8.802	0.038	11.442	26.1	0.458094	0.11605	0.019	0.138983	0.2394
98	86.74	3.826	17.775	1.2695	22.5516	27.3	8.1725	0.0311	11.1625	25.4	0.447585	0.1068	0.0186	0.125573	0.22425
99	80.67	2.626	17.38	1.1631	18.7284	25.2	7.11281	0.0231	10.6775	23.76	0.441869	0.09927	0.01472	0.112	0.2046
100	92.625	8.8	18.975	1.6023	35.2608	32	11.1186	0.0492	12.4393	29.35	0.476201	0.145	0.02592	0.16182	0.27376
101	94.5	10.6	19.3	1.74	38.625	35	12.24	0.05696	13.0282	30.375	0.481703	0.15715	0.03114	0.18342	0.2952
102	91.125	7.546	18.7	1.5099	31.287	31.45	10.1178	0.0465	12.1075	28.29	0.468918	0.1329	0.02385	0.1512	0.2571
103	97.8	11.6	19.6	1.81	43.267	36.96	13.75	0.063	13.1367	30.82	0.492345	0.16449	0.03355	0.19314	0.30852
1	53.4771	2.09125	8.3125	0.44208	10.9566	12	3.89375	0.01575	6.81042	15.9833	0.254054	0.050787	0.009	0.051	0.120802
2	56.0875	3.63125	9.2	0.534263	13.6575	15.05	4.75781	0.0231	7.24792	17.0625	0.270435	0.062532	0.0120167	0.06055	0.134
3	53.4333	2.02125	8.25417	0.43425	10.9179	12.95	3.80625	0.01505	6.74625	15.9833	0.251982	0.049815	0.00851667	0.05145	0.117652
4	53.9	2.16125	8.34167	0.444217	11.0328	13.1833	3.99656	0.01575	6.74	16.0125	0.255658	0.051435	0.00875	0.051975	0.12117
5	54.95	2.58125	8.6625	0.46476	11.9271	13.65	4.11206	0.017	7	16.1875	0.261304	0.054837	0.00945	0.055475	0.127417
6	51.5083	1.46125	7.6125	0.37089	8.364	11	3.43437	0.0112	6.48885	14.9625	0.248744	0.045441	0.007	0.043575	0.109935
7	52.7917	1.88125	8.10833	0.425048	10.2207	14	3.71437	0.012	6.73507	15.925	0.250996	0.047	0.00805	0.04935	0.115552
8	53.9583	2.30125	8.4875	0.45387	11.2524	13.3	4.06547	0.014	6.86292	16.1	0.258462	0.051	0.008925	0.05355	0.122
9	50.575	1.25125	7.175	0.34596	7.9854	11.73	3.28125	0.009	6.31944	14.7	0.244145	0.044226	0.006475	0.0357	0.106155
10	49.6417	1.11125	6.5625	0.33543	7.62854	11.375	2.835	0.008	6.27375	14.35	0.238283	0.042	0.005	0.0336	0.103005
11	55.3	2.79125	8.80833	0.47727	12.3254	14	4.36975	0.018025	7.00972	16.25	0.26278	0.0567	0.009975	0.05565	0.12873
12	53.9	2.65125	8.70625	0.47097	12.0666	13.7667	4.15188	0.0176167	7	16.1875	0.262466	0.054945	0.0098	0.055475	0.127995
13	57.2833	4.33125	9.77083	0.57069	14.4939	15.9833	5.50922	0.025725	7.26	17.4825	0.275769	0.064962	0.014	0.068425	0.14049
14	52.0042	1.60125	7.875	0.38484	9.2709	12.1917	3.54375	0.01295	6.54062	15.6625	0.248885	0.047952	0.007525	0.047775	0.112298
15	55.7083	3.35125	9.1875	0.52155	13.1346	14	4.62	0.0205333	7.14292	16.7562	0.265	0.06	0.011725	0.059325	0.13482
16	59	6.2	11.2	0.69	19.874	17.8	7.01	0.0357	7.95667	18.7833	0.290432	0.074817	0.021875	0.0873833	0.1587
17	55.65	3.14125	8.8	0.49536	12.9156	14.4667	4.54271	0.0198333	7.13125	16.5375	0.264762	0.057	0.012	0.058275	0.131197
18	58.7708	5.94125	10.9375	0.66501	18.7788	17.4417	6.78854	0.03465	7.8575	18.4917	0.287671	0.071	0.01855	0.0817833	0.155138
19	60.6	7	12.1	0.76	23.441	19.72	8.01	0.0511	8.19	19.3667	0.296359	0.079947	0.027	0.14728	0.169759
20	56.6125	3.77125	9.42083	0.549225	13.8555	15.1667	4.93377	0.02345	7.28437	17.0625	0.26	0.063504	0.0124833	0.0610167	0.135923
21	59.8	6.9	11.8	0.75	22.512	19.36	7.74	0.049	8.1584	19.075	0.295019	0.0789345	0.026	0.137725	0.16569
22	59.1	6.5	11.4	0.71	19.925	17.93	7.2	0.03878	8.02812	18.8125	0.290939	0.073	0.02345	0.09415	0.159232
23	58.1	5.31125	10.4562	0.636435	15.9366	17.1967	6.3	0.0305667	7.63437	18.1271	0.282	0.068769	0.0161	0.074	0.149415
24	58.1292	5.45125	10.5875	0.64359	16.6614	17.2375	6.34375	0.0312667	7.6684	18.2	0.283544	0.069093	0.01715	0.075775	0.149
25	58.1	5.38125	10.4	0.63936	16.5486	17.2083	6.30146	0.0305667	7.65503	18.1417	0.280917	0.067	0.0168	0.0756	0.150412
26	57.8958	4.7	10.1062	0.59679	15.0615	16	5.85521	0.028	7.50556	17.7771	0.276791	0.0669263	0.014	0.071225	0.142
27	63.2	7.3	12.4	0.78	24.035	20.41	8.28	0.05292	8.31979	19.5417	0.299419	0.080595	0.028	0.151	0.1719
28	58.7417	5.87125	10.9083	0.6606	18.7188	17.4417	6.783	0.0343	7.81667	18.4917	0.287643	0.071604	0.01785	0.08155	0.154193
29	57.1667	4.19125	9.74167	0.56349	14.3118	15.575	5.355	0.0249667	7.33931	17.4417	0.274356	0.0646988	0.0133583	0.06475	0.138442
30	55.65	3.07125	9.0125	0.49194	12.7998	14.385	4.44609	0.0196	7.11667	16.45	0.264278	0.0580568	0.01	0.056	0.13041
31	57.75	4.68125	10.0625	0.59481	14.8107	18	5.8275	0.026775	7.48514	17.7625	0.276471	0.066825	0.014	0.0708167	0.142275
32	57.925	4.82125	10.1208	0.5985	15.168	16.7417	5.88685	0.028	7.54031	17.9083	0.277686	0.0669263	0.014	0.0721	0.142905
33	63.2	7.6	13	0.81	27.145	21.56	9.32	0.05436	8.68437	20.3438	0.311111	0.084	0.02943	0.157	0.17787
34	62.8	7.4	12.6	0.79	24.526	20.82	9.62	0.05328	8.37083	19.8625	0.30035	0.082944	0.02871	0.15	0.172725
35	55.2	3.49125	9.275	0.52515	13.2707	14.9333	4.65937	0.0219333	7.11	16.9167	0.267911	0.061803	0.0119	0.0599667	0.135292
36	60.2	7.2	12.2	0.76	23.564	19.77	8.04	0.052	8.23	19.42	0.297745	0.0800685	0.026	0.1485	0.170835
37	63.7	7.9	13.6	0.98	30.265	23.45	11.62	0.059	9.18264	21.4375	0.331361	0.124011	0.03636	0.18196	0.199552
38	58.3187	5.59125	10.675	0.64854	17.6037	17.325	6.61172	0.03185	7	18.2875	0.284424	0.069498	0.0174125	0.0775833	0.15078
39	58.625	5.73125	10.8062	0.65448	18.2469	17.3833	6.65438	0.0322	7.75833	18.4333	0.286079	0.0700245	0.017675	0.0799458	0.153195
40	40.25	0.90125	5.5125	0.310842	7.3864	10.9667	1.92937	0.005	6.08125	13.3	0.211538	0.038475	0.00455	0.03045	0.0965475
41	65.8	7.8	13.2	0.892	28.425	23.47	10.93	0.05742	9.10963	20.6937	0.315838	0.092016	0.032445	0.17406	0.183015
42	67.3	8.4	13.8	1.01	35.012	24.56	11.92	0.05886	10.3444	21.9625	0.340228	0.12528	0.0414	0.18668	0.21483
43	57.4	4.54125	9.975	0.58653	14.6058	16.1875	5.69217	0.0266	7.45646	17.5875	0.276089	0.065853	0.0147	0.069475	0.141855
44	62.3	7.2	12.4	0.77	23.931	19.77	8.11	0.052	8.21	19.425	0.29911	0.080433	0.02718	0.1503	0.171045
45	61.2	6.9	11.9	0.75	22.325	19.42	7.84	0.0497	8.17396	19.1042	0.29603	0.078	0.026	0.14388	0.165821
46	59.1	6.4	11.3	0.7	19.902	17.91	7.04	0.0371	8	18.795	0.290876	0.074925	0.0231	0.093975	0.15876
47	59.6	6.8	11.8	0.74	21.965	18.96	7.71	0.0469	8.12778	19.0312	0.293796	0.078003	0.02646	0.1148	0.164824
48	53.3458	1.95125	8.1375	0.42885	10.725	12	3.76833	0.01505	6.58	15.9833	0.251475	0.0492885	0.008225	0.0504	0.115762
49	59.5	6.7	11.6	0.723	20.714	18.7	7.62	0.04375	8.08573	18.9875	0.292653	0.075	0.025	0.0993417	0.1631
50	60.2	7.7	13.2	0.846	28.241	22.35	10.86	0.05724	8.85694	20.5625	0.313141	0.0914625	0.03096	0.16542	0.17829
51	63.2	7.9	13.5	0.86	30.235	23.45	11.48	0.05742	9.13403	20.7375	0.319742	0.093474	0.03384	0.17541	0.189315
52	56.7875	4.05125	9.65417	0.562095	14.2332	15.3417	5.145	0.0240333	7.33542	17.4125	0.273675	0.063909	0.0132417	0.063175	0.138232
53	58.7	6.1	11.1	0.67	19.227	17.58	6.84	0.035	7.93333	18.5792	0.289796	0.073386	0.0202125	0.08295	0.15687
54	50.0208	1.18125	6.9125	0.343192	7.923	11.55	3.21562	0.008	6.29271	14.7	0.242	0.043605	0.0065	0.03465	0.103084
55	54.1771	2.37125	8.53125	0.459045	11.3568	13.3	4.06875	0.01645	6.86632	16.1438	0.258479	0.0529942	0.008	0.053725	0.12348
56	58.6833	5.80125	10.8208	0.66042	18.4896	17.4125	6.72656	0.0336	7.80208	18.4625	0.287587	0.071523	0.01785	0.0809667	0.153641
57	49.2625	1.04125	6.2125	0.32265	7.596	11.2	2.75625	0.007	6.14542	14.175	0.224963	0.0405972	0.005	0.031	0.101955
58	50.8375	1.32125	7.2625	0.34929	8.2581	11.725	3.4125	0.0091	6.35688	14.707	0.246404	0.0442665	0.006825	0.0413875	0.106628
59	58.1583	5.52125	10.6312	0.64782	17.4786	17.2667	6.53917	0.0315	7.7	18.2583	0.284411	0.068	0.017325	0.0758042	0.150465
60	55.65	3.21125	9.05625	0.498173	12.9663	14.4667	4.54781	0.01995	7.11	16.625	0.265455	0.0596363	0.0116	0.058625	0.133875
61	57.925	4.89125	10.2083	0.61578	15.1914	16.8	5.91	0.0285833	7.5425	17.9375	0.277	0.067	0.015	0.071	0.142905
62	55.7083	3.28125	9.07083	0.518737	12.9678	14.7	4.62	0.02	7.14073	16.7417	0.265774	0.059	0.01155	0.0592083	0.133954
63	56.7	3.91125	9.5375	0.55	14.13	15.225	5.0715	0.0238	7.30406	17.2375	0.272553	0.062	0.012	0.0620667	0.136552
64	57.925	4.96125	10.3	0.62181	15.3645	16.8875	5.97	0.0294	7.5425	17.9375	0.278306	0.068121	0.014	0.0730333	0.142
65	52.4125	1.5	7.9625	0.40293	9.6732	12.4833	3.60938	0.012	6.63542	15.7675	0.249501	0.047952	0.007875	0.0483	0.114502
66	52.3542	1.9	7.90417	0.386303	9.6198	12.25	3.60937	0.011	6.59167	15.75	0.249364	0.047952	0.007875	0.04795	0.113
67	57.4	4.61125	10.0042	0.59445	14.7561	16.275	5.80125	0.0267167	7.48125	17.675	0.27619	0.0667	0.014	0.0701167	0.141907
68	57.2833	4.26125	9.75625	0.56439	14.4324	15.925	5.39962	0.02555	7.35365	17.4417	0.274891	0.0648	0.0133875	0.0671067	0.140437
69	56.35	3.70125	9.40625	0.54081	13.7118	15.05	4.88323	0.0231	7.2625	17.0625	0.27045	0.062856	0.012075	0.0609	0.135712
70	52.675	1.81125	8.02083	0.4185	9.8544	12.6	3.64	0.012	6.69375	15.8375	0.25	0.0480634	0.007	0.0490583	0.115185
71	58.1	5.3	10.4417	0.63243	15.7686	17.15	6.2685	0.03045	7.60083	18.1125	0.279544	0.068688	0.0161	0.074	0.14637
72	59.2	6.4	11.4	0.712	20.04	17.93	7.3	0.040425	8.03	18.8125	0.284	0.0752895	0.0245	0.0945875	0.160493
73	56.0875	3.56125	9.2	0.53064	13.6308	14.9917	4.75781	0.0224	7.2224	16.975	0.26901	0.062208	0.0120167	0.060375	0.13545
74	58.8	6	10.7	0.66	19.054	17.5	6.81	0.034825	7.92847	18.55	0.287839	0.072	0.01939	0.0828333	0.155138
75	55.4458	2.93125	8.88125	0.485257	12.3528	14.175	4.37719	0.01855	7.10208	16.3771	0.263643	0.057186	0.01	0.0571667	0.129465
76	62.5	7.4	12.6	0.78	24.361	20.65	8.46	0.053	8.32708	19.6	0.300252	0.08	0.02862	0.15124	0.172279
77	54.425	2.51125	8.60417	0.4635	11.9106	13.3	4.095	0.018	6.99125	16.1875	0.260414	0.054513	0.008	0.05425	0.12726
78	56.7	3.84125	9.50833	0.557865	14.0562	15.1667	5.05312	0.02345	7.29944	17.1792	0.271809	0.063666	0.012775	0.0616	0.13629
79	55.825	3.42125	9.23125	0.5238	13.2243	14	4.62656	0.0212333	7.175	16.8875	0.266455	0.0615195	0.01	0.0599083	0.134978
80	58.0125	5.1	10.3542	0.625905	15.6666	17.0333	6.15234	0.03	7.56875	18.025	0.278868	0.068607	0.01575	0.07385	0.144795
81	62.3	4.3	12.8	0.79	26.864	21.23	9.22	0.05406	8.5295	20.1833	0.310705	0.082	0.028	0.159	0.175613
82	59.3	6.5	11.5	0.72	20.365	18.25	7.35	0.0415333	8.05365	18.8417	0.292196	0.076707	0.024	0.0949083	0.16
83	58.3	6.4	11.6	0.72	20.514	18.5	7.59	0.0417667	8.06	18.9	0.292413	0.076869	0.0254	0.0988167	0.16
84	55.125	2.72125	8.6	0.47358	12.2331	13.9417	4.36734	0.01785	7	16.275	0.2625	0.0552623	0.0098	0.055475	0.1281
85	58.345	5.66125	10.7042	0.65196	18.1629	17.38	6.63688	0.03	7.71	18.4333	0.284907	0.069579	0.0175	0.07847	0.15183
86	64.3	7.6	13.1	0.812	27.822	22.05	9.97	0.05634	8.81319	20.3875	0.311927	0.08667	0.0308025	0.16098	0.178238
87	56.9625	4.12125	9.5	0.56247	14.3055	15.4875	5.29375	0.02415	7.33687	17.4125	0.274142	0.064152	0.0133	0.063875	0.137
88	62.3	7.5	12.8	0.79	24.756	21.17	8.65	0.05328	8.41896	19.95	0.3097	0.083754	0.02871	0.15357	0.175297
89	57.9687	5.03125	10.2812	0.624398	15.6567	16.9167	6.09583	0.0294	7.54687	17.9667	0.278838	0.068445	0.0156333	0.07385	0.143
90	57.4	4.47125	9.93125	0.58032	14.5548	16.1	5.56937	0.0264833	7.43264	17.5583	0.276	0.065691	0.0142917	0.0693	0.14154
91	54.425	2.44125	8.575	0.46	11.6517	13.3	4.095	0.017	6.93875	16.1583	0.260059	0.053865	0.008	0.054075	0.124267
92	58.9	6.1	11.1	0.68	19.274	17.65	6.91	0.033	7.94792	18.6375	0.289834	0.073791	0.0207667	0.0833583	0.157101
93	51.1	1.39125	7.40833	0.36099	8.3259	11.9	3.4125	0.0105	6.39625	14.9333	0.248619	0.0449145	0.00688333	0.0432833	0.1071
94	46.9583	0.97125	5.7	0.31938	7.3794	11.025	2.42156	0.005	6.12062	14.1167	0.218681	0.0405	0.00525	0.0305667	0.0968625
95	55.3583	2.86125	8.7	0.482	12.3441	14.035	4.37719	0.01855	7.05542	16.3333	0.263554	0.0568822	0.01015	0.056175	0.129307
96	56.7292	3.98125	9.58125	0.562072	14.1438	15.2833	5.082	0.0240333	7.31792	17.3979	0.273256	0.0637065	0.013125	0.062475	0.136552
97	55.475	3.00125	8.9	0.489525	12.7152	14.2917	4.40344	0.0189	7.11083	16.4062	0.264081	0.057429	0.01	0.0576917	0.130284
98	53.9	2.23125	8.37083	0.44973	11.223	13.3	4.01	0.014	6.84687	16.0417	0.257914	0.05	0.00880833	0.0525	0.121
99	51.975	1.3	7.64167	0.37512	8.5929	11	3.4475	0.01295	6.49542	15.3125	0.248771	0.04779	0.007525	0.0464625	0.110565
100	58.1	5.17125	10.5	0.63234	15.696	17.15	6.174	0.02975	7.57604	18.1125	0.27905	0.068688	0.015925	0.073	0.144
101	58.9	6.2	11.1	0.683	19.554	17.67	6.98	0.0357	7.95521	18.6375	0.286	0.074763	0.0208833	0.0860417	0.157973
102	57.3417	4.40125	9.8875	0.579015	14.5134	16.0417	5.51687	0.02625	7.41927	17.5292	0.275792	0.065205	0.014	0.06895	0.141435
103	59.5	6.8	11.7	0.73	21.203	18.9	7.65	0.0462	8.08646	18.9875	0.293194	0.0779058	0.0263	0.10745	0.164325
1	86.3	3.6	16.766	1.17	21.8971	26	7.68	0.0312	10.309	23.912	0.356	0.0996	0.01692	0.121275	0.21808
2	87.4	6.4	17.94	1.332	27.762	29.5625	9.15	0.0384	11.037	25.866	0.384	0.1262	0.02004	0.143785	0.25
3	85.9	3.5	16.102	1.17	20.8276	26	7.425	0.03	10.309	23.842	0.355	0.0992	0.01704	0.120834	0.217935
4	86.1	3.8	16.932	1.224	22.2	26	7.89	0.0312	10.348	24.094	0.358	0.1024	0.016	0.124415	0.221
5	87.2	4.6	17.22	1.26	23.2342	27.4375	8.565	0.0336	10.673	24.246	0.365	0.1056	0.01812	0.132908	0.22823
6	81.6	2.2	14.79	1.044	18.7201	24	6.045	0.0252	10.036	22.344	0.336	0.0924	0.01464	0.10817	0.205755
7	85.3	3.4	16.49	1.098	19.9941	26.075	7.125	0.03	10.296	23.688	0.352	0.0956	0.0162	0.116145	0.21489
8	85.9	4.2	16.892	1.242	22.4934	26.8125	7.89	0.0324	10.517	24.0856	0.362	0.1034	0.01788	0.128885	0.226925
9	80.2	2.2	14.268	0.936	16.8854	23	5.684	0.0228	9.633	21.6775	0.329	0.0816	0.01392	0.10324	0.197925
10	69.2	1.7	13.746	0.918	15.7338	22	5.597	0.018	9.516	21.2425	0.321	0.0736	0.01176	0.099615	0.19401
11	87.3	5	17.334	1.296	23.5402	27.95	8.61	0.034	10.712	24.543	0.371	0.1082	0.01884	0.134696	0.231565
12	88.1	4.6	17.384	1.26	23.4006	26	8.58	0.0348	10.686	24.4215	0.367	0.1078	0.01848	0.133653	0.229825
13	90.5	7.7	18.392	1.398	31.0338	31.5	9.72	0.042	11.297	26.7705	0.396	0.132	0.0222	0.144	0.262
14	83.5	2.7	15.13	1.08	18.937	24	6.45	0.027	10.088	22.918	0.34	0.0912	0.014	0.113	0.207
15	88.3	5.9	17.628	1.332	26.1154	28	9.06	0.0384	10.933	25.596	0.383	0.1202	0.01968	0.140805	0.237945
16	94.4	10.6	18.886	1.746	37.485	34.3	11.745	0.0516	12.194	29.8485	0.428	0.15228	0.02844	0.16614	0.296096
17	88.2	5.8	17.316	1.296	25.1409	27	8.865	0.0372	10.816	25.1505	0.378	0.1146	0.01944	0.137974	0.23548
18	93.5	10	19.14	1.674	36.2851	33	11.28	0.0504	12.051	29.38	0.421	0.15067	0.027	0.172115	0.28956
19	98.2	11.6	19.18	1.836	43.9166	37.141	13.815	0.0612	12.545	30.173	0.46	0.1615	0.04332	0.20956	0.308
20	88	6.8	17.94	1.368	28.4112	29	9.285	0.0396	11.076	26.1225	0.389	0.1298	0.0204	0.143338	0.251
21	96.3	11.3	19.32	1.8	43.2079	36.868	13.875	0.0576	12.441	29.471	0.455	0.14432	0.04056	0.18668	0.3069
22	94.5	10.7	19.028	1.728	40.2933	35.763	11.775	0.0528	12.194	29.916	0.437	0.16038	0.028	0.17004	0.298376
23	92.2	9.2	19.2	1.62	34.5865	33.2625	10.56	0.0456	11.752	28.269	0.414	0.143325	0.02484	0.161965	0.278312
24	92.3	9.5	19.35	1.62	34.4134	34	10.755	0.04752	11.791	28.431	0.416	0.14469	0.02508	0.164	0.280592
25	92.3	9.3	19.2	1.62	34.5312	34	10.635	0.045	11.778	28.377	0.417	0.14391	0.02484	0.1624	0.278312
26	91.2	8.3	18.696	1.566	31.9725	31.7625	9.975	0.0444	11.531	27.3105	0.405	0.1374	0.02304	0.14993	0.268128
27	99.6	11.8	19.74	1.836	47.2435	37.492	14.28	0.075	12.688	30.51	0.475	0.18755	0.05936	0.20449	0.30086
28	93.4	10	18.995	1.674	36.2592	33.7875	11.235	0.0516	11.973	29.322	0.421	0.15048	0.0258	0.171245	0.286672
29	90.2	7.3	18.24	1.458	30.0458	30.7	9.585	0.0408	11.232	26.568	0.394	0.1314	0.02208	0.143115	0.258
30	87.9	5.6	17.82	1.314	24.9569	27	8.79	0.036	10.829	24.8535	0.376	0.1116	0.01932	0.136484	0.235335
31	91.4	8.2	18.696	1.566	31.8312	31.9125	9.96	0.0432	11.492	27.1215	0.403	0.1368	0.021	0.149785	0.266608
32	91.5	8.4	18.696	1.584	32.337	31.9	9.975	0.0432	11.531	27.5535	0.406	0.1374	0.021	0.150075	0.269496
33	97.8	12.2	19.74	1.998	57.9744	39.546	16.875	0.1332	13.93	31.902	0.487	0.23075	0.08358	0.20889	0.31962
34	100.1	12	19.88	1.908	53.4702	38.532	15.27	0.0897	13.72	30.745	0.482	0.2106	0.082	0.2045	0.30422
35	88.2	6.2	17.784	1.35	27.2422	29.275	9.105	0.0372	10.972	25.6905	0.387	0.1252	0.0198	0.141252	0.25004
36	96.5	11.6	19.18	1.862	43.9432	38	13.86	0.0624	12.571	30.251	0.462	0.1674	0.0546	0.20316	0.301
37	108.4	14.5	21.28	2.178	68.5818	45	18.06	0.158	15.134	33.93	0.596	0.346	0.1529	0.25443	0.33
38	92.5	9.6	19.35	1.637	35.0737	33.675	10.785	0.0504	11.83	28.836	0.416	0.145275	0.02544	0.167475	0.281
39	93.3	9.8	18.85	1.635	35.6114	35	10.89	0.048	11.882	28.8765	0.418	0.146	0.02568	0.17023	0.283632
40	69.3	1.6	12.876	0.684	10.0257	18.15	4.8865	0.012	8.98	17.94	0.294	0.0548	0.01152	0.085115	0.17661
41	101.2	12.5	20.44	2.088	62.2125	40	17.76	0.1463	14.63	32.344	0.505	0.26404	0.11726	0.19425	0.324
42	105.3	12.5	22.4	2.304	69.8379	48	20.621	0.176	16.425	37.45	0.596	0.42891	0.194925	0.3029	0.32292
43	91	7.9	18.544	1.548	31.6116	33	9.825	0.0432	11.479	26.946	0.398	0.1362	0.02268	0.148	0.264784
44	97.4	11.2	19.46	1.758	45.987	38	14.025	0.0696	12.584	30.355	0.465	0.178	0.05888	0.20652	0.305
45	95.7	11.5	19.32	1.818	43.4606	37.505	13.875	0.06	11.97	30.173	0.46	0.1614	0.0414	0.19864	0.30975
46	94.4	10.7	19.028	1.764	39.8126	35.685	11.79	0.0528	12.181	29.9025	0.428	0.15336	0.02892	0.16809	0.296552
47	97.1	11.2	19.18	1.8	43.0996	36.855	13.725	0.056	12.35	29.445	0.454	0.14322	0.03864	0.18096	0.30585
48	85.3	3.4	16.102	1.17	20.2177	26.1125	7.395	0.03	10.296	23.73	0.353	0.0966	0.01656	0.119952	0.21721
49	95.5	11	19.18	1.759	42.2465	36.452	12.315	0.054	12.298	29.224	0.448	0.16456	0.03144	0.17836	0.30172
50	103.2	12.2	20.3	2.016	61.2722	41	17.325	0.145	14.574	32.318	0.495	0.26236	0.10998	0.20768	0.32088
51	105.4	12.5	21	2.124	63.4494	43	17.94	0.1482	15.008	33.033	0.539	0.31792	0.1183	0.19747	0.323
52	89.4	7.2	18.172	1.44	29.4945	30.6	9.435	0.0396	11.167	26.487	0.392	0.1308	0.022	0.141375	0.257184
53	93.5	10.2	19.43	1.728	36.389	35	11.64	0.048	12.13	29.5785	0.423	0.15276	0.0276	0.16185	0.292752
54	79.3	2	14.094	0.936	16.598	23	5.5825	0.0216	9.568	21.5615	0.329	0.0812	0.0138	0.10266	0.195025
55	86.8	4.3	16.892	1.242	22.6006	25	8.13	0.0324	10.53	24.0992	0.362	0.1034	0.01776	0.130524	0.226
56	93.3	9.9	18.995	1.674	36.0873	33.6875	11.07	0.0504	11.934	29.1735	0.419	0.14801	0.02568	0.170375	0.286216
57	76.7	1.9	13.224	0.918	12.8585	22	5.5245	0.018	9.399	20.34	0.301	0.0592	0.011	0.09773	0.189
58	80.5	2.2	14.28	0.99	17.578	24.5375	5.771	0.0216	9.685	21.504	0.332	0.0824	0.01428	0.10411	0.20387
59	92.4	9.6	19.3	1.634	34.7137	33.475	10.77	0.0492	11.791	28.7685	0.417	0.14469	0.024	0.16704	0.281352
60	87.8	5.7	17.16	1.314	26.0508	28	8.94	0.0372	10.881	25.407	0.379	0.1156	0.01944	0.138719	0.235625
61	91.5	8.6	18.848	1.584	32.697	33	10.17	0.042	11.544	27.7695	0.405	0.141	0.021	0.151	0.271776
62	87.3	5.8	17.472	1.321	26.0882	30	8.955	0.0372	10.933	25.542	0.382	0.117	0.01968	0.139315	0.23751
63	89.8	7	18.172	1.404	29.2512	30.475	9.42	0.0396	11.128	26.2575	0.391	0.1304	0.02112	0.14094	0.253
64	91.5	8.6	18.5	1.534	33.2244	33	10.2	0.0432	11.25	27.65	0.402	0.142	0.023	0.15	0.273904
65	83.6	3.2	15.98	1.098	19.1913	25.525	6.69	0.0276	10.218	23.03	0.349	0.091	0.01596	0.11658	0.20909
66	83.5	2.5	15.81	1.098	18.925	25.4375	6.675	0.0276	10.166	22.932	0.346	0.09	0.01572	0.115275	0.20822
67	91.2	8	18.544	1.548	31.7484	33	9.945	0.0432	11.479	27.054	0.402	0.1366	0.02268	0.149	0.266608
68	90.1	7.3	18.24	1.476	30.1095	32	9.675	0.039	11.271	26.568	0.394	0.131	0.0222	0.143985	0.261
69	88.3	6.5	18.096	1.332	27.9387	29.6875	9.195	0.0396	11.05	25.866	0.388	0.129	0.02016	0.143338	0.25156
70	84.7	3.3	16.32	1.098	19.5685	25.925	7.065	0.0288	10.257	23.31	0.349	0.093	0.01608	0.117015	0.21141
71	92.3	9.2	18.9	1.62	33.7585	32.9375	10.545	0.0456	11.661	28.2285	0.409	0.140205	0.02472	0.160805	0.27588
72	94.6	10.8	19.028	1.746	40.9222	35	11.925	0.054	12.194	30.1185	0.438	0.15504	0.02952	0.17095	0.298
73	87.9	6.1	17.784	1.35	27.622	29.4625	9.135	0.0384	10.972	25.72	0.387	0.1256	0.0198	0.145424	0.250344
74	93.4	10.1	18.995	1.71	36.2466	33	11.46	0.0504	12.129	29.5245	0.421	0.15295	0.02724	0.17603	0.291232
75	87.8	5.4	17.658	1.296	24.2335	28.1375	8.715	0.0336	10.816	24.732	0.374	0.1092	0.01884	0.135292	0.233015
76	98.5	11.8	19.88	1.854	50.824	37	14.46	0.0897	12.688	30.693	0.481	0.20916	0.07875	0.20438	0.3031
77	87.8	4.3	17.22	1.278	23.1286	27.3125	8.445	0.0324	10.647	24.2325	0.363	0.1052	0.016	0.132759	0.22823
78	89.3	6.9	17.8	1.386	28.8697	31	9.345	0.0396	11.089	26.2035	0.391	0.1302	0.019	0.14007	0.252
79	88.3	6	17.784	1.332	26.9955	29.0625	9.075	0.0384	10.959	25.596	0.384	0.123	0.01968	0.140954	0.23809
80	91.2	9	19	1.602	32.8985	32.3875	10.35	0.0456	11.583	28.0125	0.405	0.141	0.02424	0.15341	0.275424
81	98.6	12.1	19.6	1.944	57.9128	38.662	16.575	0.1095	13.79	31.499	0.484	0.22555	0.08274	0.20718	0.31542
82	94.8	10.8	19.17	1.746	41.3364	35	12.255	0.0552	12.246	29.016	0.442	0.15946	0.02964	0.17186	0.299
83	94.9	11	19.04	1.764	41.5606	35	12.255	0.0552	12.285	29.055	0.442	0.16184	0.03048	0.17355	0.300504
84	87.2	4.6	17.334	1.278	23.4109	29	8.595	0.0336	10.725	24.4755	0.361	0.107	0.017	0.133	0.229
85	92.8	9.7	18.705	1.634	35.0712	33.6125	10.815	0.046	11.869	28.8225	0.418	0.14326	0.02556	0.168925	0.283024
86	98.2	12.2	19.74	1.998	59.675	39.546	16.965	0.135	14.098	32.123	0.491	0.2485	0.10322	0.20464	0.31934
87	90.1	7.2	18.326	1.458	30.1245	30.7	9.48	0.039	11.206	26.5275	0.392	0.131	0.0216	0.14239	0.28
88	100.1	12	19.88	1.926	57.1208	38.675	15.345	0.0936	13.734	31.018	0.482	0.22932	0.081	0.211	0.3115
89	91.8	9	19	1.602	32.832	32.25	10.23	0.0444	11.583	27.756	0.406	0.1402	0.023	0.152105	0.274208
90	91.2	7.8	17.9	1.548	31.2516	33	9.825	0.042	11.23	26.89	0.397	0.1358	0.021	0.14645	0.264176
91	87.2	4.3	17.056	1.26	22.9325	27.2625	8.31	0.0324	10.48	24.0165	0.362	0.1044	0.01776	0.131865	0.228085
92	93.7	10.3	19.14	1.728	37.0332	34.2625	11.71	0.051	12.155	29.6325	0.426	0.155	0.02784	0.163	0.294
93	80.8	2.3	14.45	1.026	16.6077	24.725	6.015	0.0228	9.867	21.784	0.335	0.089	0.01452	0.106575	0.20532
94	75.6	1.7	13.05	0.864	10.0289	22	5.5245	0.0156	9.295	19.875	0.298	0.0556	0.0114	0.094685	0.19053
95	87.5	5.1	17.496	1.296	23.7305	27	8.715	0.034	10.803	24.6375	0.371	0.1084	0.01896	0.134845	0.232145
96	89.4	7	18.326	1.44	29.4612	30.475	9.48	0.0396	11.12	26.4195	0.389	0.129	0.02148	0.141375	0.257184
97	87.2	5.4	17.82	1.296	24.7919	27	8.73	0.0348	10.816	24.975	0.375	0.1104	0.01908	0.136335	0.23461
98	85.8	3.8	16.932	1.242	22.6486	26	7.815	0.0312	10.504	24.206	0.361	0.102	0.01716	0.126	0.224025
99	82.3	2.7	15.13	1.062	18.841	24	6.375	0.0252	10.062	22.442	0.341	0.091	0.01512	0.10962	0.205
100	91.5	9.2	18.75	1.602	33.0451	32.45	10.53	0.0468	11.583	28.107	0.408	0.1418	0.0246	0.154425	0.27588
101	94.1	10.4	18.744	1.728	37.1466	34.2625	11.7	0.0516	12.168	29.73	0.426	0.15228	0.02808	0.16445	0.294
102	91.3	7.5	18.2	1.53	31.1112	31.5	9.78	0.0408	11.375	26.75	0.396	0.134	0.021	0.14616	0.263
103	95.9	11.1	19.32	1.8	42.5923	36.517	13.23	0.056	12.298	29.289	0.452	0.15375	0.0318	0.17862	0.302784
1	84.6	3.6	17.7	1.24	21.5135	27.01	8.03	0.031	11.05	25.21	0.446	0.1056	0.0178	0.1235	0.2226
2	89.3	6.3	18.4	1.4	28.217	30.05	9.51	0.044	11.68	27.06	0.464	0.1211	0.0225	0.1472	0.2465
3	83.9	3.4	17.6	1.24	20.684	26.65	7.98	0.031	11.04	25.09	0.445	0.1057	0.0175	0.1212	0.2223
4	84.9	3.4	17.7	1.25	22.185	27.21	8.14	0.031	11.08	25.36	0.445	0.1065	0.017	0.1251	0.2235
5	87.2	4.4	18	1.3	23.1585	27.62	8.45	0.036	11.28	25.54	0.453	0.1093	0.0201	0.1336	0.2331
6	80.5	2.5	17.5	1.16	18.6287	25.32	6.96	0.023	10.62	23.18	0.439	0.0986	0.0143	0.1127	0.2
7	82.9	3.2	17.5	1.25	19.8754	26	7.45	0.029	10.95	25.03	0.443	0.1048	0.0159	0.1188	0.2135
8	86.7	3.8	17.8	1.28	22.924	27.32	8.27	0.033	11.19	25.42	0.449	0.1075	0.0187	0.1281	0.2269
9	79.9	2.1	17.1	1.06	16.545	24.16	5.72	0.019	10.34	22.75	0.436	0.0926	0.0137	0.1072	0.202
10	82.3	1.8	17.1	1.03	15.8574	21.93	5.23	0.017	10.28	22.38	0.429	0.0821	0.0115	0.1052	0.1985
11	86.8	4.8	18	1.31	24.0465	28.03	8.54	0.038	11.35	25.74	0.456	0.1136	0.0204	0.1365	0.2362
12	87.6	4.5	18	1.3	23.5585	27	8.41	0.038	11.3	25.69	0.454	0.1115	0.0202	0.1345	0.2335
13	91.1	7.4	18.6	1.5	31.124	30	9.85	0.045	12.1	28.21	0.468	0.1325	0.0237	0.1507	0.2553
14	82.6	2.8	17.4	1.18	18.7156	25.21	7.16	0.026	10.63	24.12	0.442	0.0997	0.0152	0.1136	0.203
15	88.9	5.8	18.3	1.38	26.409	29	9.21	0.041	11.6	26.82	0.462	0.1187	0.0219	0.1428	0.2434
16	94.7	10.8	19.3	1.74	38.743	35.71	12.41	0.056	13.06	30.41	0.482	0.1572	0.0314	0.1837	0.2963
17	88.4	5.5	18.3	1.35	25.3718	28	8.87	0.041	11.46	26.28	0.458	0.1169	0.0207	0.1392	0.238
18	94.3	10.4	19.2	1.71	37.9241	34	12.14	0.052	12.94	30.08	0.482	0.1524	0.0294	0.1804	0.2897
19	100.2	12.2	19.7	1.83	45.317	37	14.45	0.066	13.24	31.35	0.501	0.1674	0.043	0.2041	0.3131
20	89.8	6.5	18.5	1.41	28.843	29	9.52	0.045	11.71	27.39	0.463	0.1218	0.0229	0.1477	0.2473
21	97.5	11.8	19.7	1.82	44.442	37.32	14.77	0.064	13.21	31.19	0.501	0.1652	0.0402	0.1968	0.3108
22	96.8	11	19.4	1.75	40.326	36.32	12.74	0.058	13.11	30.62	0.485	0.1608	0.0315	0.1876	0.3007
23	91.2	9.1	19	1.613	36.1284	33.25	11.18	0.05	12.63	29.48	0.476	0.1475	0.0263	0.165	0.2786
24	93.1	9.3	19.1	1.63	36.254	33.39	11.31	0.05	12.65	29.56	0.478	0.1487	0.0271	0.1677	0.2819
25	92.8	9.2	19	1.63	36.1584	33.26	11.32	0.05	12.64	29.53	0.477	0.1475	0.0265	0.1673	0.2819
26	91.6	8.2	18.9	1.55	33.857	31.92	10.64	0.048	12.19	28.67	0.473	0.139	0.0246	0.1546	0.2665
27	98.7	12.5	19.8	1.91	47.812	38.41	15.26	0.067	13.44	31.59	0.503	0.1926	0.0647	0.2078	0.3175
28	94.1	10.2	19.2	1.71	37.685	33	12.12	0.054	12.78	30.02	0.48	0.1523	0.0286	0.1803	0.2876
29	90.9	7.2	18.6	1.48	30.347	31.21	9.82	0.046	11.96	28.01	0.465	0.1308	0.0238	0.1496	0.253
30	88.4	5.3	18.2	1.35	25.6275	28	8.85	0.041	11.43	26.25	0.458	0.1169	0.0206	0.1392	0.237
31	91.6	8.1	18.9	1.54	33.124	31.86	10.62	0.048	12.17	28.61	0.47	0.1355	0.0243	0.1532	0.2648
32	90	8.4	18.9	1.56	34.412	31	10.65	0.047	12.24	28.83	0.474	0.1412	0.0251	0.1546	0.268
33	105.3	13	21	2.12	58.326	39	16.92	0.126	13.98	32.86	0.511	0.2394	0.0865	0.2148	0.3211
34	99.8	12.6	19.8	1.94	53.942	38	16.17	0.087	13.76	31.85	0.508	0.218	0.0715	0.2108	0.3192
35	89.2	6	18.4	1.39	27.436	29.87	9.25	0.041	11.65	26.92	0.462	0.1202	0.0223	0.14658	0.2448
36	97	12.3	19.8	1.88	45.761	37	14.92	0.067	13.24	31.42	0.502	0.1672	0.0544	0.2058	0.3142
37	108.5	13.6	21	2.26	70.325	43.25	18.35	0.152	15.38	34.96	0.598	0.3654	0.1772	0.262	0.3654
38	91	9.4	19.1	1.69	36.3287	33.75	11.58	0.051	12.72	29.65	0.478	0.1496	0.0276	0.1725	0.2864
39	93.8	9.8	19	1.69	37.325	33.98	11.74	0.052	12.74	29.74	0.478	0.149	0.0284	0.1771	0.2875
40	73.6	1.5	16.5	0.93	11.4684	19.35	4.82	0.015	10.03	19.63	0.384	0.042	0.0101	0.0997	0.17795
41	105.3	13.4	21.1	2.17	63.254	41.72	17.88	0.143	14.45	33.94	0.522	0.2674	0.1305	0.2171	0.3418
42	109.3	13.6	22.1	2.45	71.265	48.62	21.65	0.174	16.07	36.75	0.605	0.4475	0.2106	0.3062	0.3841
43	91.4	7.9	18.8	1.54	31.7598	31.75	10.18	0.047	12.16	28.45	0.47	0.1351	0.0239	0.1518	0.2643
44	98.4	12.3	19.6	1.89	47.124	38.36	15.13	0.067	13.25	31.51	0.502	0.1872	0.0638	0.2071	0.3165
45	97.8	11.9	19.7	1.83	44.512	36	14.81	0.065	13.22	31.22	0.501	0.1662	0.0435	0.2005	0.312
46	96.3	10.9	19.3	1.74	39.658	35.84	12.65	0.059	13.08	30.44	0.482	0.1576	0.0316	0.1849	0.3004
47	96	11.8	19.6	1.81	44.411	37.15	13.82	0.063	13.16	30.92	0.497	0.1645	0.0336	0.1956	0.3105
48	83.6	3.3	17.5	1.24	20.5124	26.56	7.72	0.029	11.02	25.04	0.4445	0.1054	0.0165	0.1205	0.2142
49	96.8	11.5	19.6	1.79	43.126	36.82	13.62	0.063	13.12	30.81	0.491	0.1638	0.0334	0.1925	0.3082
50	107.2	13.2	21	2.15	61.25	41.35	17.25	0.141	14.08	33.85	0.522	0.2653	0.1157	0.2158	0.3359
51	105.2	13.5	21	2.18	65.127	41.85	18.12	0.146	14.56	34.33	0.554	0.3073	0.1345	0.2187	0.3426
52	91.1	6.9	18.6	1.45	29.897	30.71	9.73	0.045	11.79	27.65	0.465	0.1287	0.0235	0.1495	0.248
53	93.4	10.2	19.3	1.72	38.326	34	12.16	0.055	12.96	30.13	0.481	0.1534	0.0294	0.1807	0.2925
54	78.6	2	17.1	1.05	16.1584	23.92	5.26	0.018	10.32	22.66	0.433	0.0896	0.0128	0.1066	0.1985
55	86.7	4.2	17.9	1.28	22.975	27.42	8.31	0.034	11.21	25.51	0.452	0.1078	0.0194	0.1282	0.2282
56	93.8	9.9	19.1	1.69	37.365	33	11.75	0.052	12.77	29.86	0.479	0.1508	0.0284	0.1782	0.2885
57	78.6	1.6	16.5	1.01	12.3857	21.05	4.93	0.016	10.12	22.35	0.412	0.0806	0.011	0.1047	0.1982
58	79.6	2	17.3	1.09	17.2694	24.23	5.92	0.02	10.45	22.96	0.436	0.0926	0.0141	0.1076	0.2012
59	93.1	9.5	19	1.65	36.214	33.45	11.39	0.051	12.71	29.61	0.478	0.1491	0.0275	0.1698	0.2851
60	88.8	5.5	18.4	1.35	25.684	29.21	9.06	0.04	11.54	26.72	0.459	0.1178	0.0218	0.1425	0.239
61	91	8.4	18.9	1.58	34.562	32.25	10.68	0.047	12.29	28.94	0.474	0.1444	0.0251	0.158	0.2678
62	88.7	5.7	18.4	1.36	26.247	29.35	9.04	0.041	11.58	26.75	0.461	0.1185	0.0218	0.1425	0.2421
63	90.1	6.7	18.5	1.42	29.512	30.28	9.52	0.046	11.74	27.46	0.464	0.1271	0.0233	0.1488	0.2485
64	92.3	8.5	19	1.6	34.5289	32.61	10.78	0.047	12.32	29.25	0.475	0.1451	0.0254	0.1593	0.2708
65	83.1	3	17.4	1.22	19.1257	26.11	7.25	0.028	10.85	24.86	0.443	0.1021	0.0154	0.1152	0.2128
66	81.9	3	17.4	1.21	18.7584	25	7.18	0.027	10.72	24.52	0.442	0.1011	0.0152	0.1145	0.2113
67	91.5	7.9	18.8	1.54	31.854	31	10.4	0.045	12.17	28.59	0.471	0.133	0.0239	0.1532	0.2647
68	91.2	7.3	18.7	1.49	30.341	30	9.83	0.046	11.98	28.19	0.468	0.1314	0.0238	0.1498	0.2551
69	89.4	6.4	18.4	1.4	28.423	29	9.53	0.044	11.68	27.36	0.462	0.1212	0.0227	0.1476	0.2468
70	82	3.1	17.5	1.23	19.5874	26.23	7.38	0.028	10.89	24.96	0.444	0.1023	0.0156	0.1172	0.2133
71	92.7	9.1	19	1.6	35.2694	32	11.18	0.049	12.51	29.41	0.475	0.1472	0.0261	0.1635	0.2781
72	96.3	11.2	19.4	1.76	40.425	36.45	13.26	0.059	13.11	30.62	0.485	0.1604	0.0318	0.188	0.3012
73	89.2	6.1	18.5	1.4	27.658	30.01	9.47	0.042	11.65	27.01	0.463	0.1205	0.0223	0.1468	0.2452
74	94.4	10.3	19.3	1.71	38.176	34	12.15	0.054	12.95	30.11	0.481	0.1524	0.0294	0.1809	0.2907
75	87.6	5.1	18.1	1.32	24.9785	28.42	8.75	0.039	11.42	26.12	0.456	0.1152	0.0205	0.1387	0.2387
76	98.6	12.6	19.7	1.93	51.287	38	15.41	0.068	13.51	31.89	0.503	0.2192	0.0704	0.2104	0.316
77	87.2	4.3	18	1.29	23.0554	27.62	8.42	0.035	11.28	25.53	0.452	0.1087	0.0195	0.1328	0.2308
78	90.1	6.6	18.5	1.41	29.269	30.29	9.56	0.044	11.73	27.41	0.464	0.1255	0.0229	0.146	0.2475
79	89.1	5.9	18.4	1.38	27.368	28	9.24	0.041	11.58	26.85	0.462	0.1201	0.022	0.1452	0.241
80	92.6	8.8	19.1	1.6	34.78	32	10.83	0.046	12.39	29.31	0.475	0.144	0.0257	0.1617	0.271
81	103	12.8	21.3	2.11	58.124	39	16.42	0.109	13.89	32.35	0.51	0.2352	0.0754	0.2135	0.3262
82	95	11.2	19.4	1.78	42.235	36.62	13.45	0.058	13.12	30.68	0.486	0.1617	0.0321	0.1896	0.3021
83	96.8	11.4	19.5	1.78	42.861	36.74	13.42	0.062	13.13	30.76	0.491	0.1618	0.0332	0.1905	0.304
84	86.9	4.7	18	1.31	23.155	27	8.53	0.037	11.32	25.76	0.456	0.1119	0.0203	0.1362	0.2355
85	93.6	9.6	19.1	1.69	37.2977	33.83	11.7	0.052	12.73	29.75	0.478	0.1498	0.0276	0.1726	0.2873
86	104.3	13	21	2.14	59.126	41.08	17.18	0.13	14.02	32.85	0.514	0.2425	0.1074	0.2152	0.3301
87	90.8	7.1	18.6	1.47	30.214	30.78	9.75	0.046	11.83	27.65	0.464	0.1308	0.0234	0.1496	0.252
88	101.5	12.7	19.8	2.121	57.645	38	16.37	0.087	13.75	32.14	0.508	0.2298	0.0726	0.213	0.3234
89	92.4	8.6	19	1.6	34.5218	31	10.82	0.047	12.35	29.26	0.474	0.1452	0.0256	0.1596	0.272
90	91.2	7.8	18.7	1.52	31.425	31.74	10.16	0.047	12.13	28.34	0.469	0.1349	0.0239	0.1516	0.2575
91	87.1	4.2	17.9	1.29	23.158	27.46	8.39	0.034	11.25	25.51	0.453	0.1081	0.0194	0.1287	0.2284
92	95.6	10.5	19.3	1.73	38.526	35.14	12.2	0.056	12.95	30.14	0.481	0.151	0.0298	0.1816	0.2936
93	79.5	2.4	17.2	1.16	17.7425	24.62	6.02	0.021	10.58	23.12	0.439	0.0965	0.0142	0.1114	0.2017
94	76.9	1.6	16.4	0.96	11.635	19.65	4.91	0.016	10.08	21.26	0.399	0.0796	0.0101	0.1017	0.181
95	86.5	4.9	18	1.32	24.2158	28.01	8.68	0.038	11.43	25.83	0.456	0.1136	0.0204	0.1365	0.2382
96	90.8	6.8	18.5	1.43	29.781	30.62	9.72	0.045	11.75	27.51	0.464	0.1278	0.0234	0.1492	0.2487
97	87.6	5.1	18.1	1.34	25.4157	28.74	8.81	0.04	11.43	26.12	0.458	0.1162	0.0206	0.1391	0.2396
98	86.6	3.8	17.8	1.27	22.564	27.31	8.18	0.032	11.17	25.39	0.448	0.1069	0.0185	0.1254	0.2244
99	78.9	2.6	17.4	1.17	18.76	25.23	7.1	0.024	10.69	23.75	0.442	0.0992	0.0148	0.1128	0.204
100	92.6	8.9	19	1.6	35.284	32.93	11.13	0.049	12.45	29.35	0.476	0.145	0.0258	0.1617	0.2739
101	97.3	10.5	19.2	1.74	38.652	35.51	12.26	0.057	13.03	30.38	0.482	0.1572	0.0312	0.1834	0.2951
102	91.1	7.5	18.7	1.51	31.264	31.744	10.12	0.047	12.1	28.25	0.469	0.132	0.0238	0.1513	0.2571
103	97.4	11.6	19.6	1.81	43.287	36.94	13.78	0.063	13.14	30.86	0.491	0.1644	0.0334	0.1932	0.3086
1	53.7	2.1	8.2	0.45	10.857	12	3.87	0.015	6.82	15.96	0.254	0.0508	0.008	0.0522	0.1207
2	57.3	3.6	9.5	0.53	13.625	14	4.75	0.023	7.25	17.05	0.271	0.0625	0.01	0.065	0.1359
3	53.6	2	8	0.43	10.8874	12	3.82	0.015	6.74	15.96	0.252	0.0497	0.0085	0.0514	0.117
4	53.9	2.3	8.23	0.44	11.0254	12	4.01	0.016	6.85	16.02	0.257	0.0513	0.0087	0.0526	0.1214
5	55.1	2.5	8.6	0.46	11.9652	13.63	4.12	0.017	7.02	16.21	0.262	0.054	0.0095	0.054	0.126
6	51.4	1.4	7.6	0.37	8.31654	11	3.42	0.012	6.51	14.95	0.25	0.045	0.0071	0.0436	0.111
7	52.7	1.9	7.9	0.44	10.2554	12.62	3.71	0.014	6.74	15.93	0.251	0.0487	0.0082	0.0497	0.1154
8	54.1	2.2	8.4	0.45	11.241	13.28	4.08	0.017	6.85	16.14	0.259	0.0528	0.0089	0.0538	0.1232
9	50.5	1.3	7.2	0.35	7.8754	11	3.26	0.009	6.31	14.72	0.245	0.0441	0.0065	0.0357	0.1063
10	48.9	1.2	6.5	0.34	7.6315	11.39	2.85	0.008	6.25	14.36	0.239	0.0433	0.0063	0.031	0.102
11	56.1	2.8	8.8	0.48	12.3155	13	4.35	0.018	7.04	16.28	0.263	0.0567	0.0101	0.0556	0.128
12	55.1	2.6	8.7	0.47	12.0559	13	4.16	0.018	7.02	19.21	0.262	0.0551	0.0098	0.0552	0.1281
13	58.3	4.2	9.8	0.57	14.369	15.96	5.51	0.026	7.4	17.48	0.274	0.0651	0.0141	0.0684	0.1405
14	52.1	1.6	7.8	0.38	9.2684	12.15	3.54	0.012	6.57	15.75	0.251	0.047	0.0075	0.0476	0.113
15	55.4	3.4	9	0.52	13.1324	14.72	4.62	0.021	7.15	16.75	0.265	0.0614	0.0117	0.057	0.1347
16	59.1	6.2	11.2	0.69	19.872	17.84	7.02	0.036	7.95	18.76	0.29	0.0748	0.0219	0.0876	0.157
17	55.2	3.1	9	0.51	12.8754	14.45	4.52	0.021	7.14	16.52	0.263	0.0597	0.012	0.057	0.1313
18	58.7	5.9	10.9	0.67	18.754	16	6.78	0.035	7.87	18.47	0.287	0.0718	0.018	0.0817	0.1552
19	61.7	7.2	12.2	0.76	23.446	19.72	8.02	0.05	8.18	19.38	0.296	0.0798	0.0267	0.1474	0.1698
20	56.3	3.7	9.5	0.55	13.847	14	4.93	0.022	7.29	17.08	0.272	0.0635	0.0126	0.0611	0.1358
21	59.8	6.8	11.9	0.74	22.514	19.38	7.74	0.048	8.16	19.07	0.295	0.0789	0.0265	0.1375	0.164
22	59.1	6.3	11.4	0.7	19.955	17.9	7.21	0.04	8.02	18.85	0.291	0.0751	0.0234	0.0942	0.1591
23	58.2	5.2	10.4	0.63	15.9387	16	6.3	0.03	7.62	18.14	0.282	0.0688	0.0161	0.0752	0.1496
24	58.2	5.4	10.6	0.65	16.8987	17.25	6.35	0.032	7.68	18.2	0.283	0.0692	0.0173	0.075	0.152
25	58.2	5.4	10.5	0.63	16.584	17.23	6.32	0.031	7.68	18.15	0.281	0.0689	0.0168	0.075	0.1506
26	57.4	4.6	10.1	0.589	15.028	16	5.87	0.028	7.52	17.78	0.278	0.0668	0.014	0.0712	0.1426
27	64.8	7.3	12.4	0.78	24.101	19	8.26	0.052	8.32	19.54	0.298	0.0806	0.0282	0.151	0.1719
28	58.6	5.8	10.9	0.65	18.754	16	6.77	0.034	7.82	18.49	0.287	0.0715	0.0179	0.0817	0.1542
29	58.6	4.2	9.7	0.56	14.328	15.58	5.38	0.025	7.33	17.43	0.274	0.0647	0.0134	0.06489	0.1387
30	54.6	3.1	9	0.48	12.784	14.36	4.45	0.02	7.13	16.45	0.264	0.057	0.0111	0.0578	0.1304
31	59.3	4.5	10.1	0.59	14.865	16	5.82	0.027	7.48	17.75	0.277	0.0668	0.014	0.0708	0.141
32	57.3	4.6	10.1	0.6	15.146	16.75	5.87	0.028	7.55	17.92	0.278	0.065	0.0152	0.0722	0.1428
33	63.2	7.5	13	0.81	27.126	21.65	9.31	0.054	8.68	20.33	0.31	0.0863	0.0295	0.1592	0.1778
34	63.1	7.4	12.6	0.79	24.513	20	9.61	0.053	8.37	19.86	0.301	0.0826	0.0286	0.1514	0.1728
35	56.1	3.4	9.2	0.53	13.25	14.96	4.65	0.022	7.23	16.92	0.269	0.0619	0.012	0.0601	0.1352
36	60.7	7.2	12.5	0.75	23.542	18	8.05	0.052	8.23	19.4	0.297	0.0801	0.0271	0.148	0.1708
37	65.2	7.8	13.5	0.99	30.241	23.39	11.63	0.059	9.18	21.42	0.332	0.1241	0.0365	0.1821	0.1997
38	58.4	5.6	10.8	0.64	17.2185	17.32	6.61	0.032	7.73	18.29	0.284	0.0695	0.0175	0.0777	0.1807
39	58.6	5.7	10.8	0.65	18.274	16	6.68	0.032	7.82	18.43	0.286	0.0701	0.0177	0.0798	0.154
40	40.6	0.8	5.8	0.3	7.39558	10.95	1.95	0.004	6.07	13.96	0.213	0.0382	0.0045	0.0308	0.094
41	66.5	7.8	13.1	0.89	28.462	23.45	10.95	0.0569	9.1	20.68	0.315	0.0921	0.0325	0.1742	0.1831
42	68.7	8.4	13.7	1.02	35.214	24.53	11.93	0.058	10.36	20.95	0.341	0.1253	0.0415	0.1866	0.2149
43	56.7	4.5	9.9	0.58	14.632	15	5.7	0.026	7.46	17.59	0.276	0.0658	0.0148	0.0698	0.1417
44	62.8	7.2	12.5	0.758	23.912	19	8.12	0.052	8.23	19.42	0.298	0.0804	0.0271	0.1503	0.1711
45	60.2	6.8	12	0.75	22.316	19.42	7.87	0.05	8.17	19.11	0.295	0.076	0.0265	0.1435	0.1653
46	59.1	6.2	11.3	0.7	19.902	17.92	7.08	0.036	8.02	18.75	0.29	0.0749	0.0232	0.0941	0.1587
47	59.6	6.8	11.9	0.734	21.965	17	7.7	0.047	8.17	19.02	0.294	0.0781	0.0265	0.1145	0.163
48	53.2	2	8.1	0.42	10.714	12	3.75	0.015	6.74	15.96	0.251	0.0494	0.0083	0.0504	0.1158
49	59.5	6.7	11.7	0.72	20.648	18	7.6	0.044	8.06	18.96	0.293	0.0772	0.0257	0.0995	0.162
50	61.2	7.7	13.1	0.84	28.235	22.36	10.85	0.057	8.85	20.55	0.312	0.0914	0.0311	0.1655	0.1781
51	63.2	7.9	13.4	0.89	30.124	23.42	11.47	0.057	9.12	20.74	0.321	0.0934	0.0337	0.1756	0.1892
52	56.2	4	9.6	0.56	14.32	15.35	5.14	0.023	7.33	17.41	0.273	0.0638	0.0133	0.0632	0.1383
53	58.8	6.1	11.1	0.67	19.227	17.58	6.84	0.035	7.92	18.55	0.289	0.0735	0.0203	0.0829	0.15
54	49.3	1.2	6.9	0.34	7.864	13	3.21	0.007	6.28	14.72	0.243	0.0436	0.0066	0.0344	0.104
55	54.1	2.4	8.4	0.45	11.3654	13.29	4.08	0.016	6.88	16.15	0.259	0.052	0.0091	0.0542	0.123
56	58.7	5.6	10.8	0.65	18.485	17.4	6.75	0.035	7.81	18.47	0.287	0.0715	0.0178	0.0811	0.1537
57	49.2	1	6.1	0.32	7.5264	11.21	2.75	0.006	6.16	14.19	0.228	0.0405	0.0062	0.018	0.1022
58	50.7	1.3	7.3	0.35	8.264	11.75	3.41	0.009	6.39	14.72	0.247	0.0442	0.006	0.0415	0.108
59	58.3	5.5	10.7	0.65	17.4852	17.25	6.54	0.032	7.71	18.26	0.284	0.0693	0.0173	0.076	0.154
60	55.2	3.2	9.1	0.5	12.8541	14.456	4.54	0.019	7.13	16.72	0.263	0.0597	0.0117	0.0587	0.1338
61	58.2	4.8	10.2	0.62	15.124	16.82	5.92	0.028	7.53	17.94	0.277	0.0682	0.0152	0.0726	0.1425
62	54.2	3.3	9	0.51	12.983	14.72	4.61	0.02	7.15	16.74	0.264	0.0609	0.0117	0.0592	0.1339
63	56.2	3.9	9.5	0.55	14.136	14	5.06	0.023	7.31	17.25	0.272	0.0635	0.01	0.0622	0.1365
64	57.6	5	10.3	0.61	15.354	16.85	5.98	0.029	7.54	17.94	0.278	0.0683	0.0154	0.0731	0.1436
65	51.9	1.6	8.1	0.4	9.6254	12.45	3.61	0.013	6.64	15.76	0.251	0.0481	0.0081	0.0482	0.114
66	52.4	1.6	7.9	0.4	9.62454	12.26	3.62	0.013	6.58	15.74	0.249	0.0479	0.0081	0.0482	0.113
67	57.3	4.6	10	0.59	14.726	15	5.79	0.027	7.48	17.68	0.276	0.0667	0.0147	0.0702	0.1418
68	57.3	4.2	9.7	0.55	14.428	15.96	5.42	0.026	7.35	17.45	0.275	0.0648	0.0135	0.0672	0.1405
69	56	3.8	9.3	0.55	13.736	14	4.87	0.022	7.26	17.05	0.271	0.063	0.011	0.0608	0.1357
70	52.6	1.6	8	0.42	9.8754	12.6	3.65	0.014	6.68	15.87	0.251	0.0482	0.0078	0.0492	0.114
71	57.3	5	10.4	0.63	15.784	17.16	6.28	0.03	7.61	18.12	0.281	0.0687	0.0162	0.073	0.1463
72	59.2	6.4	11.5	0.71	20.014	17.92	7.28	0.041	8.03	18.81	0.292	0.0753	0.0244	0.093	0.1604
73	55.7	3.6	9.2	0.55	13.638	14.98	4.71	0.022	7.21	16.95	0.271	0.0622	0.0121	0.0605	0.1355
74	58.8	6.1	10.9	0.66	19.065	17	6.81	0.034	7.93	18.55	0.289	0.0732	0.0195	0.0826	0.1552
75	54.2	2.9	8.9	0.49	12.3265	13	4.37	0.018	7.11	16.39	0.264	0.0572	0.0104	0.0573	0.1296
76	63.5	7.3	12.6	0.78	24.317	20	8.54	0.052	8.32	19.61	0.3	0.082	0.0287	0.1512	0.1724
77	55.1	2.6	8.6	0.45	11.875	13.36	4.11	0.017	6.98	16.2	0.261	0.053	0.0093	0.0542	0.1274
78	55.8	3.8	9.3	0.56	14.027	14	5.04	0.023	7.3	17.19	0.271	0.0637	0.0129	0.0615	0.1362
79	55.7	3.3	9.1	0.5	13.226	14	4.63	0.021	7.19	16.89	0.267	0.0616	0.0118	0.0597	0.1351
80	57.3	5.2	10.4	0.63	15.6225	17.02	6.14	0.03	7.56	18.04	0.278	0.065	0.0158	0.0738	0.1445
81	63.2	7.3	12.8	0.79	26.785	22	9.21	0.054	8.52	20.21	0.311	0.0831	0.0293	0.1592	0.1755
82	59.2	6.4	11.5	0.71	20.325	18.25	7.35	0.042	8.05	18.85	0.292	0.075	0.0247	0.0946	0.1607
83	59.3	6.5	11.6	0.72	20.512	18.54	7.58	0.043	8.07	18.91	0.292	0.0769	0.0254	0.0987	0.1608
84	54.8	2.7	8.7	0.47	12.2854	13	4.36	0.017	7.02	16.27	0.263	0.0554	0.0098	0.0554	0.1283
85	58.3	5.7	10.8	0.65	18.2354	16	6.64	0.032	7.76	18.43	0.284	0.0695	0.0176	0.0784	0.153
86	65.3	7.6	13	0.82	27.834	22.01	9.96	0.056	8.8	20.38	0.312	0.0865	0.0309	0.1611	0.1785
87	58.1	4.1	9.6	0.56	14.308	15.48	5.28	0.024	7.33	17.41	0.274	0.0645	0.0133	0.0639	0.1382
88	63.2	7.5	12.7	0.78	24.734	21.18	8.64	0.053	8.42	19.94	0.311	0.0835	0.028	0.1537	0.177
89	57.9	5.1	10.3	0.62	15.654	16.92	6.12	0.03	7.55	17.98	0.278	0.0686	0.1057	0.0739	0.1436
90	56.3	4.5	9.9	0.58	14.526	16.12	5.56	0.026	7.43	17.55	0.276	0.0657	0.0144	0.0693	0.1416
91	53.6	2.4	8.6	0.45	11.565	13.32	4.11	0.017	6.94	16.17	0.26	0.053	0.009	0.0542	0.1245
92	58.9	6.1	11.2	0.69	19.241	17.65	6.92	0.035	7.95	18.63	0.29	0.0737	0.0208	0.0834	0.155
93	51.3	1.3	7.5	0.36	8.32874	12.89	3.39	0.011	6.42	14.95	0.25	0.0448	0.0071	0.042	0.1072
94	47.2	1	5.8	0.32	7.2471	11	2.41	0.005	6.13	14.15	0.22	0.0405	0.0054	0.0308	0.0968
95	54.8	2.9	8.7	0.48	12.364	13	4.36	0.018	7.06	16.35	0.264	0.0568	0.0102	0.0565	0.1292
96	56.8	4	9.6	0.55	14.128	14	5.08	0.024	7.32	17.4	0.273	0.0635	0.0131	0.0625	0.1365
97	55.7	3	8.9	0.49	12.7164	13	4.39	0.019	7.12	16.42	0.263	0.0574	0.0106	0.0576	0.1302
98	53.8	2.2	8.3	0.45	11.254	13.26	4.05	0.016	6.85	16.05	0.258	0.0516	0.0086	0.0536	0.1228
99	52.1	1.5	7.6	0.38	8.5214	12.09	3.44	0.012	6.51	15.32	0.248	0.047	0.0074	0.0465	0.112
100	58.3	5.2	10.4	0.63	15.6558	17.14	6.18	0.03	7.58	18.12	0.279	0.0687	0.0159	0.072	0.1447
101	58.8	6.2	11.2	0.69	19.556	17.68	6.97	0.036	7.95	18.64	0.29	0.0747	0.0208	0.0862	0.156
102	56.8	4.4	9.8	0.58	14.532	16.05	5.52	0.025	7.42	17.52	0.276	0.0653	0.012	0.0691	0.1414
103	59.5	6.7	11.8	0.73	21.204	18	7.62	0.046	8.09	18.98	0.293	0.0775	0.0263	0.1074	0.162
